1  
2  
3  
4  
5  
6  
7  
8  
9  
10  
11  
12  
13  
14  
15  
16  
17  
18  
19  
20  
21  
22  
23  
24  
25

**Basolateral amygdala CB1 receptors modulate HPA axis activation and context-cocaine  
memory strength during reconsolidation**

Jessica A. Higginbotham<sup>1</sup> PhD, Nicole M. Jones<sup>1</sup> BS, Rong Wang<sup>1</sup> BA,  
Ryan J. McLaughlin<sup>1,2,3</sup> PhD, and Rita A. Fuchs<sup>1,2,3</sup> PhD

<sup>1</sup>*Department of Integrative Physiology and Neuroscience, Washington State University College of Veterinary Medicine, Pullman, WA, USA*

<sup>2</sup>*Washington State University Alcohol and Drug Abuse Research Program, Pullman, WA, USA*

<sup>3</sup>*Translational Addiction Research Collaborative, Washington State University, Pullman, WA, USA*

**\*Corresponding Author:**

Rita A. Fuchs, PhD  
Department of Integrative Physiology and Neuroscience  
Washington State University College of Veterinary Medicine  
PO Box 647620, Pullman, WA 99164-7620  
E-mail: [rita.fuchs@wsu.edu](mailto:rita.fuchs@wsu.edu),  
Phone: 509-335-6164;  
Fax: 509-335-4650

34 **ABSTRACT**

35 Re-exposure to a cocaine-associated context triggers craving and relapse through the retrieval of  
36 salient context-drug memories. Upon retrieval, context-drug memories become labile and  
37 temporarily sensitive to modification before they are reconsolidated into long-term memory stores.  
38 Cannabinoid type 1 receptor (**CB1R**) signaling is necessary for cocaine-memory reconsolidation  
39 and associated glutamatergic plasticity in the basolateral amygdala (**BLA**); however, it remains  
40 unclear whether CB1Rs in the BLA mediate this phenomenon. To investigate this question, we  
41 examined whether CB1R antagonist or agonist administration into the BLA immediately after  
42 cocaine-memory retrieval (i.e., during memory reconsolidation) alters cocaine-memory strength  
43 and subsequent drug context-induced cocaine-seeking behavior in an instrumental rodent model  
44 of cocaine relapse. Intra-BLA administration of the CB1R antagonist, AM251 (0.3 µg/hemisphere)  
45 – during, but not after, memory reconsolidation – increased drug context-induced cocaine-seeking  
46 behavior three days later, while the CB1R agonist, WIN55,212-2 (0.5 µg/hemisphere) failed to  
47 alter this behavior. Furthermore, AM251 administration into the posterior caudate putamen  
48 (anatomical control region) during memory reconsolidation did not alter subsequent context-  
49 induced cocaine-seeking behavior. In a follow-up experiment, cocaine-memory retrieval elicited  
50 robust hypothalamic-pituitary-adrenal axis activation, as indicated by an increase in blood serum  
51 corticosterone concentration, and this response was selectively extended by intra-BLA AM251  
52 administration during the putative time of memory reconsolidation relative to all control conditions.  
53 Together, these findings suggest that CB1R populations in the BLA gate memory strength or  
54 interfere with memory maintenance, possibly by diminishing the impact of cue-induced arousal  
55 on the integrity of the reconsolidating memory trace or on the efficiency of the memory  
56 reconsolidation process.

## 57 INTRODUCTION

58 Exposure to drug-associated environmental stimuli precipitates the retrieval of context-  
59 drug memories, thereby eliciting drug craving and relapse [1-3]. Upon retrieval from long-term  
60 memory stores, context-drug memories can become temporarily unstable and susceptible to  
61 modification. The maintenance of such labile memories requires their reconsolidation into long-  
62 term memory stores through a process that involves *de novo* protein synthesis [4] and synaptic  
63 plasticity [5]. Importantly, pathological memory reconsolidation may result in overly salient or  
64 intrusive drug memories, contributing to the etiology of substance use disorders (**SUDs**), and  
65 memory reconsolidation can be manipulated therapeutically to reduce the strength of drug  
66 memories and thus the propensity for drug relapse [6]. Therefore, elucidating the neurobiological  
67 underpinnings of cocaine-memory reconsolidation is important from a SUD treatment perspective.

68 Cannabinoid type 1 receptor (**CB1R**) signaling plays a critical role in cocaine-memory  
69 reconsolidation. Specifically, our laboratory has shown that systemic CB1R antagonist  
70 administration during cocaine-memory reconsolidation attenuates subsequent drug context-  
71 induced cocaine-seeking behavior [7]. Moreover, systemic CB1R antagonist administration  
72 interferes with glutamatergic transmission in the basolateral amygdala (**BLA**) [7], a site of protein  
73 synthesis-dependent memory reconsolidation [8-13]. However, questions remain about the  
74 contribution of BLA CB1R populations, because previous research indicates that BLA CB1R  
75 agonism [14] or antagonism [15] can similarly impair fear-memory reconsolidation. Furthermore,  
76 the role of BLA CB1Rs in appetitive memory reconsolidation has not been investigated.

77 The present study examined whether BLA CB1R signaling is necessary for cocaine-  
78 memory reconsolidation. First, we evaluated the effects of intra-BLA CB1R antagonist and agonist  
79 treatments administered immediately after cocaine-memory retrieval (i.e., during the putative time  
80 of memory reconsolidation) on memory strength, as indicated by the magnitude of subsequent  
81 context-induced cocaine-seeking behavior. Next, we examined whether the effects on memory

82 reconsolidation were anatomically specific to CB1Rs in the BLA by manipulating CB1Rs in the  
83 adjacent posterior caudate putamen (**pCPu**). Finally, as a step toward identifying a mechanism  
84 by which BLA CB1Rs regulate cocaine-memory reconsolidation, we assessed the effects of intra-  
85 BLA CB1R antagonist treatment on blood serum corticosterone concentrations, an index of  
86 hypothalamic pituitary adrenal (**HPA**) axis activity. Our previous findings indicate that cocaine-  
87 memory reconsolidation is associated with increased HPA axis activity [16]. Furthermore,  
88 stressor-induced suppression of endocannabinoid signaling in the BLA is critical for stress-  
89 induced HPA axis activation [17]. Therefore, we predicted that intra-BLA CB1R antagonist  
90 treatment would selectively potentiate increases in corticosterone concentrations during cocaine-  
91 memory reconsolidation.

92

## 93 **MATERIALS AND METHODS**

### 94 ***Animals***

95 Male Sprague-Dawley rats ( $N=112$ ; 275-300 g upon arrival; Envigo Laboratories, South Kent,  
96 WA) were housed individually in a temperature- and humidity-controlled vivarium on a reversed  
97 light/dark cycle (lights on at 6:00 am). Rats received *ad libitum* access to water and 20-25 g of  
98 standard rat chow per day. Animal housing and care followed the guidelines defined in the *Guide*  
99 *for the Care and Use of Laboratory Animals* [18] and was approved by the Washington State  
100 University Institutional Animal Care and Use Committee.

101

### 102 ***Food Training***

103 To facilitate the acquisition of lever pressing for un-signaled cocaine infusions, rats were first  
104 trained to lever press for food reinforcement in standard operant conditioning chambers  
105 (Coulbourn Instruments, Holliston, MA) during a 16-h overnight session as described previously

106 [8]. Food training was conducted in a dedicated chamber without exposure to contextual stimuli  
107 used for subsequent cocaine conditioning.

108

### 109 ***Surgery***

110 Twenty-four h after food training, rats were fully anesthetized using ketamine hydrochloride and  
111 xylazine (100 and 5 mg/kg, i.p., respectively; Dechara Veterinary Products, Overland Park, KS  
112 and Akorn, Lake Forest, IL). Jugular catheters were implanted into the right jugular vein.  
113 Stainless-steel guide cannulae (26-Ga, P1 Technologies, Roanoke, VA) were aimed at the BLA  
114 (-2.7 mm AP,  $\pm$ 5.0 mm ML, -6.6 mm DV relative to bregma) or pCPu (-2.7 mm AP,  $\pm$ 5.0 mm ML,  
115 -4.5 mm DV relative to bregma). Stainless-steel screws and dental acrylic anchored the cannulae  
116 to the skull. Rats received the analgesic, carprofen (5 mg/kg per day, p.o.; ClearH2O, Westbrook,  
117 ME) for 24 h before and 48 h after surgery. The catheters were maintained and periodically tested  
118 for patency, as previously described [19]. Rats received five days for post-surgical recovery.

119

### 120 ***Cocaine Self-Administration and Extinction Training***

121 Rats were randomly assigned to one of two distinctly different environmental contexts (**Table S1**)  
122 for cocaine self-administration training [8]. Training in the designated context was conducted for  
123 two h each day, during the rats' dark cycle. During the sessions, active-lever responses were  
124 reinforced under a fixed ratio 1 schedule of cocaine reinforcement (0.15 mg of cocaine  
125 hydrochloride/50- $\mu$ L infusion, delivered over 2.25 s, i.v.; NIDA Drug Supply Program, Research  
126 Triangle Park, NC) with a 20-s timeout period. Active-lever responses during timeouts and  
127 inactive-lever responses throughout the session were not reinforced. Training continued until the  
128 rats obtained at least 10 cocaine infusions per session on at least 10 days. Next, all rats received  
129 seven daily 2-h extinction training sessions in the alternate context. During extinction training,  
130 lever presses were not reinforced. After extinction session 4, rats were acclimated to the  
131 microinfusion procedure. Injection cannulae (33-Ga, Plastics One) were inserted 2 mm past the

132 tip of the guide cannulae. The injection cannulae remained in place for 4 min but fluid was not  
133 infused.

134

135 ***Experiment 1: Effects of post-retrieval AM251 administration in the BLA on drug context-***  
136 ***induced cocaine seeking three days later***

137 Twenty-four h after extinction session 7, rats were re-exposed to the cocaine-paired context for  
138 15 min to trigger cocaine-memory retrieval and reconsolidation (**Fig. 1A**). During the session,  
139 cocaine reinforcement was withheld to prevent acute cocaine effects on neurotransmission and  
140 endocannabinoid mobilization, independent of memory destabilization [20-21]. Immediately after  
141 the session, rats received bilateral intra-BLA microinfusions of the CB1R antagonist/inverse  
142 agonist, *N*-(Piperidin-1-yl)-5-(4-iodophenyl)-1-(2,4-dichlorophenyl)-4-methyl-1*H*-pyrazole-3-  
143 carboxamide (**AM251**, 0.3 µg/0.5 µL/hemisphere; *n* = 9; Sigma Aldrich, St. Louis, MO), or vehicle  
144 (**VEH**; 8% DMSO, 5% Tween80 in saline; 0.5 µL/hemisphere; *n* = 11) over 2 min. This intra-BLA  
145 dose of AM251 is sufficient to impair contextual fear-memory reconsolidation [15]. After treatment,  
146 daily extinction-training sessions resumed in the extinction context until the rats reached the  
147 extinction criterion (i.e., ≤ 25 active-lever presses per session on two consecutive days). Non-  
148 reinforced lever responses were assessed during the first extinction session following treatment  
149 to evaluate possible off-target treatment effects on extinction memories. Twenty-four h after the  
150 last extinction session, cocaine-seeking behavior was assessed in the cocaine-paired context for  
151 2 h.

152

153 ***Experiment 2: Effects of delayed AM251 administration in the BLA on drug context-***  
154 ***induced cocaine seeking three days later***

155 Experiment 2 evaluated whether the intra-BLA AM251 effects observed in Experiment 1 required  
156 manipulation when memories were unstable (i.e., within 2-4 h after memory retrieval) prior to

157 reconsolidation [22]. The procedures were identical to those in Experiment 1 except that rats  
158 received AM251 ( $n = 8$ ) or VEH ( $n = 6$ ) six h after the memory retrieval session (**Fig. 2A**).

159  
160 ***Experiment 3: Effects of post-retrieval AM251 administration in the pCPu on drug context-***  
161 ***induced cocaine seeking three days later***

162 Experiment 3 evaluated whether the AM251 effects observed in Experiment 1 were anatomically  
163 specific to the BLA. The procedures were identical to those in Experiment 1 except that rats  
164 received AM251 ( $n = 9$ ) or VEH ( $n = 7$ ) into the pCPu immediately after the memory-retrieval  
165 session (**Fig. 3A**).

166  
167 ***Experiment 4: Effects of post-retrieval WIN 55,212-2 administration in the BLA on context-***  
168 ***induced cocaine-seeking behavior three days later***

169 Experiment 4 evaluated the effects of intra-BLA CB1R agonist administration on cocaine-memory  
170 reconsolidation. The procedures were identical to those in Experiment 1, except that rats received  
171 bilateral intra-BLA microinfusions of the nonselective CB1/CB2R agonist, WIN 55,212-2 (**WIN**, 0.5  
172  $\mu\text{g}/0.5\text{-}\mu\text{L}$  infusion/hemisphere;  $n = 11$ ; Tocris Bioscience, Minneapolis, MN) or VEH (10% DMSO,  
173 10% Tween80 in saline; 0.5  $\mu\text{L}$ -infusion/hemisphere;  $n = 11$ ) immediately after the memory-  
174 retrieval session (**Fig. 4A**). This intra-BLA dose of WIN enhances nicotine-conditioned place  
175 preference memory consolidation [23].

176  
177 ***Experiment 5: Effects of post-retrieval AM251 administration in the BLA on serum***  
178 ***corticosterone concentrations during cocaine-memory reconsolidation***

179 Experiment 5 examined the effects of cocaine-memory retrieval and intra-BLA AM251 treatment  
180 on serum corticosterone concentrations during the first 90 min of memory reconsolidation [16].  
181 The training procedures were identical to those in Experiment 1, except that rats were acclimated  
182 to blood sample collection via tail nick ( $\sim 200 \mu\text{L}/\text{sample}$ ) immediately before and after extinction

183 session 6. Pre-session baseline blood samples were collected immediately before extinction  
184 session 7 (**Baseline**). Post-session blood samples were collected immediately after extinction  
185 session 7 (**Post-EXT**) and immediately after the memory-retrieval session in the cocaine-paired  
186 context (**Post-COC**;  $n = 11$ ) or after comparable exposure to the home cage (**Post-Home**;  $n =$   
187  $11$ ) on post-cocaine day 8. AM251 ( $n = 6,6$ ) or VEH ( $n = 5,5$ ) was administered into the BLA  
188 immediately after the memory-retrieval session or exposure to the home cage. Post-treatment  
189 blood samples were collected 30, 60, and 90 min later (**Fig. 5A**). Blood samples were centrifuged  
190 at 4 °C. Blood serum was collected and stored at -20 °C. Samples were assayed in duplicates  
191 using the MP Biomedicals Corticosterone RIA kit for rats and mice (intra-assay coefficient of  
192 variation = 1.77 %, lower limit of detectability = 25 ng/mL).

193

#### 194 ***Histology***

195 Rats were overdosed with a cocktail of ketamine and xylazine (300 and 15 mg/kg, respectively,  
196 i.p.). The brains were removed, flash frozen in isopentane, and stored at -80 °C. Forty- $\mu$ m coronal  
197 brain sections were collected and stained with cresyl violet (Kodak, Rochester, NY, USA) to  
198 visualize cannula placement. Data of rats with cannula placements outside of the BLA or pCPu  
199 were excluded from the statistical analysis.

200

#### 201 ***Data analysis***

202 Potential pre-existing group differences in cocaine intake and lever presses during (a) drug self-  
203 administration training (last 10 days), (b) extinction training (7 days), and (c) during the memory-  
204 retrieval session were analyzed using separate analyses of variance (ANOVA) with subsequent  
205 treatment group (VEH, AM251 or WIN) as the between-subjects factor and time (day) as the  
206 within-subject factor, as appropriate. Lever presses during the first post-treatment extinction  
207 session and the test session in the cocaine context were analyzed using ANOVAs with treatment  
208 (AM251 or WIN, VEH) as the between-subjects factor and context (extinction, cocaine-paired)



209 and time (20-min interval) as within-subjects factors, where appropriate. Serum corticosterone  
210 concentrations were analyzed using ANOVAs with context (Post-EXT, Post-COC, Post-Home),  
211 memory retrieval (memory retrieval, no-memory retrieval), and treatment (AM251, VEH) as  
212 between-subjects factors, and time or context (Baseline, Post-EXT or Post-COC; and 30-min  
213 intervals) as within-subjects factors, where appropriate. Significant interaction and main effects  
214 were further analyzed using *post hoc* Sidak's multiple comparisons tests or Tukey's tests, where  
215 appropriate. Alpha was set at 0.05 for all analyses.

216

## 217 **RESULTS**

### 218 ***Behavioral History***

219 The groups did not differ in drug intake during cocaine self-administration training or in active- or  
220 inactive-lever responding during cocaine self-administration training, extinction training, or  
221 cocaine-memory retrieval in Experiments 1-5 (see ANOVA results in **Table S2**). The groups also  
222 did not differ in the mean number of sessions required to reach the extinction criterion prior to  
223 testing in Experiments 1-4 (mean  $\pm$  SEM = 2.16  $\pm$  0.14). Thus, testing in the cocaine-paired  
224 context occurred for most rats three days post treatment.

225

### 226 ***Experiment 1: Intra-BLA AM251 administration during cocaine-memory reconsolidation*** 227 ***increased subsequent drug context-induced cocaine seeking***

228 Intra-BLA AM251 treatment immediately after cocaine-memory retrieval selectively increased  
229 drug context-induced cocaine-seeking behavior three days later relative to VEH (ANOVA context  
230 x treatment interaction,  $F_{(1,18)} = 14.60$ ,  $p = 0.001$ ; context main effect  $F_{(1,18)} = 299.20$ ,  $p < 0.0001$ ;  
231 treatment main effect,  $F_{(1,18)} = 9.79$ ,  $p = 0.006$ ). Active-lever responding was higher in the cocaine-  
232 paired context than in the extinction context (**Fig. 1D**; Sidak's test,  $p < 0.05$ ). Furthermore, AM251  
233 administered after memory retrieval increased responding in the cocaine-paired context (Sidak's  
234 test,  $p < 0.05$ ), but not in the extinction context, relative to VEH. Time-course analysis indicated

235 that active-lever responding declined over time in the cocaine-paired context at test (ANOVA time  
236 main effect,  $F_{(5,90)} = 25.61$ ,  $p < 0.0001$ , Tukey's tests, interval 1 > 2-6,  $p < 0.05$ ; time x treatment  
237 interaction,  $F_{(5,90)} = 0.44$ ,  $p = 0.82$ ), and AM251 increased responding relative to VEH independent  
238 of time (**Fig. 1E**; treatment main effect,  $F_{(1,18)} = 12.46$ ,  $p = 0.002$ ). Inactive-lever responding  
239 remained low in both contexts (**Fig.1F**; all  $F_s \leq 3.96$ ,  $p_s \geq 0.06$ ), and it declined during the test  
240 session independent of treatment (**Fig. 1G**; ANOVA time main effect only,  $F_{(5,90)} = 10.45$ ,  $p <$   
241  $0.0001$ , Tukey test, interval 1 > 2-6,  $p < 0.05$ ; all other  $F_s \leq 0.23$ ,  $p_s \geq 0.87$ ).

242

243 ***Experiment 2: Intra-BLA AM251 administration after memory re-stabilization did not alter***  
244 ***subsequent drug context-induced cocaine seeking***

245 Intra-BLA AM251 administration six h after memory retrieval did not alter cocaine-seeking  
246 behavior three days later relative to VEH (**Fig. 2D**; ANOVA treatment main and interaction effects,  
247  $F_s \leq 0.01$ ,  $p_s \geq 0.90$ ). Thus, active-lever responding was higher in the cocaine-paired context than  
248 in the extinction context, independent of treatment (context main effect,  $F_{(1,12)} = 86.26$ ,  $p < 0.0001$ ).  
249 Time-course analysis confirmed that active-lever responding declined over time in the cocaine-  
250 paired context at test, independent of treatment (**Fig. 2E**; ANOVA time main effect,  $F_{(5,60)} = 18.02$ ,  
251  $p < 0.0001$ , Tukey test, interval 1 > 2-6,  $p < 0.05$ ; all other  $F_s \leq 0.001$ ,  $p_s \geq 0.93$ ). Inactive-lever  
252 responding remained low in both contexts (**Fig.2F**; all  $F_s \leq 1.51$ ,  $p_s \geq 0.24$ ), and it declined during  
253 the test session independent of treatment (**Fig. 2G**; ANOVA time main effect  $F_{(5,60)} = 18.02$ ,  $p <$   
254  $0.0001$ , Tukey test, interval 1 > 2-6,  $p < 0.05$ ; all other  $F_s \leq 0.26$ ,  $p_s \geq 0.93$ ).

255

256 ***Experiment 3: Intra-pCPu AM251 administration during cocaine-memory reconsolidation***  
257 ***did not alter subsequent drug context-induced cocaine seeking***

258 Intra-pCPu AM251 administration immediately after cocaine-memory retrieval did not alter  
259 cocaine-seeking behavior relative to VEH three days later (**Fig. 3D**; ANOVA, all  $F_{s(1,14)} \leq 0.70$ ,  $p_s$   
260  $\geq 0.42$ ). Active-lever responding was higher in the cocaine-paired context than in the extinction

261 context, independent of treatment (context main effect,  $F_{(1,14)} = 38.59$ ,  $p < 0.0001$ ). Furthermore,  
262 time-course analysis indicated that responding declined over time in the cocaine-paired context,  
263 independent of treatment (**Fig. 3E**; ANOVA, time main effect,  $F_{(5,70)} = 15.75$ ,  $p < 0.0001$ , Tukey  
264 test, interval 1 > 2-6,  $p < 0.05$ ; all other  $F_s \leq 0.49$ ,  $p_s \geq 0.68$ ). Inactive-lever responding remained  
265 low in both contexts (**Fig. 1F**; all  $F_s \leq 2.28$ ,  $p_s \geq 0.15$ ), and it declined during the test session  
266 independent of treatment (**Fig. 1G**; ANOVA time main effect  $F_{(5,70)} = 10.35$ ,  $p < 0.004$ , Tukey test,  
267 interval 1 > 2-6,  $p < 0.05$ ; all other  $F_s \leq 0.75$ ,  $p_s \geq 0.588$ ).

268

269 ***Experiment 4: Intra-BLA WIN 55,212-2 administration during memory reconsolidation***  
270 ***failed to alter subsequent drug context-induced cocaine seeking***

271 Intra-BLA WIN administration immediately after cocaine-memory retrieval did not alter cocaine-  
272 seeking behavior three days later (**Fig. 4D**; ANOVA treatment main and interaction effects,  $F_s \leq$   
273  $1.75$ ,  $p_s \geq 0.20$ ). Active-lever responding was higher in the cocaine-paired context than in the  
274 extinction context, independent of treatment (context main effect,  $F_{(1,21)} = 41.35$ ,  $p < 0.0001$ ).  
275 Similarly, time-course analysis indicated that active-lever responding declined over time at test,  
276 independent of treatment (**Fig. 4E**; ANOVA time main effect,  $F_{(5,105)} = 33.38$ ,  $p < 0.0001$ , Tukey  
277 test, interval 1 > 2-6,  $p < 0.05$ ; all other  $F_s \leq 1.30$ ,  $p_s \geq 0.27$ ). Inactive-lever responding was higher  
278 in the cocaine-paired context than in the extinction context, independent of treatment (**Fig. 4F**;  
279 ANOVA context main effect,  $F_{(1,21)} = 5.47$ ,  $p = 0.03$ ; all other  $F_{s(1,21)} \leq 1.18$ ,  $p_s \geq 0.29$ ), and it  
280 declined during the test session, independent of treatment (**Fig. 4G**; ANOVA time main effect,  
281  $F_{(5,105)} = 21.52$ ,  $p < 0.0001$ , Tukey test, interval 1 > 2-6,  $p < 0.05$ ; all other  $F_s \leq 0.72$ ,  $p_s \geq 0.41$ ).

282

283 ***Experiment 5: Intra-BLA AM251 administration potentiated increases in serum***  
284 ***corticosterone concentrations during cocaine-memory reconsolidation***

285 There were no pre-existing differences between the groups in baseline pre-session and post-  
286 extinction session serum corticosterone concentrations (ANOVA, all  $F_s \leq 2.95$ ,  $p_s \geq 0.10$ ).

287 Cocaine-memory retrieval (i.e., cocaine-paired context re-exposure) increased corticosterone  
288 concentrations compared to no-memory retrieval (i.e., extinction context or home cage re-  
289 exposure; **Fig. 5E**; ANOVA,  $F_{(3,40)} = 10.01$ ,  $p < 0.0001$ ; Tukey's tests,  $p < 0.05$ ). Furthermore,  
290 active-lever responses during the cocaine-memory retrieval session, but not during the non-  
291 memory retrieval session (extinction, not shown), positively correlated with corticosterone  
292 concentrations immediately post session (**Fig. 5D**; Pearson's  $r = 0.63$ ,  $p = 0.04$ ).

293  
294 Following intra-BLA AM251 or VEH treatment, serum corticosterone concentrations declined over  
295 time (**Fig. 5E**: 2x2x3 ANOVA time main effect,  $F_{(2,36)} = 43.51$ ,  $p < 0.0001$ , Tukey's tests, 30-min  
296 time point > 60-min and 90-min time points,  $p < 0.05$ ). However, intra-BLA AM251 administered  
297 after memory retrieval resulted in higher serum corticosterone concentrations relative to VEH after  
298 memory retrieval and relative to AM251 after no-memory retrieval (2x2x3 ANOVA treatment x  
299 retrieval interaction,  $F_{(1,18)} = 5.266$ ,  $p = 0.03$ , Sidak's tests,  $p < 0.05$ ; all other  $F_s \leq 4.21$ ,  $p_s \geq 0.06$ ).

300

## 301 **DISCUSSION**

302 In the present study, we used site-specific pharmacological manipulations to examine the  
303 contribution of BLA CB1R populations to cocaine-memory reconsolidation for the first time in an  
304 instrumental rat model of drug relapse. Our findings indicate that CB1R signaling in the BLA limits  
305 the strength of reconsolidating cocaine memories in a time-dependent manner, possibly by  
306 reducing the impact of memory retrieval-induced HPA axis activation on neural circuits engaged  
307 during memory reconsolidation.

308 BLA CB1R antagonism by AM251 immediately after cocaine-memory retrieval (i.e., during  
309 memory reconsolidation) increased subsequent drug context-induced cocaine-seeking behavior  
310 (**Fig. 1**). This effect might reflect AM251-induced augmentation of (a) memory re-stabilization  
311 efficiency or (b) memory strength itself at the time of reconsolidation, as opposed to protracted

312 enhancement of the performance of cocaine-seeking behavior, since AM251 treatment six h after  
313 cocaine-memory retrieval did not facilitate this behavior at test, relative to VEH (**Fig. 2**). The  
314 memory retrieval-dependent effects of AM251 were anatomically specific to the BLA, as AM251  
315 infusions into the dorsally adjacent pCPu after cocaine-memory retrieval failed to alter subsequent  
316 cocaine-seeking behavior relative to VEH (**Fig. 3**). Together, these findings provide the first  
317 demonstration that BLA CB1R signaling may play a negative regulatory role in appetitive-memory  
318 reconsolidation. These findings expand upon a seemingly inconsistent literature indicating that  
319 CB1R antagonist [15] or agonist [14] treatments in the BLA impair fear-memory reconsolidation.  
320 Notably, systemic administration of the same CB1R agonist can either facilitate or impair object-  
321 recognition memory *consolidation* depending on whether conditioning takes place in an  
322 unhabituated (thus emotionally arousing) or a familiar environment [24], and similar mechanisms  
323 may be at play in memory *reconsolidation*. Accordingly, varying results may reflect that specific  
324 appetitive and aversive emotional states and arousal evoked in these paradigms may differently  
325 alter endocannabinoid recruitment and, thus, the functional contribution of CB1R populations to  
326 memory reconsolidation [24-26].

327         Intra-BLA administration of the non-selective CB1R agonist, WIN, after memory retrieval  
328 failed to alter subsequent drug context-induced cocaine-seeking behavior (**Fig. 4**); even though  
329 BLA CB1R antagonism potentiated this behavior. It is unlikely that the lack of a WIN effect  
330 reflected insufficient dosing, since this intra-BLA dose (0.5 µg/hemisphere) inhibits nicotine-  
331 memory consolidation [23] while even higher doses of WIN (1-5 µg/hemisphere) fail to have  
332 consistent effects on fear-memory reconsolidation [14, 27]. Therefore, it is possible that BLA  
333 CB1R signaling is insufficient, but necessary, for limiting cocaine-memory strength during  
334 reconsolidation *per se*. Alternatively, we propose that nonselective effects of WIN interfered with  
335 our ability to selectively increase BLA CB1R signaling relevant for cocaine-memory  
336 reconsolidation. Unlike AM251, which exerts selective effects on BLA cell populations that are

337 experiencing dynamic endocannabinoid mobilization, WIN stimulates CB1Rs on both  
338 glutamatergic and GABAergic terminals within the BLA, likely with opposing effects on  
339 reconsolidation. Additionally, WIN is a nonselective agonist with 19-fold greater selectivity for  
340 CB2Rs than for CB1Rs [28], both of which are expressed in the BLA [29]. Finally, WIN is a biased  
341 CB1R agonist that exhibits lower efficacy to stimulate Gi/o- and Gq-coupled CB1Rs than the  
342 endocannabinoids, anandamide (**AEA**) and 2-arachydonoylglycerol (**2-AG**), but higher efficacy to  
343 stimulate arrestin-2-coupled CB1Rs than AEA [30]. In conclusion, differential recruitment of  
344 distinct CB1R- and CB2R-bearing cell populations and CB1Rs with different effector systems,  
345 may contribute to the inconsistencies between the effects of WIN and AM251 in the present study  
346 as well as to the discrepancies in the effects of WIN across various fear-memory reconsolidation  
347 paradigms.

348 It has been well documented that exposure to drug-associated stimuli triggers HPA axis  
349 activation in cocaine users [31] and cocaine-trained rats [16, 32]. Furthermore, stress-induced  
350 reductions in endocannabinoid tone in the BLA facilitate HPA axis activation [17, 33]. In the  
351 present study, drug context-induced cocaine-memory retrieval resulted in a significant increase  
352 in serum corticosterone concentrations compared to two control conditions: re-exposure to the  
353 extinction context or the home cage (**Fig. 5**). Furthermore, there was a direct relationship between  
354 serum corticosterone concentrations and cocaine-seeking behavior during the memory retrieval  
355 session (**Fig. 5**). The magnitude of the corticosterone response was comparable to those  
356 observed upon exposure to cocaine-paired contextual stimuli [32] or mild stressors [34], such as  
357 elevated platform stress [35] and restraint stress [36], in previous studies.

358 Remarkably, intra-BLA AM251 administration prolonged the drug context-induced  
359 corticosterone response during memory reconsolidation (i.e., after cocaine-memory retrieval)  
360 relative to VEH (**Fig. 5**), while it did not alter corticosterone secretion following no-memory  
361 retrieval. These findings are consistent with extant literature indicating that intra-BLA AM251

362 treatment alone is not anxiogenic [37], and it selectively enhances stress-induced, but not  
363 baseline, serum corticosterone concentrations [17]. Therefore, in the present study, intra-BLA  
364 AM251 administration might prolong a memory retrieval-induced arousal state that increased the  
365 strength of reconsolidating cocaine memories or the efficiency of memory reconsolidation.  
366 Accordingly, BLA CB1R signaling may gate memory strength and protect against the  
367 development of maladaptively strong and intrusive cocaine memories.

368         The contributions of specific endocannabinoids, including AEA and 2-AG, to CB1R-  
369 mediated effects on cocaine-memory reconsolidation have yet to be determined, but some  
370 insights may be gained from the stress literature. Upon exposure to a stressor, *AEA tone*  
371 *diminishes* in the BLA, due to corticotropin-releasing factor (**CRF**)-induced stimulation of AEA  
372 hydrolysis [38]. This leads to delayed, *phasic 2-AG release* due to the disinhibition of BLA  
373 glutamatergic principal neurons [39-40] and thus metabotropic glutamate receptor-mediated, as  
374 well as glucocorticoid receptor-mediated, stimulation of 2-AG synthesis [40-42]. Similar to  
375 stressors, cocaine-memory retrieval stimulates HPA axis activity [16] (**Fig. 5**), and it likely reduces  
376 AEA levels and increases 2-AG levels in the BLA during reconsolidation. As a CB1R antagonist,  
377 AM251 in the BLA inhibits 2-AG and AEA signaling and, as such, augments the impact of cocaine-  
378 memory retrieval on HPA axis activity, as indicated by the potentiated corticosterone response  
379 (**Fig. 5**). The resulting increase in BLA principal neuronal activity during memory reconsolidation  
380 may enhance cocaine-memory strength or storage efficiency, similar to fear memory  
381 consolidation [43]. Future studies will need to determine whether memory retrieval-induced  
382 alterations in BLA AEA, 2-AG, or both are critical for this phenomenon.

## 383 **CONCLUSIONS**

384         While intra-BLA AM251 administration *enhanced*, systemic AM251 administration in our  
385 previous study *impaired* [7], cocaine-memory strength or reconsolidation efficiency. These  
386 findings indicate that functionally heterogeneous CB1Rs populations bidirectionally regulate



387 cocaine-memory strength or reconsolidation as components of larger neural circuits. Although  
388 intra-BLA AM251 prolonged the memory retrieval-induced increase in blood serum corticosterone  
389 concentrations, it is unlikely that corticosterone mediated the effects on memory strength within  
390 the BLA, because we have previously shown that intra-BLA glucocorticoid receptor antagonism  
391 *enhances* cocaine-memory reconsolidation [16]. Instead, CRF and/or norepinephrine may  
392 mediate the effects of BLA AM251 on memory reconsolidation, in the course of HPA axis  
393 stimulation. In support of this alternative, stressors elicit an increase in CRF immunoreactivity [44]  
394 and norepinephrine release in the BLA [45-46]. Furthermore, intra-BLA CRH receptor type 1  
395 (Fuchs and Ritchie, unpublished) or  $\beta$ -adrenergic receptor antagonism disrupts cocaine-memory  
396 reconsolidation ([47]; Fuchs and Higginbotham, unpublished).

397         Based on the emerging role of CB1Rs in memory reconsolidation, CB1R genetic  
398 polymorphisms and other factors that lead to abnormalities in CB1R signaling may regulate an  
399 individual's susceptibility to SUDs and other psychiatric disorders that are characterized by  
400 pathologically strong maladaptive memories. Moreover, dysfunction of endocannabinoid  
401 recruitment upon exposure to drug-associated environmental stimuli and during subsequent drug-  
402 memory retrieval and reconsolidation may influence subsequent drug-relapse propensity.  
403 Interfering with neural mechanisms that enhance cocaine-memory strength during  
404 reconsolidation may be a useful adjunct to other approaches for drug-relapse prevention.

405

406 **Funding and Disclosure:** The authors have no competing financial interests in relation to the  
407 work described. This research was funded by NIDA R01 DA025646 (RAF), NIDA F31 DA 045430  
408 (JAH), and Washington State Initiative 171 (JAH) and 502 (RAF) funds administered through the  
409 Alcohol and Drug Abuse Research Program.

410



411 **Acknowledgments:** The authors are grateful to Shi Min Tan and Ethan Hansen for excellent  
412 technical assistance as well as to Dr. Anthony Berger for help with the corticosterone assays.

413

414 **Author Contributions:** JAH and RAF developed the study concept and experimental design;  
415 JAH, NMJ, RJM, and RAF collected the data; JAH, RAF, and RJM analyzed and interpreted the  
416 data; JAH and RAF wrote the manuscript with input from all authors. All authors have approved  
417 the version of the manuscript submitted for publication.

418

419 **REFERENCES**

- 420 1. Childress AR, McLellan TA, Ehrman R, O'Brien CP. Classically conditioned responses in opioid  
421 and cocaine dependence: A role in relapse. *NIDA Res Monogr.* 1988;85:25–43.
- 422 2. Childress AR, Mozley PD, McElgin W, Fitzgerald J, Reivich M, O'Brien CP. Limbic activation  
423 during cue-induced cocaine craving. *Am J Psychiatry* 1999;156:11–8.
- 424 3. Crombag HS, Bossert JM, Koya E, Shaham Y. Review. Context-induced relapse to drug  
425 seeking: a review. *Philos Trans R Soc Lond B Biol Sci.* 2008;363:3233–43.
- 426 4. Nader K, Schafe GE, Le Doux JE. Fear memories require protein synthesis in the amygdala  
427 for reconsolidation after retrieval. *Nature* 2000;406:722–726.
- 428 5. Rich MT, Torregrossa MM. Molecular and synaptic mechanisms regulating drug-associated  
429 memories: Towards a bidirectional treatment strategy. *Brain Res Bull.* 2018;141:58–71.
- 430 6. Sorg BA. Reconsolidation of drug memories. *Neurosci Biobehav Rev.* 2012;36:1400–1417.
- 431 7. Higginbotham JA, Wang R, Richardson BD, Shiina H, Tan SM, Presker MA, et al. CB1 receptor  
432 signaling modulates amygdalar plasticity during memory reconsolidation to promote  
433 subsequent context-induced reinstatement of cocaine-seeking. *J Neurosci.* In revision.  
434 doi:10.1101/2020.06.02.130419
- 435 8. Fuchs RA, Bell GH, Ramirez DR, Eaddy JL, Su Z. Basolateral amygdala involvement in  
436 memory reconsolidation processes that facilitate drug context-induced cocaine seeking. *Eur*  
437 *J Neurosci.* 2009;30:889–900.
- 438 9. Lee JLC, Di Ciano P, Thomas KL, Everitt BJ. Disrupting reconsolidation of drug memories  
439 reduces cocaine-seeking behavior. *Neuron* 2005;47:795–801.

- 440 10. Lee JLC, Milton AL, Everitt BJ. Cue-induced cocaine seeking and relapse are reduced by  
441 disruption of drug memory reconsolidation. *J Neurosci.* 2006;26:5881–5887.
- 442 11. Monsey MS, Ruiz SG, Taylor JR. Regulation of garcinol on histone acetylation in the amygdala  
443 and on the reconsolidation of a cocaine-associated memory. *Front Behav Neurosci.*  
444 2020;13:281.
- 445 12. Sanchez H, Quinn JJ, Torregrossa MM, Taylor JR. Reconsolidation of a cocaine-associated  
446 stimulus requires amygdalar protein kinase A. *J Neurosci.* 2010;30:4401–7.
- 447 13. Wells AM, Lasseter HC, Xie X, Cowhey KE, Reittinger AM, Fuchs RA. Interaction between  
448 the basolateral amygdala and dorsal hippocampus is critical for cocaine memory  
449 reconsolidation and subsequent drug context-induced cocaine-seeking behavior in rats.  
450 *Learn Mem.* 2011;18:693–702.
- 451 14. Lin HC, Mao SC, Gean PW. Effects of intra-amygdala infusion of CB1 receptor agonists on  
452 the reconsolidation of fear-potentiated startle. *Learn Mem.* 2006;13:316–321.
- 453 15. Ratano P, Everitt BJ, Milton AL. The CB1 receptor antagonist AM251 impairs reconsolidation  
454 of Pavlovian fear memory in the rat basolateral amygdala. *Neuropsychopharmacology.*  
455 2014;39:2529–37.
- 456 16. Stringfield SJ, Higginbotham JA, Wang R, Berger AL, McLaughlin RJ, Fuchs RA. Role of  
457 glucocorticoid receptor-mediated mechanisms in cocaine memory enhancement.  
458 *Neuropharmacology* 2017;123:349–358.
- 459 17. Hill MN, McLaughlin RJ, Morrish AC, Viau V, Floresco SB, Hillard CJ, et al. Suppression of  
460 amygdalar endocannabinoid signaling by stress contributes to activation of the  
461 hypothalamic-pituitary-adrenal axis. *Neuropsychopharmacology.* 2009;34:2733–45.

- 462 18. National Research Council. Guide for the Care and Use of Laboratory Animals: 3rd ed. The  
463 National Academies Press: Washington, DC; 2011.
- 464 19. Fuchs RA, Eaddy JL, Su ZI, Bell GH. Interactions of the basolateral amygdala with the dorsal  
465 hippocampus and dorsomedial prefrontal cortex regulate drug context-induced  
466 reinstatement of cocaine-seeking in rats. *Eur J Neurosci.* 2007;26:487–498.
- 467 20. Ortinski PI, Vassoler FM, Carlson GC, Pierce RC. Temporally dependent changes in cocaine-  
468 induced synaptic plasticity in the nucleus accumbens shell are reversed by D1-like dopamine  
469 receptor stimulation. *Neuropsychopharmacology.* 2012;37:1671–82.
- 470 21. Wang H, Treadway T, Covey DP, Cheer JF, Lupica CR. Cocaine-induced endocannabinoid  
471 mobilization in the ventral tegmental area. *Cell Rep.* 2015;12:1997–2008.
- 472 22. Tronson NC, Taylor JR. Molecular mechanisms of memory reconsolidation. *Nat Rev Neurosci.*  
473 2007;8:262–275.
- 474 23. Hashemizadeh S, Sardari M, Rezayof A. Basolateral amygdala CB1 cannabinoid receptors  
475 mediate nicotine-induced place preference. *Prog Neuropsychopharmacol Biol Psychiatry.*  
476 2014;51:65–71.
- 477 24. Campolongo P, Morena M, Scaccianoce S, Trezza V, Chiarotti F, Schelling G, et al. Novelty-  
478 induced emotional arousal modulates cannabinoid effects on recognition memory and  
479 adrenocortical activity. *Neuropsychopharmacology.* 2013;38:1276–1286.
- 480 25. Morena M, Campolongo P. The endocannabinoid system: An emotional buffer in the  
481 modulation of memory function. *Neurobiol Learn Mem.* 2014;112:30–43.
- 482 26. Morena M, Leitl KD, Vecchiarelli HA, Gray JM, Campolongo P, Hill MN. Emotional arousal  
483 state influences the ability of amygdalar endocannabinoid signaling to modulate anxiety.  
484 *Neuropharmacology.* 2016;111:59–69.

- 485 27. Zubedat S, Akirav I. The involvement of cannabinoids and mTOR in the reconsolidation of an  
486 emotional memory in the hippocampal-amygdala-insular circuit. *Eur*  
487 *Neuropsychopharmacol.* 2017;27:336–349.
- 488 28. Felder CC, Joyce KE, Briley EM, Mansouri J, Mackie K, Blond O, et al. Comparison of the  
489 pharmacology and signal transduction of the human cannabinoid CB1 and CB2 receptors.  
490 *Mol Pharmacol.* 1995;48:443–450.
- 491 29. Gong JP, Onaivi ES, Ishiguro H, Liu QR, Tagliaferro PA, Brusco A, et al. Cannabinoid CB2  
492 receptors: immunohistochemical localization in rat brain. *Brain Res.* 2006;1071:10–23.
- 493 30. Laprairie RB, Bagher AM, Kelly MEM, Dupré DJ, Denovan-Wright EM. Type 1 cannabinoid  
494 receptor ligands display functional selectivity in a cell culture model of striatal medium spiny  
495 projection neurons. *J Biol Chem.* 2014;289:24845–62.
- 496 31. Sinha R, Fuse T, Aubin LR, O'Malley SS. Psychological stress, drug-related cues and cocaine  
497 craving. *Psychopharmacology (Berl).* 2000;152:140-8.
- 498 32. De Vries AC, Taymans SE, Sundstrom JM, Pert A. Conditioned release of corticosterone by  
499 contextual stimuli associated with cocaine is mediated by corticotropin-releasing factor. *Brain*  
500 *Res.* 1998;786:39–46.
- 501 33. Hill MN, Tasker JG. Endocannabinoid signaling, glucocorticoid-mediated negative feedback,  
502 and regulation of the hypothalamic-pituitary-adrenal axis. *Neuroscience.* 2012;204:5–16.
- 503 34. Spencer RL, Deak T. A users guide to HPA axis research. *Physiol Behav.* 2017;178:43–65.
- 504 35. Sebastian V, Estil JB, Chen D, Schrott LM, Serrano PA. Acute physiological stress promotes  
505 clustering of synaptic markers and alters spine morphology in the hippocampus. *PLoS One.*  
506 2013;8:e79077.

- 507 36. Melia KR, Ryabinin AE, Schroeder R, Bloom FE, Wilson MC, Anokhin PK. Induction and  
508 habituation of immediate early gene expression in rat brain by acute and repeated restraint  
509 stress. *J Neurosci*. 1994;14:5929–5938.
- 510 37. Ganon-Elazar E, Akirav I. Cannabinoid receptor activation in the basolateral amygdala blocks  
511 the effects of stress on the conditioning and extinction of inhibitory avoidance. *J Neurosci*.  
512 2009;29:11078–11088.
- 513 38. Gray JM, Vecchiarelli HA, Morena M, Lee TTY, Hermanson DJ, Kim AB, et al. Corticotropin-  
514 releasing hormone drives anandamide hydrolysis in the amygdala to promote anxiety. *J*  
515 *Neurosci*. 2015;35:3879–3892.
- 516 39. Atsak P, Roozendaal B, Campolongo P. Role of the endocannabinoid system in regulating  
517 glucocorticoid effects on memory for emotional experiences. *Neuroscience*. 2012;204:104–  
518 116.
- 519 40. Bedse G, Hartley ND, Neale E, Gaulden AD, Patrick TA, Kingsley PJ, et al. Functional  
520 redundancy between canonical endocannabinoid signaling systems in the modulation of  
521 anxiety. *Biol Psychiatry*. 2017;82:488–499.
- 522 41. Rouach N, Nicoll RA. Endocannabinoids contribute to short-term but not long-term mGluR-  
523 induced depression in the hippocampus. *Eur J Neurosci*. 2003;18:1017–20.
- 524 42. Tasker JG, Di S, Malcher-Lopes R. Rapid glucocorticoid signaling via membrane-associated  
525 receptors. *Endocrinology*. 2006;147:5549–5556.
- 526 43. Pelletier JG, Likhtik E, Filali M, Paré D. Lasting increases in basolateral amygdala activity  
527 after emotional arousal: implications for facilitated consolidation of emotional memories.  
528 *Learn Mem*. 2005;12:96–102.

- 529 44. Roozendaal B, Brunson KL, Holloway BL, McGaugh JL, Baram TZ. Involvement of stress-  
530 released corticotropin-releasing hormone in the basolateral amygdala in regulating memory  
531 consolidation. *Proc Natl Acad Sci U S A*. 2002;99:13908–13913.
- 532 45. McReynolds JR, Donowho K, Abdi A, Mcgaugh JL, Roozendaal B, McIntyre CK. Memory-  
533 enhancing corticosterone treatment increases amygdala norepinephrine and Arc protein  
534 expression in hippocampal synaptic fractions. *Neurobiol Learn Mem*. 2010;93:312–321.
- 535 46. Tsigos C, Chrousos GP. Hypothalamic-pituitary-adrenal axis, neuroendocrine factors and  
536 stress. *J Psychosom Res*. 2002;53:865–871.
- 537 47. Otis JM, Dashew KB, Mueller D. Neurobiological dissociation of retrieval and reconsolidation  
538 of cocaine-associated memory. *J Neurosci*. 2013;33:1271–81a.
- 539
- 540

541 **Figure Captions**

542 **FIGURE 1. Intra-BLA AM251 administration during cocaine-memory reconsolidation**  
543 **increases drug context-induced cocaine seeking three days later. (A)** Experimental timeline.  
544 After cocaine self-administration training in one context (**COC CTX**), and extinction training in a  
545 different context (**EXT CTX**), rats received bilateral intra-BLA administration of the CB1R  
546 antagonist, AM251 (**AM**; 0.3 µg/0.5µL per hemisphere;  $n = 9$ ) or VEH ( $n = 11$ ) immediately after  
547 the 15-min cocaine-memory retrieval session (**RETRIEVAL**). After two additional extinction  
548 sessions in the EXT CTX with  $\leq 25$  active lever responses, cocaine-seeking behavior was tested  
549 in the COC CTX. **(B)** Schematic of cannula placements. Symbols represent the most ventral point  
550 of injection cannula tracts for rats that received VEH (*open circles*) or AM251 (*closed circles*). **(C)**  
551 Cocaine infusions and/or active- and inactive-lever responses (mean  $\pm$  SEM) during cocaine self-  
552 administration (last 10 d) and extinction training prior to AM251 or VEH treatment. **(D)** Active-lever  
553 responses (mean  $\pm$  SEM) at RETRIEVAL (before treatment) and upon first re-exposure to the  
554 EXT CTX and COC CTX after treatment. **(E)** Time course of active-lever responses (mean  $\pm$   
555 SEM) at test in the COC CTX. **(F)** Inactive-lever responses (mean  $\pm$  SEM) during RETRIEVAL  
556 and upon first re-exposure to the EXT CTX and COC CTX. **(G)** Time course of inactive-lever  
557 responses (mean  $\pm$  SEM) at test in the COC CTX. **Symbols:** ANOVA #context simple main effect,  
558 Sidak's test,  $p < 0.05$ ; \*treatment simple main effect, Sidak's test,  $p < 0.05$ ; †time simple main  
559 effect, Tukey's tests, intervals 1 > 2-6,  $p < 0.05$ ; \*treatment main effect,  $p < 0.05$ .

560

561 **FIGURE 2. Intra-BLA AM251 administration after memory reconsolidation does not alter**  
562 **drug context-induced cocaine seeking three days later. (A)** Experimental timeline. After  
563 cocaine self-administration training in one context (**COC CTX**) and extinction training in a different  
564 context (**EXT CTX**), rats received bilateral intra-BLA administration of the CB1R antagonist,  
565 AM251 (**AM**; 0.3 µg/0.5µL per hemisphere;  $n = 8$ ) or VEH ( $n = 6$ ) six hours after the 15-min



566 cocaine-memory retrieval session (**RETRIEVAL**), after memory reconsolidation was completed.  
567 After two additional extinction sessions in the EXT CTX with  $\leq 25$  active lever responses, cocaine-  
568 seeking behavior was tested in the COC CTX. **(B)** Schematic of cannula placements. Symbols  
569 represent the most ventral point of injection cannula tracts for rats that received VEH (*open*  
570 *circles*) or AM251 (*closed circles*). **(C)** Cocaine infusions and/or active- and inactive-lever  
571 responses (mean  $\pm$  SEM) during cocaine self-administration (last 10 d) and extinction training  
572 prior to AM251 or VEH treatment. **(D)** Active-lever responses (mean  $\pm$  SEM) at RETRIEVAL  
573 (before treatment) and upon first re-exposure to the EXT CTX and COC CTX after treatment. **(E)**  
574 Time course of active-lever responses (mean  $\pm$  SEM) at test in the COC CTX. **(F)** Inactive-lever  
575 responses (mean  $\pm$  SEM) during RETRIEVAL and upon first re-exposure to the EXT CTX and  
576 COC CTX. **(G)** Time course of inactive-lever responses (mean  $\pm$  SEM) at test in the COC CTX.  
577 **Symbols:** ANOVA, #context main effect,  $p < 0.05$  \*time simple main effect, Tukey's tests, intervals  
578 1 > intervals 2-6,  $p < 0.05$ .

579

580 **FIGURE 3. Intra-pCPu AM251 administration during memory reconsolidation does not alter**  
581 **drug context-induced cocaine seeking three days later. (A)** Experimental timeline. After  
582 cocaine self-administration training in one context (**COC CTX**) and extinction training in a different  
583 context (**EXT CTX**), rats received bilateral intra-pCPu administration of the CB1R antagonist,  
584 AM251 (**AM**; 0.3  $\mu$ g/0.5 $\mu$ L per hemisphere;  $n = 9$ ) or VEH ( $n = 7$ ) immediately after the 15-min  
585 cocaine- memory retrieval session (**RETRIEVAL**). After two additional extinction sessions in the  
586 EXT CTX with  $\leq 25$  active lever responses, cocaine-seeking behavior was tested in the COC  
587 CTX. **(B)** Schematic of cannula placements. Symbols represent the most ventral point of injection  
588 cannula tracts for rats that received VEH (*open circles*) or AM251 (*closed circles*). **(C)** Cocaine  
589 infusions and/or active- and inactive-lever responses (mean  $\pm$  SEM) during cocaine self-  
590 administration (last 10 d) and extinction training prior to AM251 or VEH treatment. **(D)** Active-lever

591 responses (mean  $\pm$  SEM) at RETRIEVAL (before treatment) and upon first re-exposure to the  
592 EXT CTX and COC CTX after treatment. **(E)** Time course of active-lever responses (mean  $\pm$   
593 SEM) at test in the COC CTX. **(F)** Inactive-lever responses (mean  $\pm$  SEM) during RETRIEVAL  
594 and upon first re-exposure to the EXT CTX and COC CTX. **(G)** Time course of inactive-lever  
595 responses (mean  $\pm$  SEM) at test in the COC CTX. **Symbols:** ANOVA, #context main effect,  $p <$   
596 0.5; †time simple main effect, Tukey's tests, interval 1 > intervals 2-6,  $p < 0.05$ .

597

598 **FIGURE 4. Intra-BLA WIN 55,212-2 administration during memory reconsolidation does not**  
599 **alter drug context-induced cocaine seeking three days later. (A)** Experimental timeline. After  
600 cocaine self-administration training in one context (**COC CTX**) and extinction training in a different  
601 context (**EXT CTX**), rats received bilateral intra-BLA administration of the CB1R agonist, WIN  
602 55,212-2 (**WIN**; 0.5  $\mu$ g/0.5 $\mu$ L per hemisphere;  $n = 11$ ) or VEH ( $n = 11$ ) immediately after the 15-  
603 min cocaine-memory retrieval session (**RETRIEVAL**). After two additional extinction sessions in  
604 the EXT CTX with  $\leq 25$  active lever responses, cocaine-seeking behavior was tested in the COC  
605 CTX. **(B)** Schematic of cannula placements. Symbols represent the most ventral point of injection  
606 cannula tracts for rats that received VEH (*open circles*) or AM251 (*closed circles*). **(C)** Cocaine  
607 infusions and/or active- and inactive-lever responses (mean  $\pm$  SEM) during cocaine self-  
608 administration (last 10 d) and extinction training prior to AM251 or VEH treatment. **(D)** Active-lever  
609 responses (mean  $\pm$  SEM) at RETRIEVAL (before treatment) and upon first re-exposure to the  
610 EXT CTX and COC CTX after treatment. **(E)** Time course of active-lever responses (mean  $\pm$   
611 SEM) at test in the COC CTX. **(F)** Inactive-lever responses (mean  $\pm$  SEM) during RETRIEVAL  
612 and upon first re-exposure to the EXT CTX and COC CTX. **(G)** Time course of inactive-lever  
613 responses (mean  $\pm$  SEM) at test in the COC CTX. **Symbols:** ANOVA, #context main effect,  $p <$   
614 0.05; †time simple main effect, Tukey's tests, interval 1 > intervals 2-6,  $p < 0.05$ .

615

616 **FIGURE 5. Intra-BLA AM251 administration prolongs memory retrieval-induced increase in**  
617 **blood serum corticosterone concentrations during cocaine-memory reconsolidation. (A)**  
618 Experimental timeline. Rats received cocaine self-administration training in one context (**COC**  
619 **CTX**) and extinction training in a different context (**EXT CTX**). Rats were habituated to the tail-  
620 nick procedure before and after extinction session 6 (*gray symbols*). Blood samples (*red symbols*)  
621 were collected immediately prior to extinction session 7 (Baseline, **BL**), after extinction session 7  
622 (**POST-EXT**), after either the 15-min cocaine memory-retrieval session (**POST-RETRIEVAL**;  $n =$   
623  $11$ ) or comparable exposure to the home cage (**POST-HOME**;  $n = 11$ ), and after intra-BLA  
624 infusions of AM251 (**AM**;  $0.3 \mu\text{g}/0.5\mu\text{L}$  per hemisphere) or VEH at 30-minute intervals (**30, 60,**  
625 **90**). **(B)** Schematic of cannula placements in the BLA with symbols representing the most ventral  
626 point of injection cannula tracts for rats that were re-exposed to the COC CTX or home cage  
627 followed by VEH or AM251 treatment. **(C)** Cocaine infusions and/or active- and inactive-lever  
628 responses (mean  $\pm$  SEM) during cocaine self-administration (last 10 d) and extinction training  
629 prior to memory retrieval and treatment manipulations. **(D)** Significant direct relationship between  
630 active-lever responses during the memory-retrieval session and POST-RETRIEVAL  
631 corticosterone concentrations before treatment (Pearson's  $r$ ). **(E)** Blood serum corticosterone  
632 concentrations (mean  $\pm$  SEM) pre session (BASELINE), post session (POST-EXT, POST-EXT <  
633 POST-RETRIEVAL), and at 30, 60, and 90 min post treatment (AM251/retrieval > VEH/retrieval,  
634 AM251/home cage). **Symbols:** #one-way ANOVA, Tukey's tests,  $p < 0.05$ ; \*2 x 2 x 3 ANOVA,  
635 treatment simple main effects, Sidak's tests,  $p < 0.05$ ; †time simple main effect, Tukey's tests, 30-  
636 min time point > 60-min and 90-min time points,  $p < 0.05$ .



**A**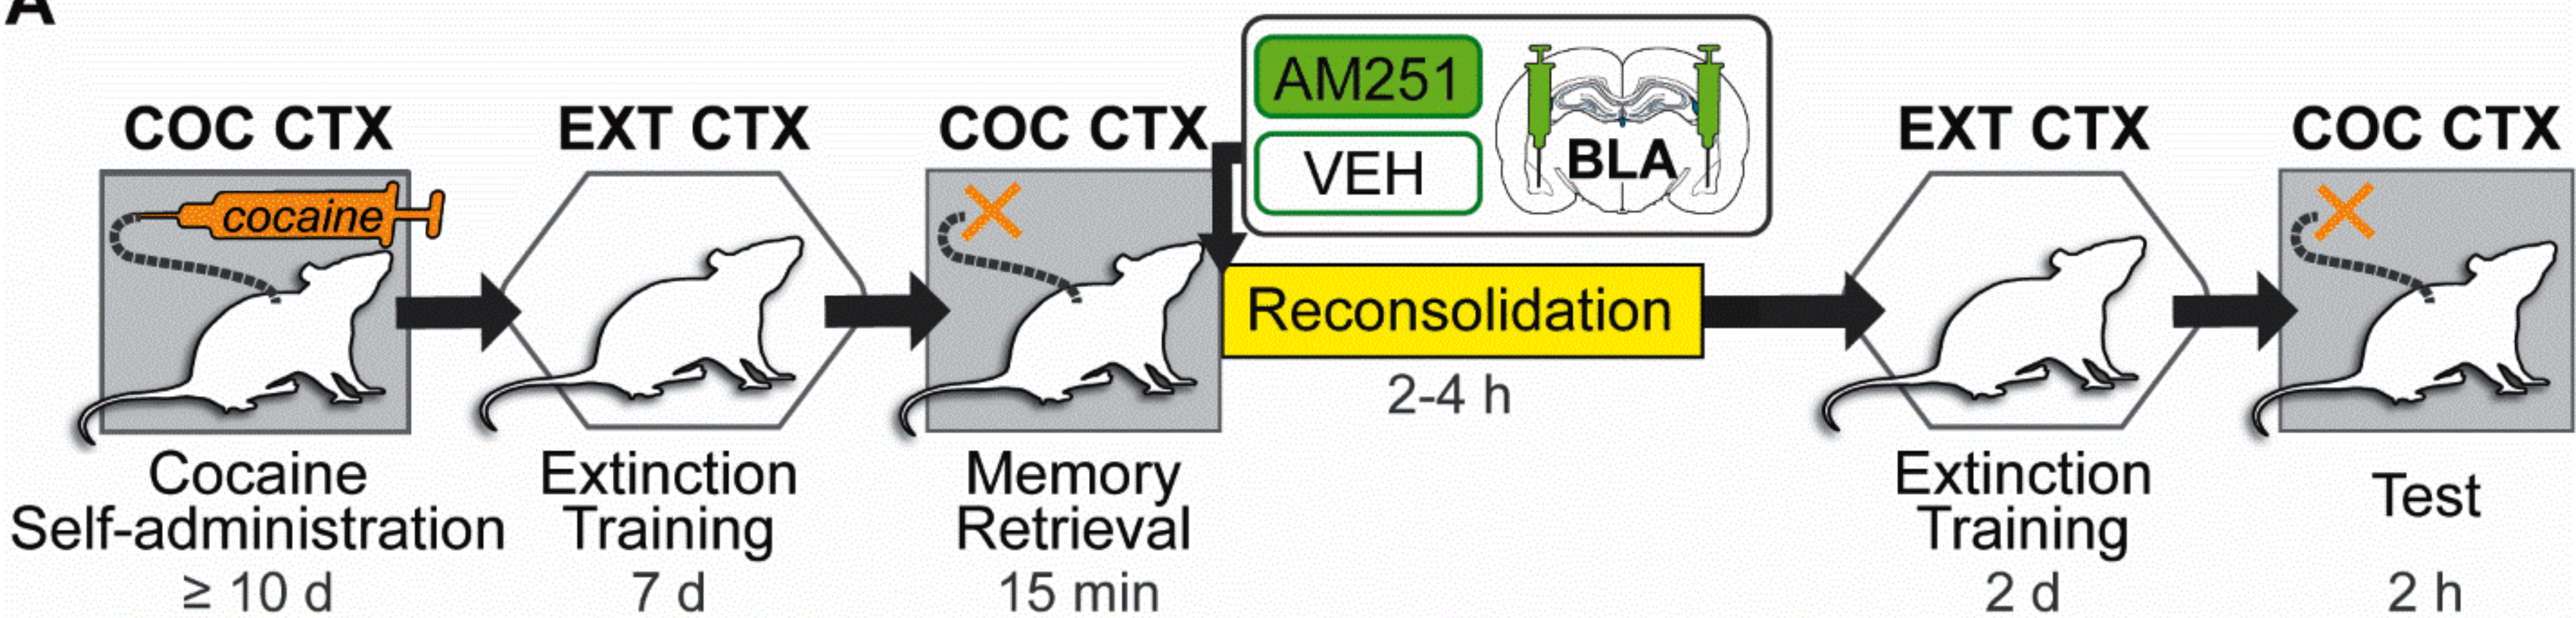**B**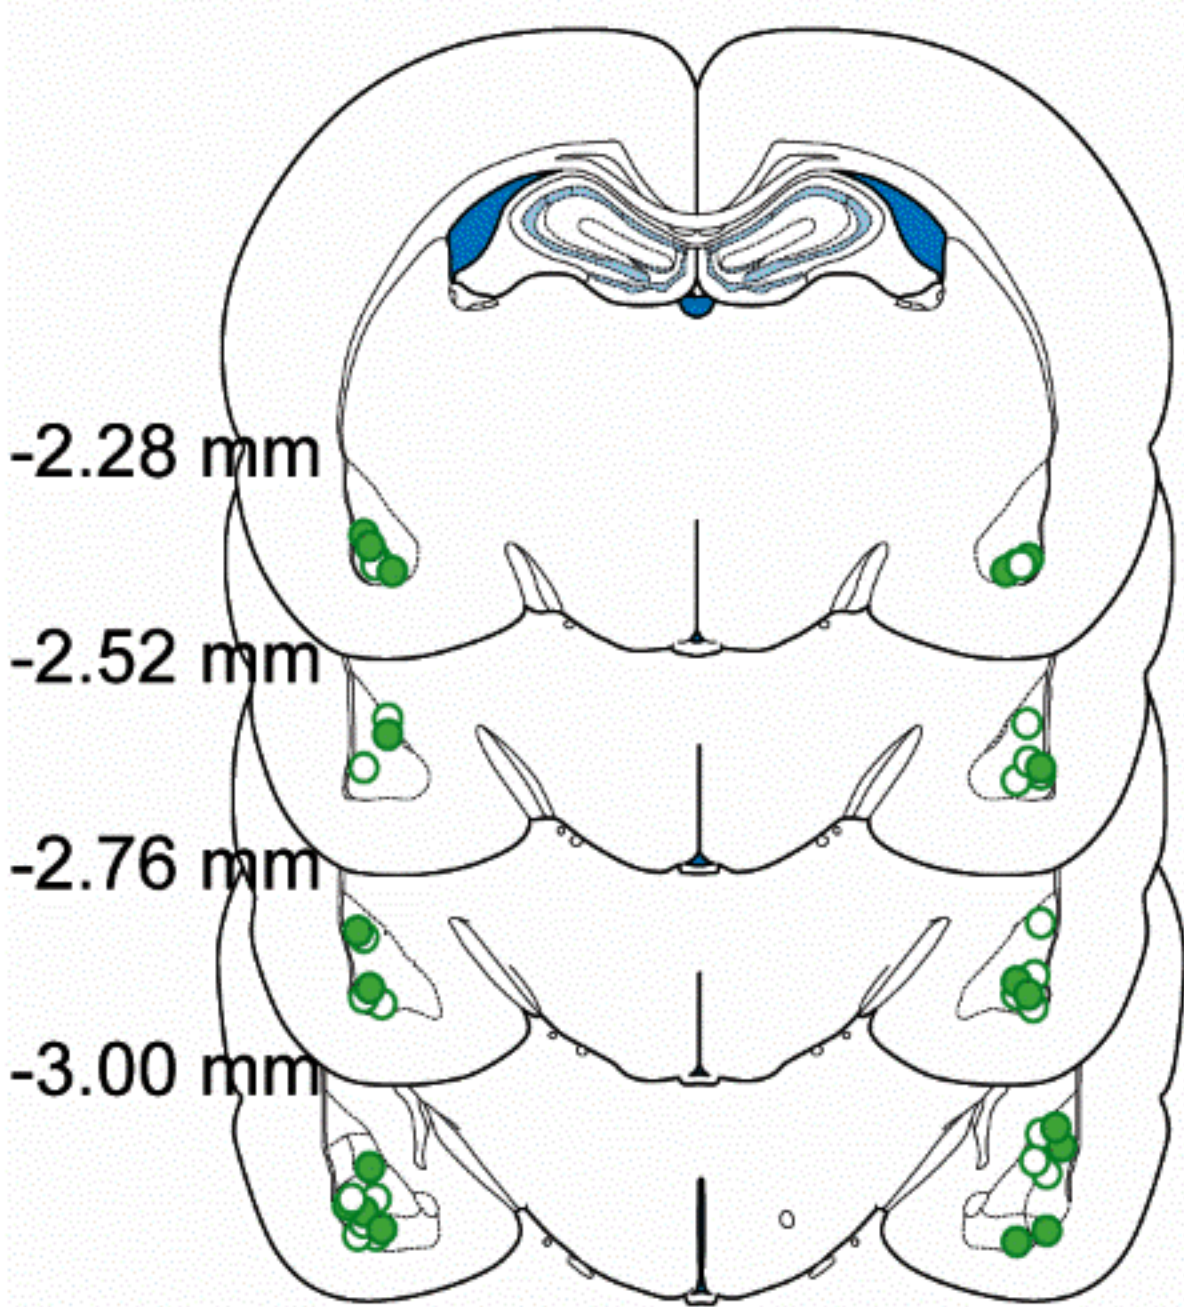**C**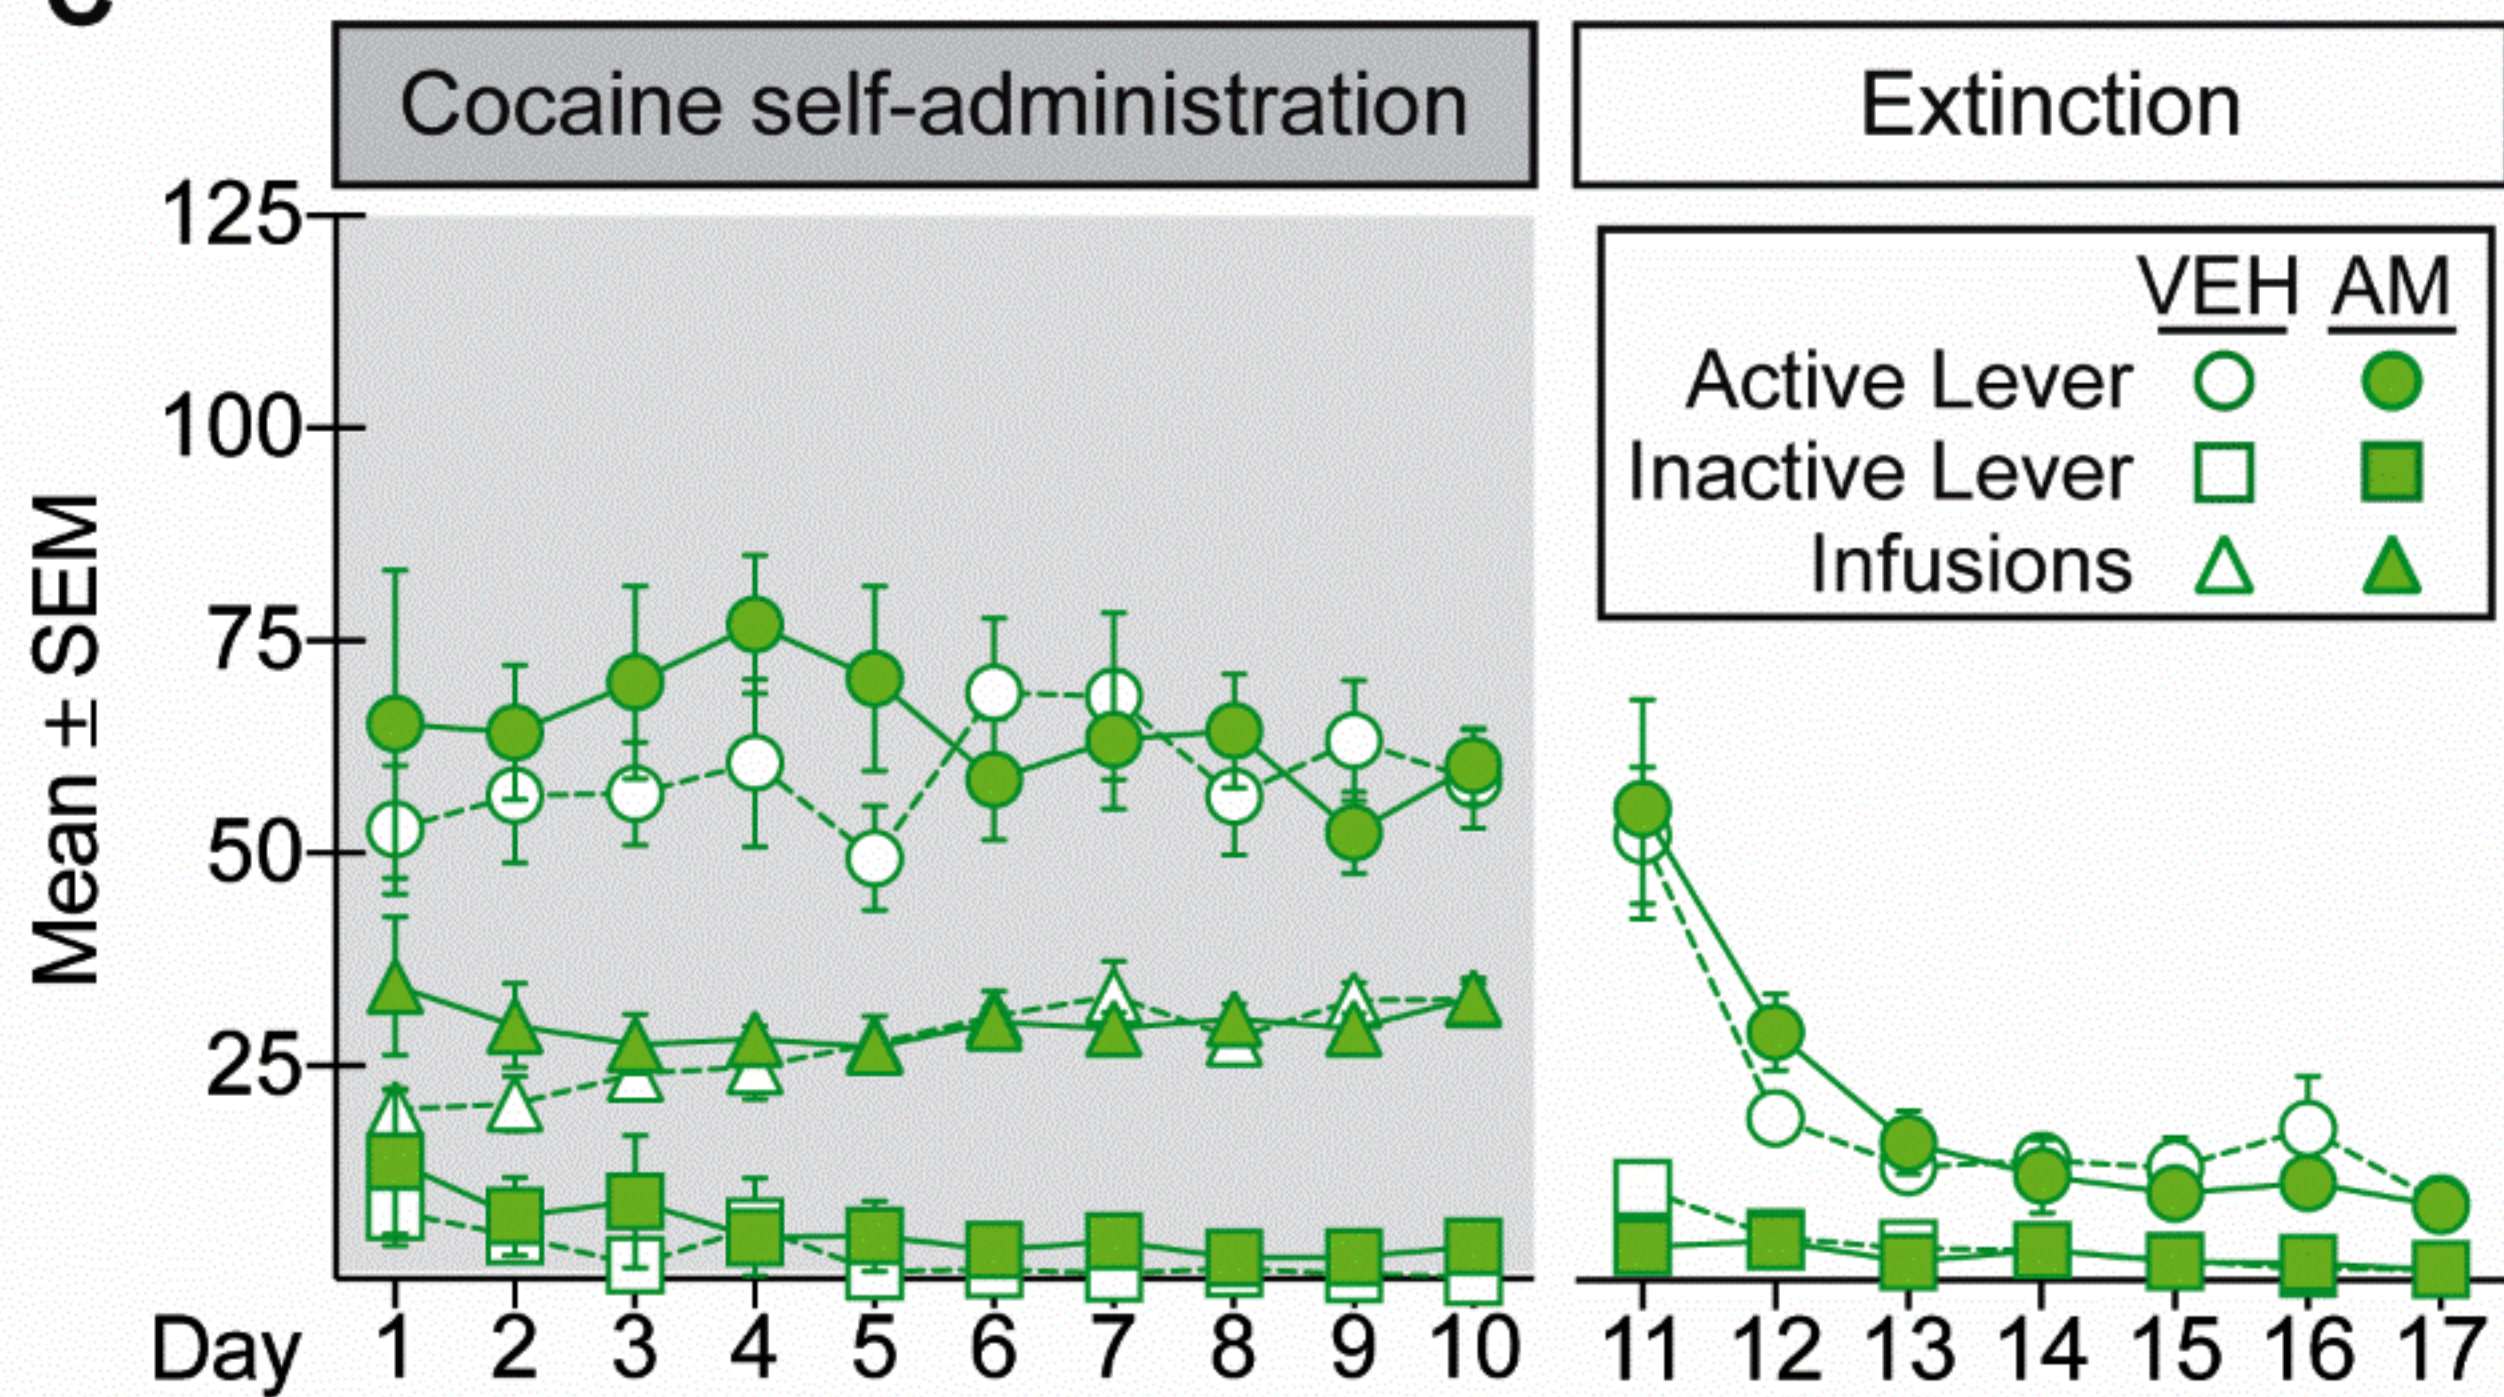**D**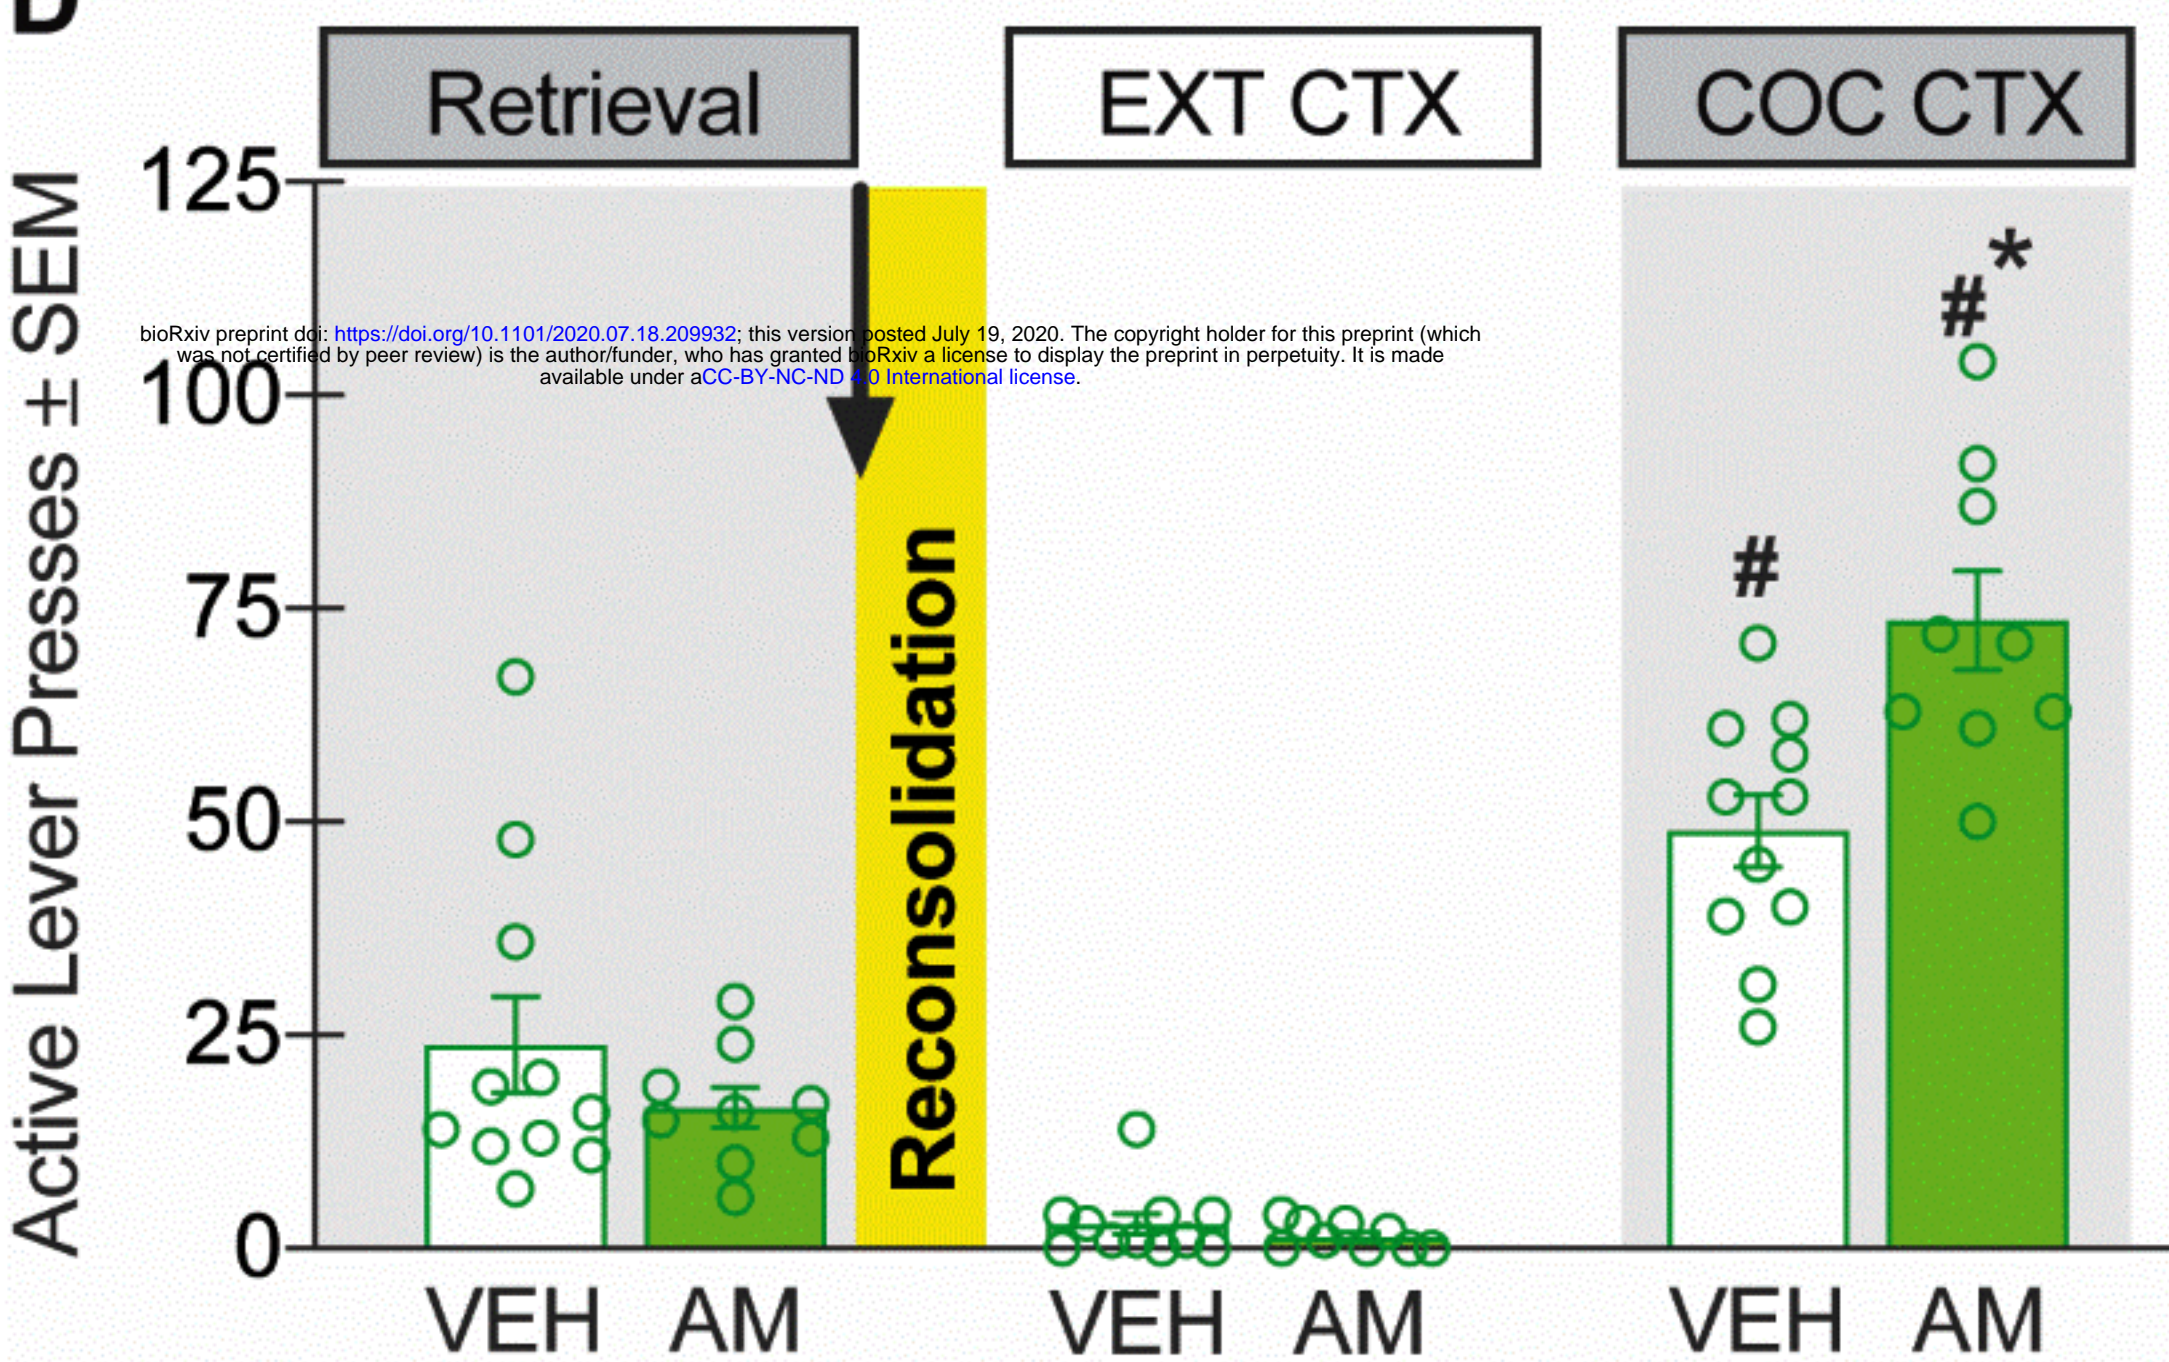**E**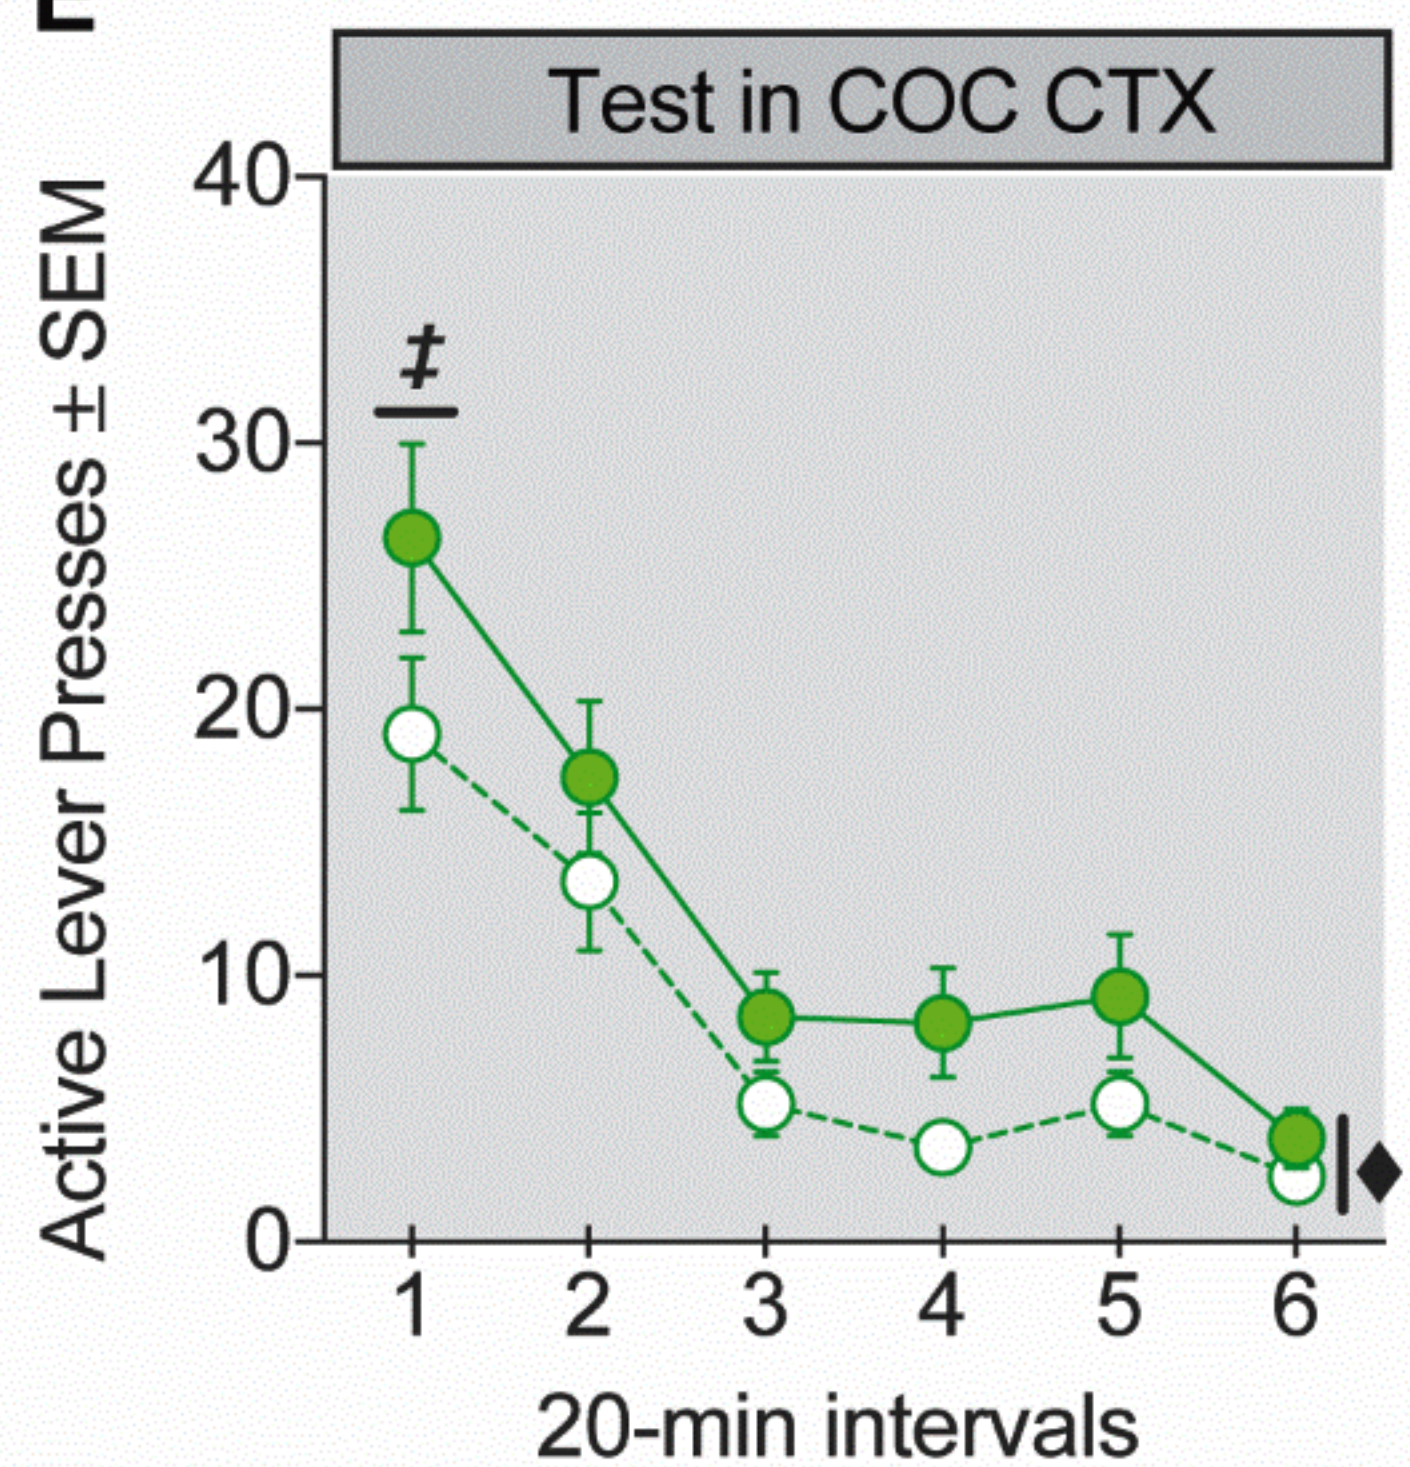**F**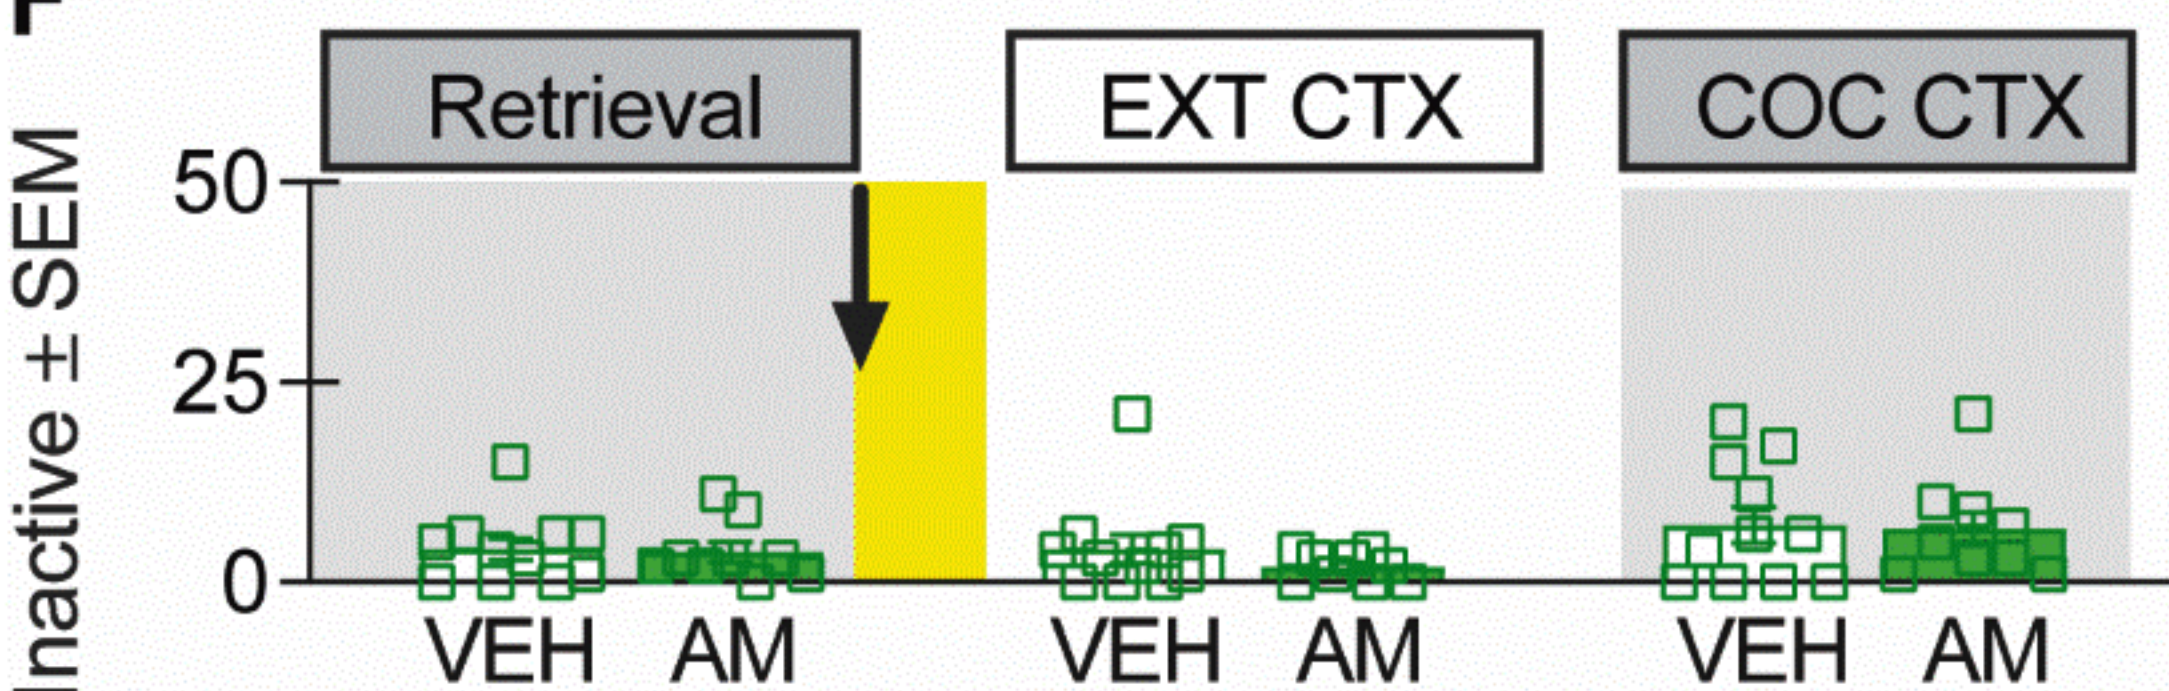**G**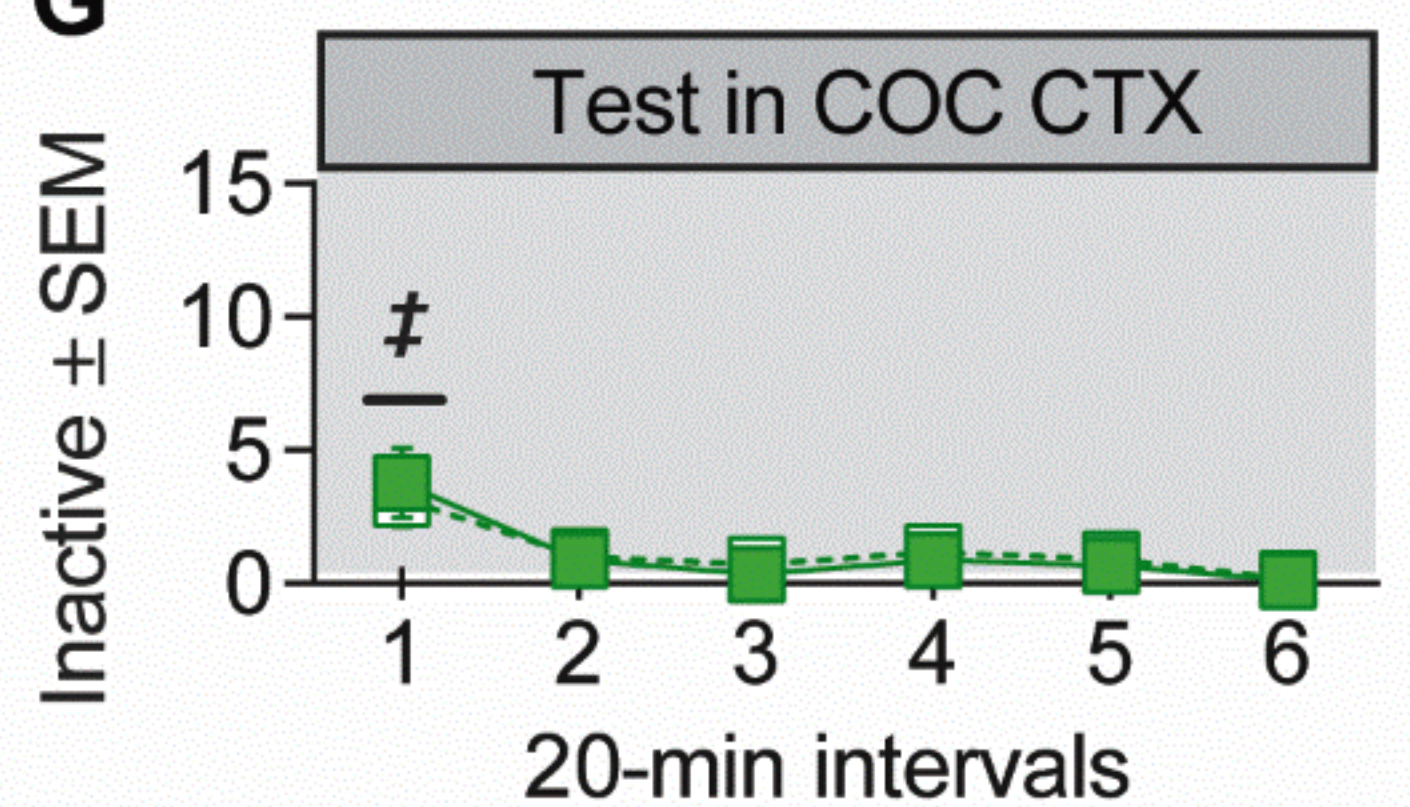



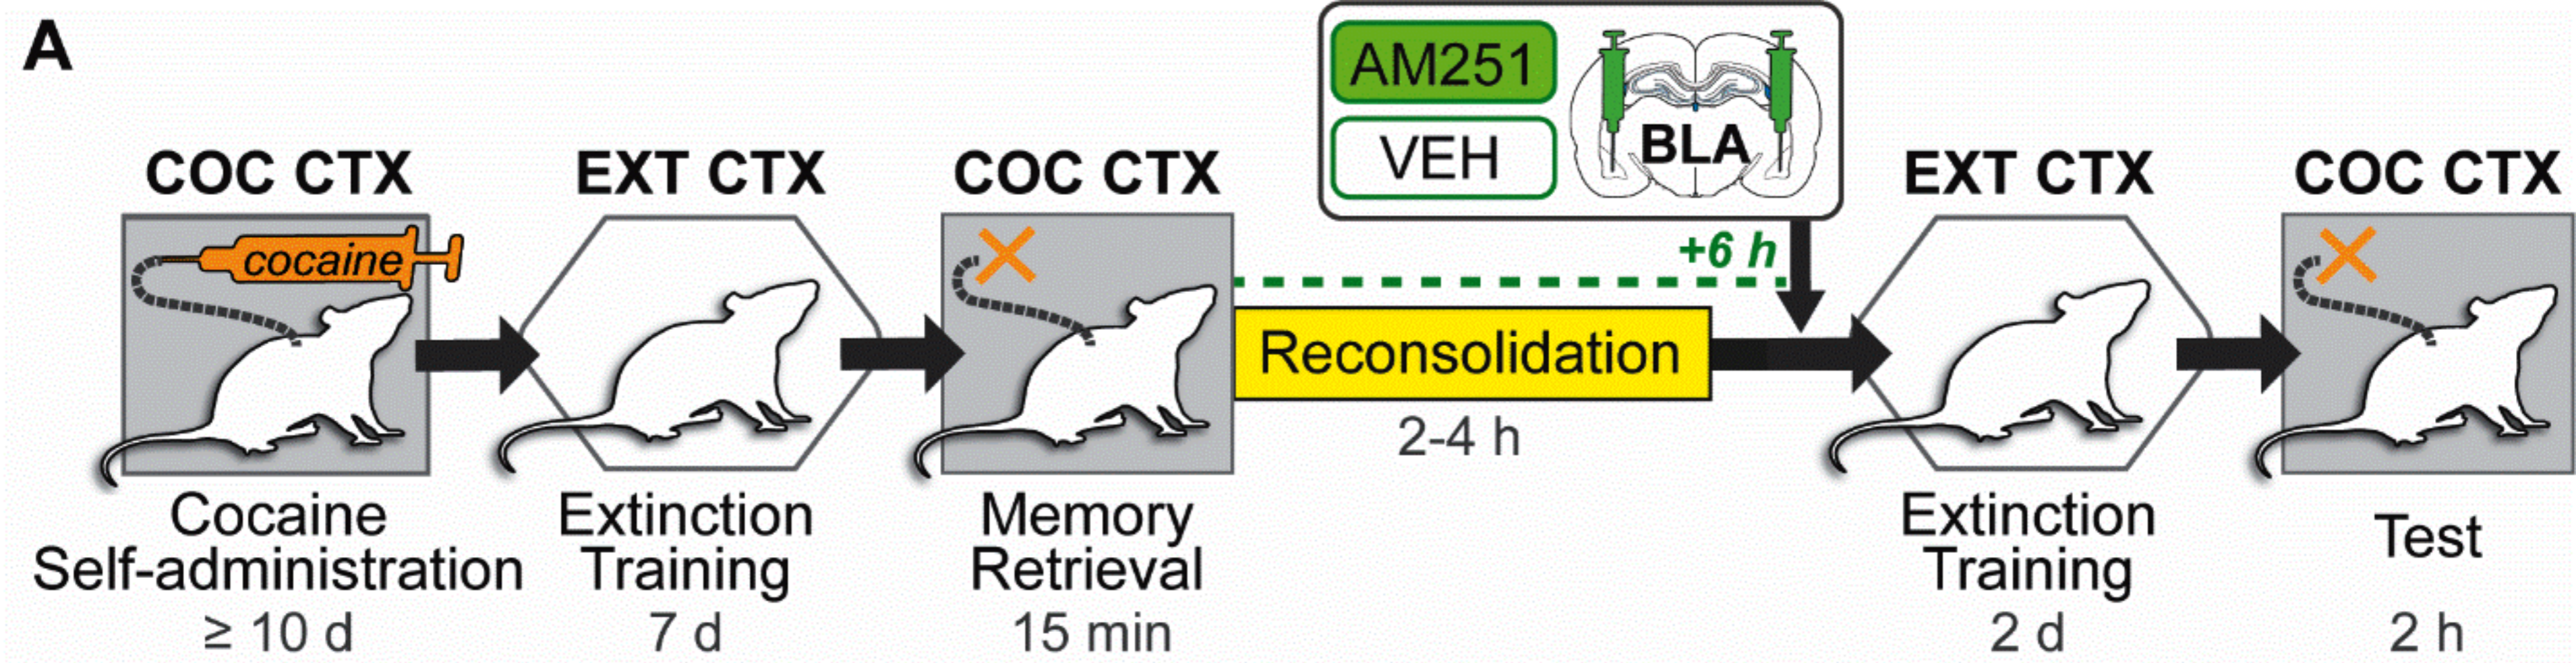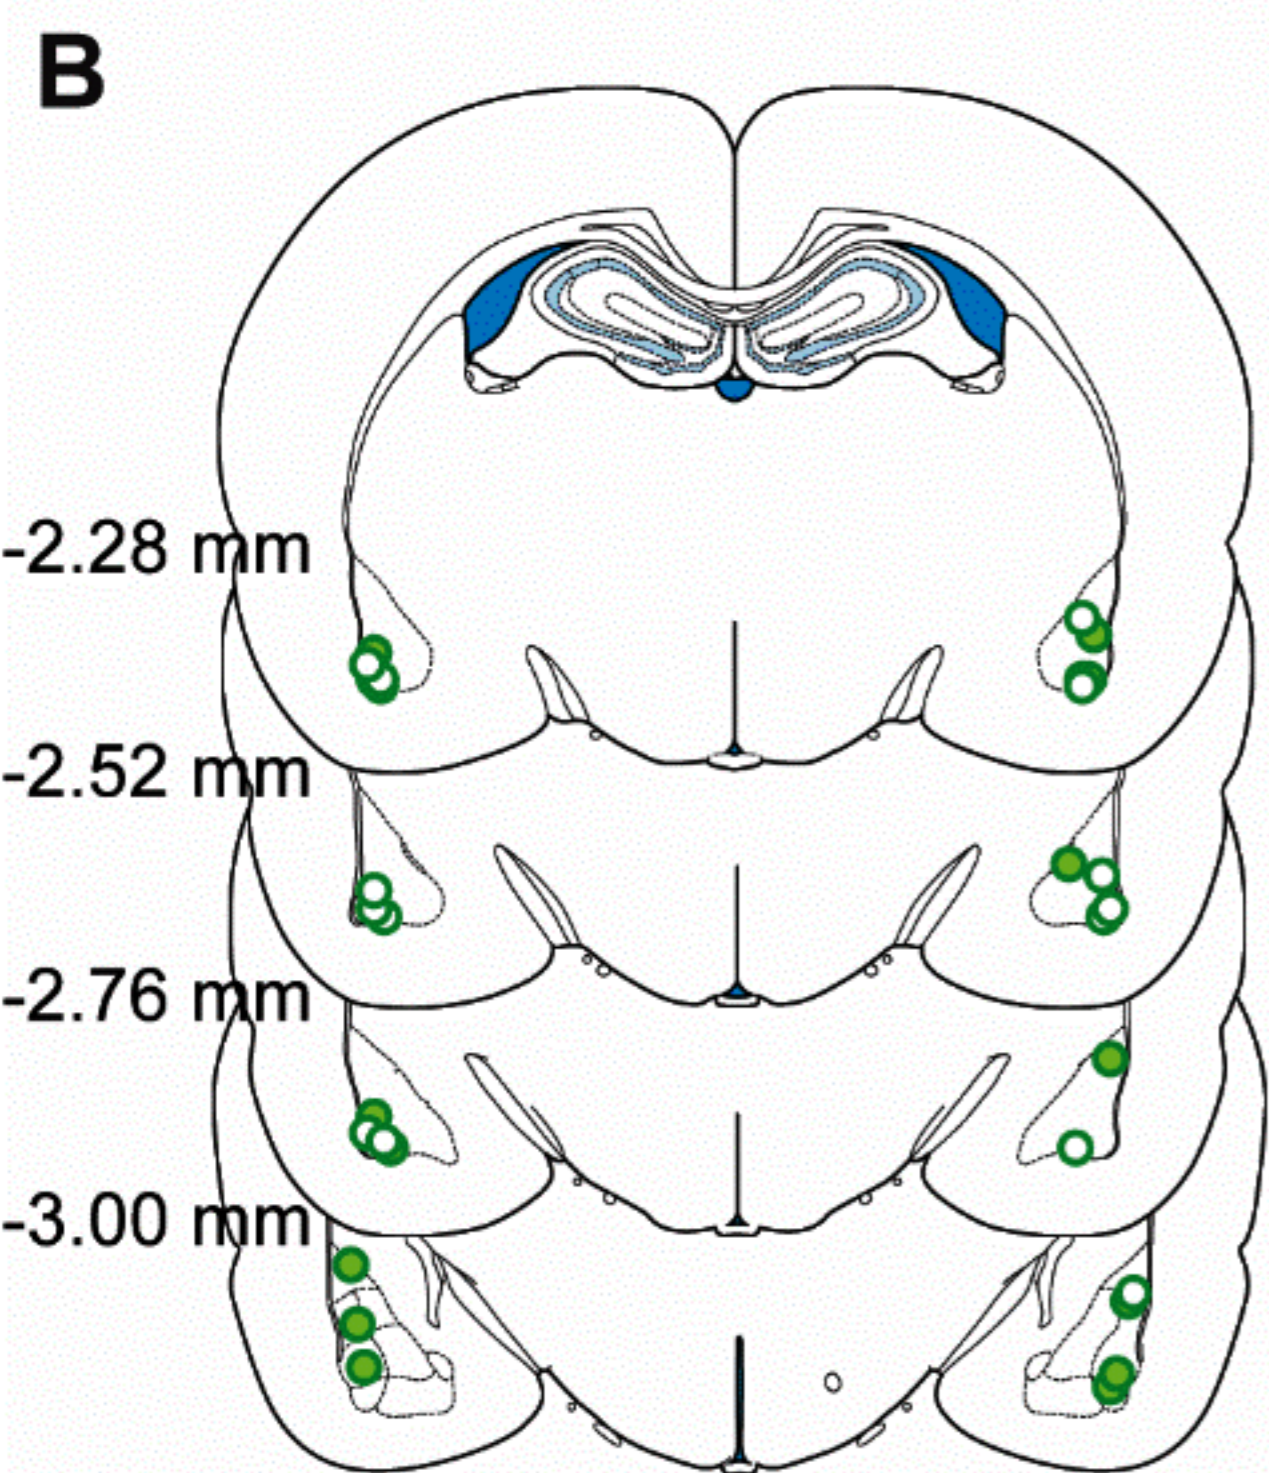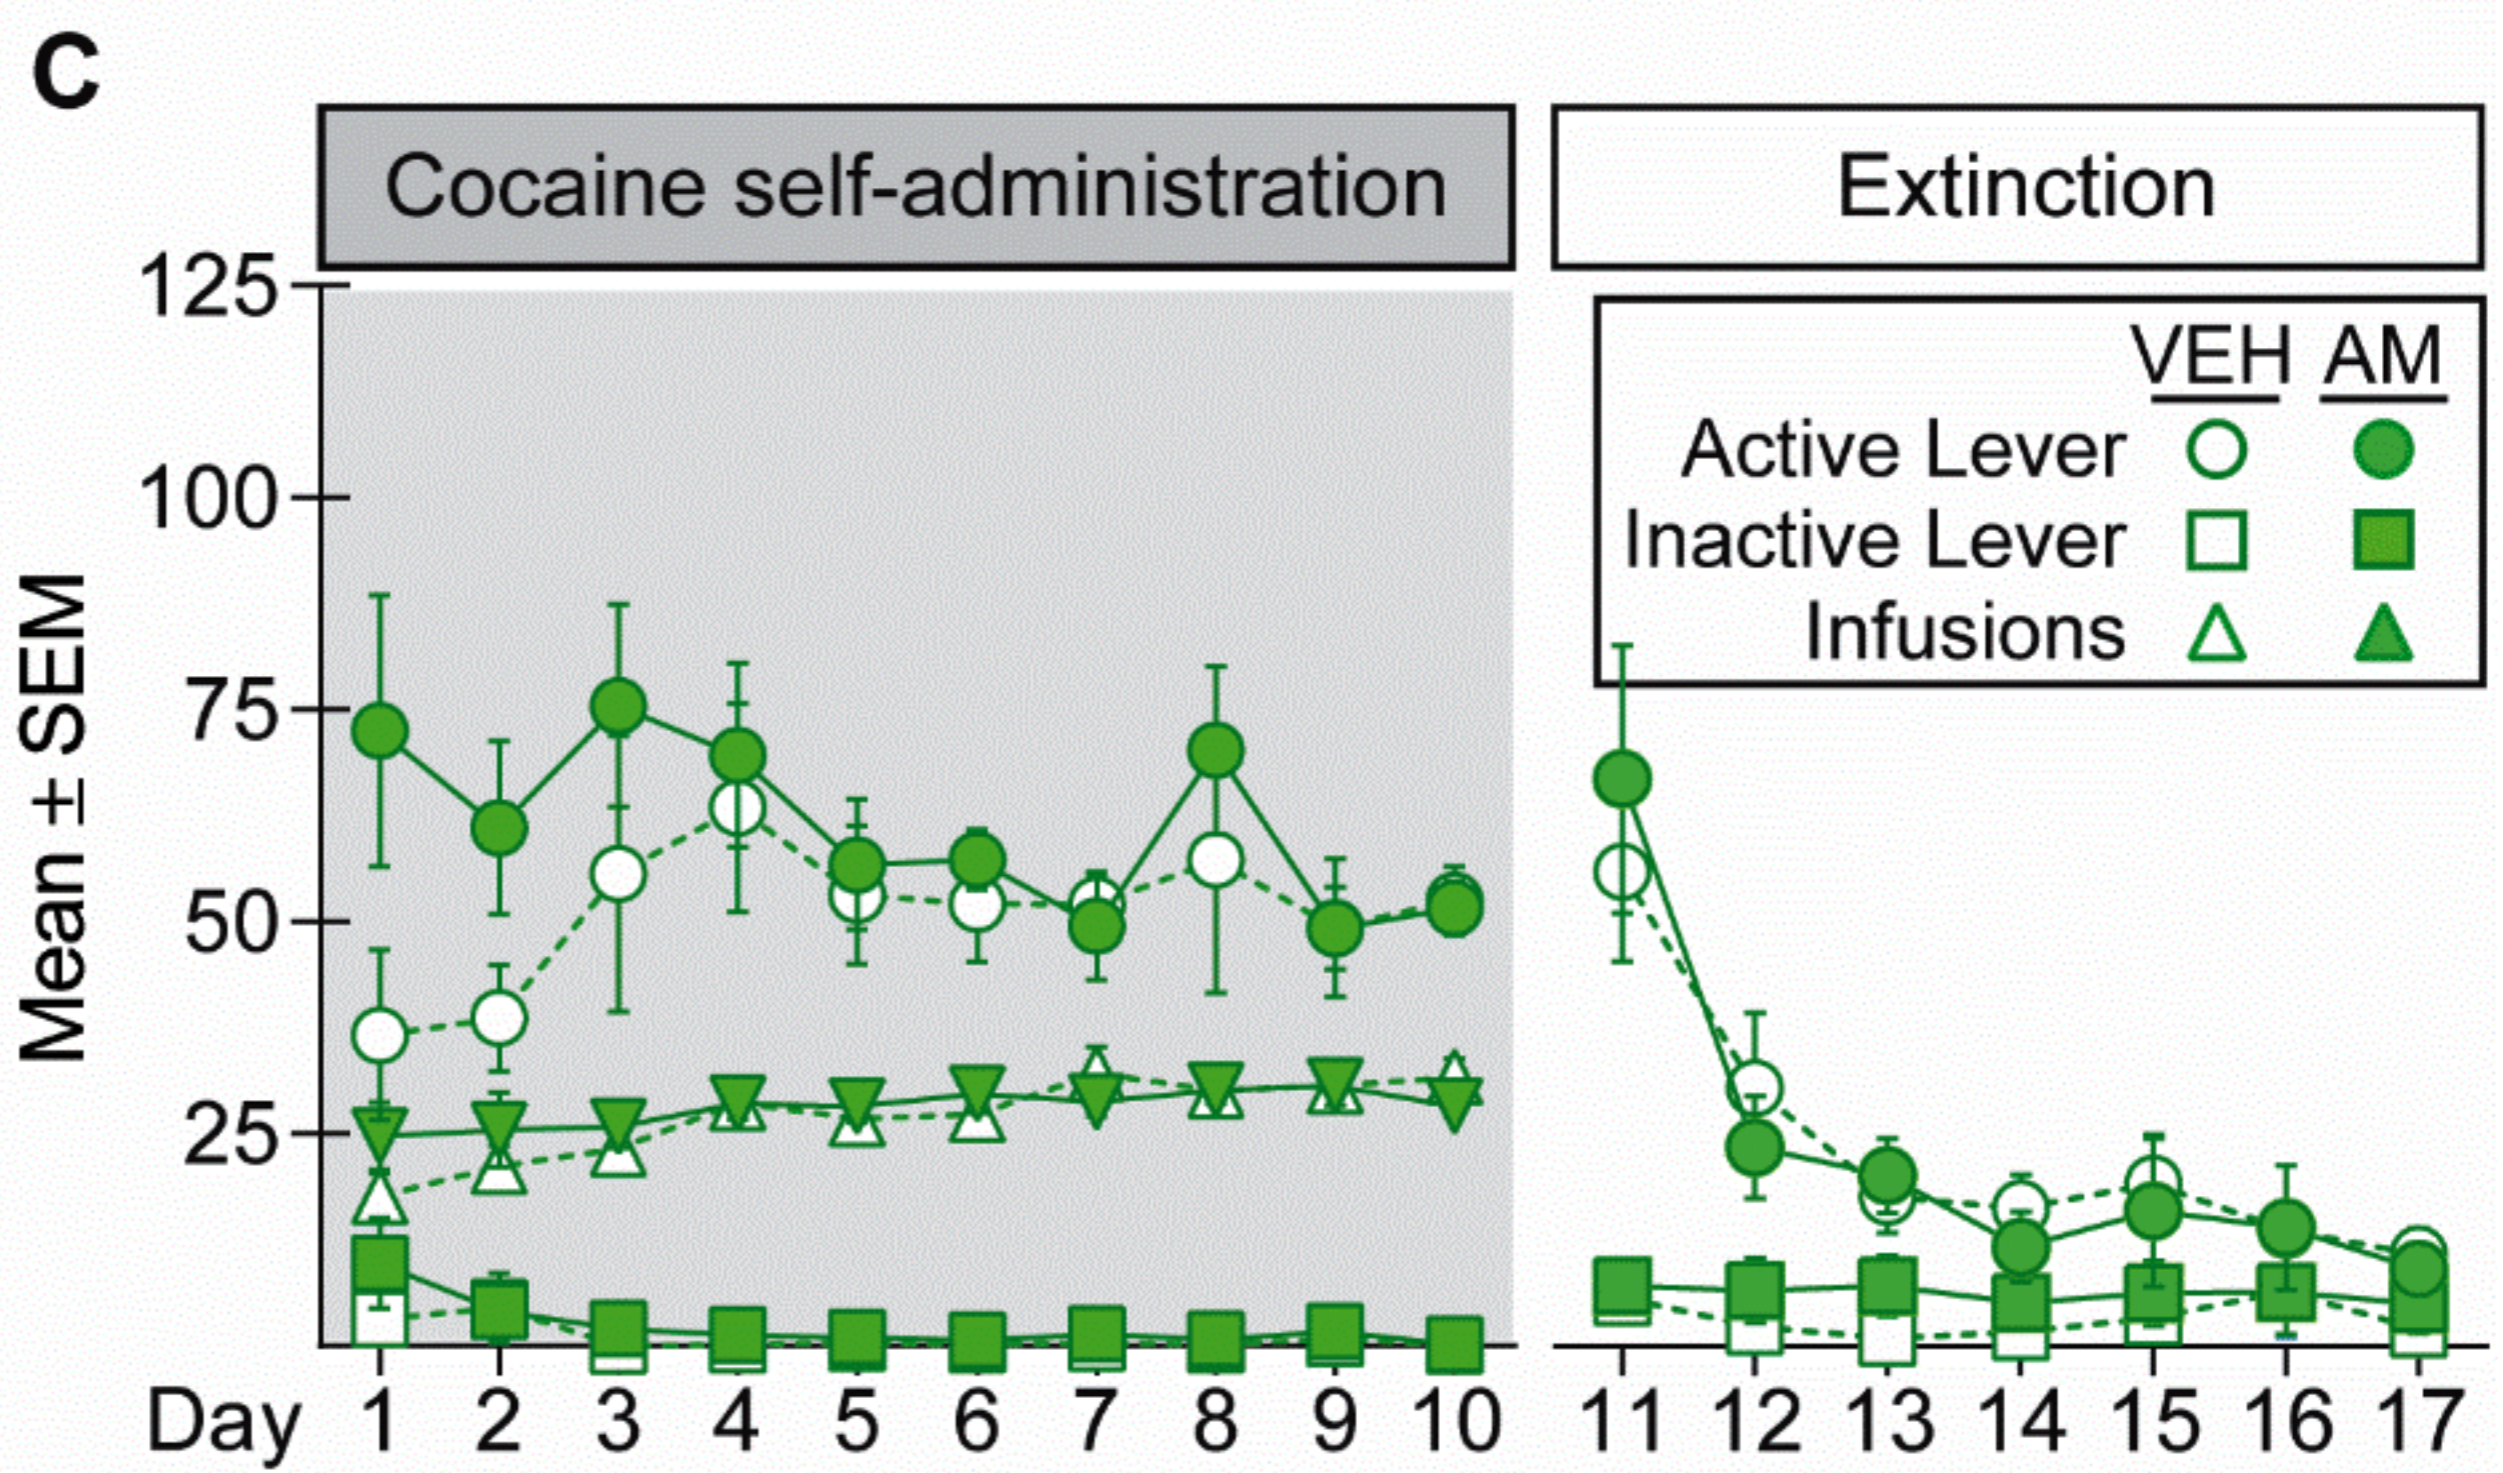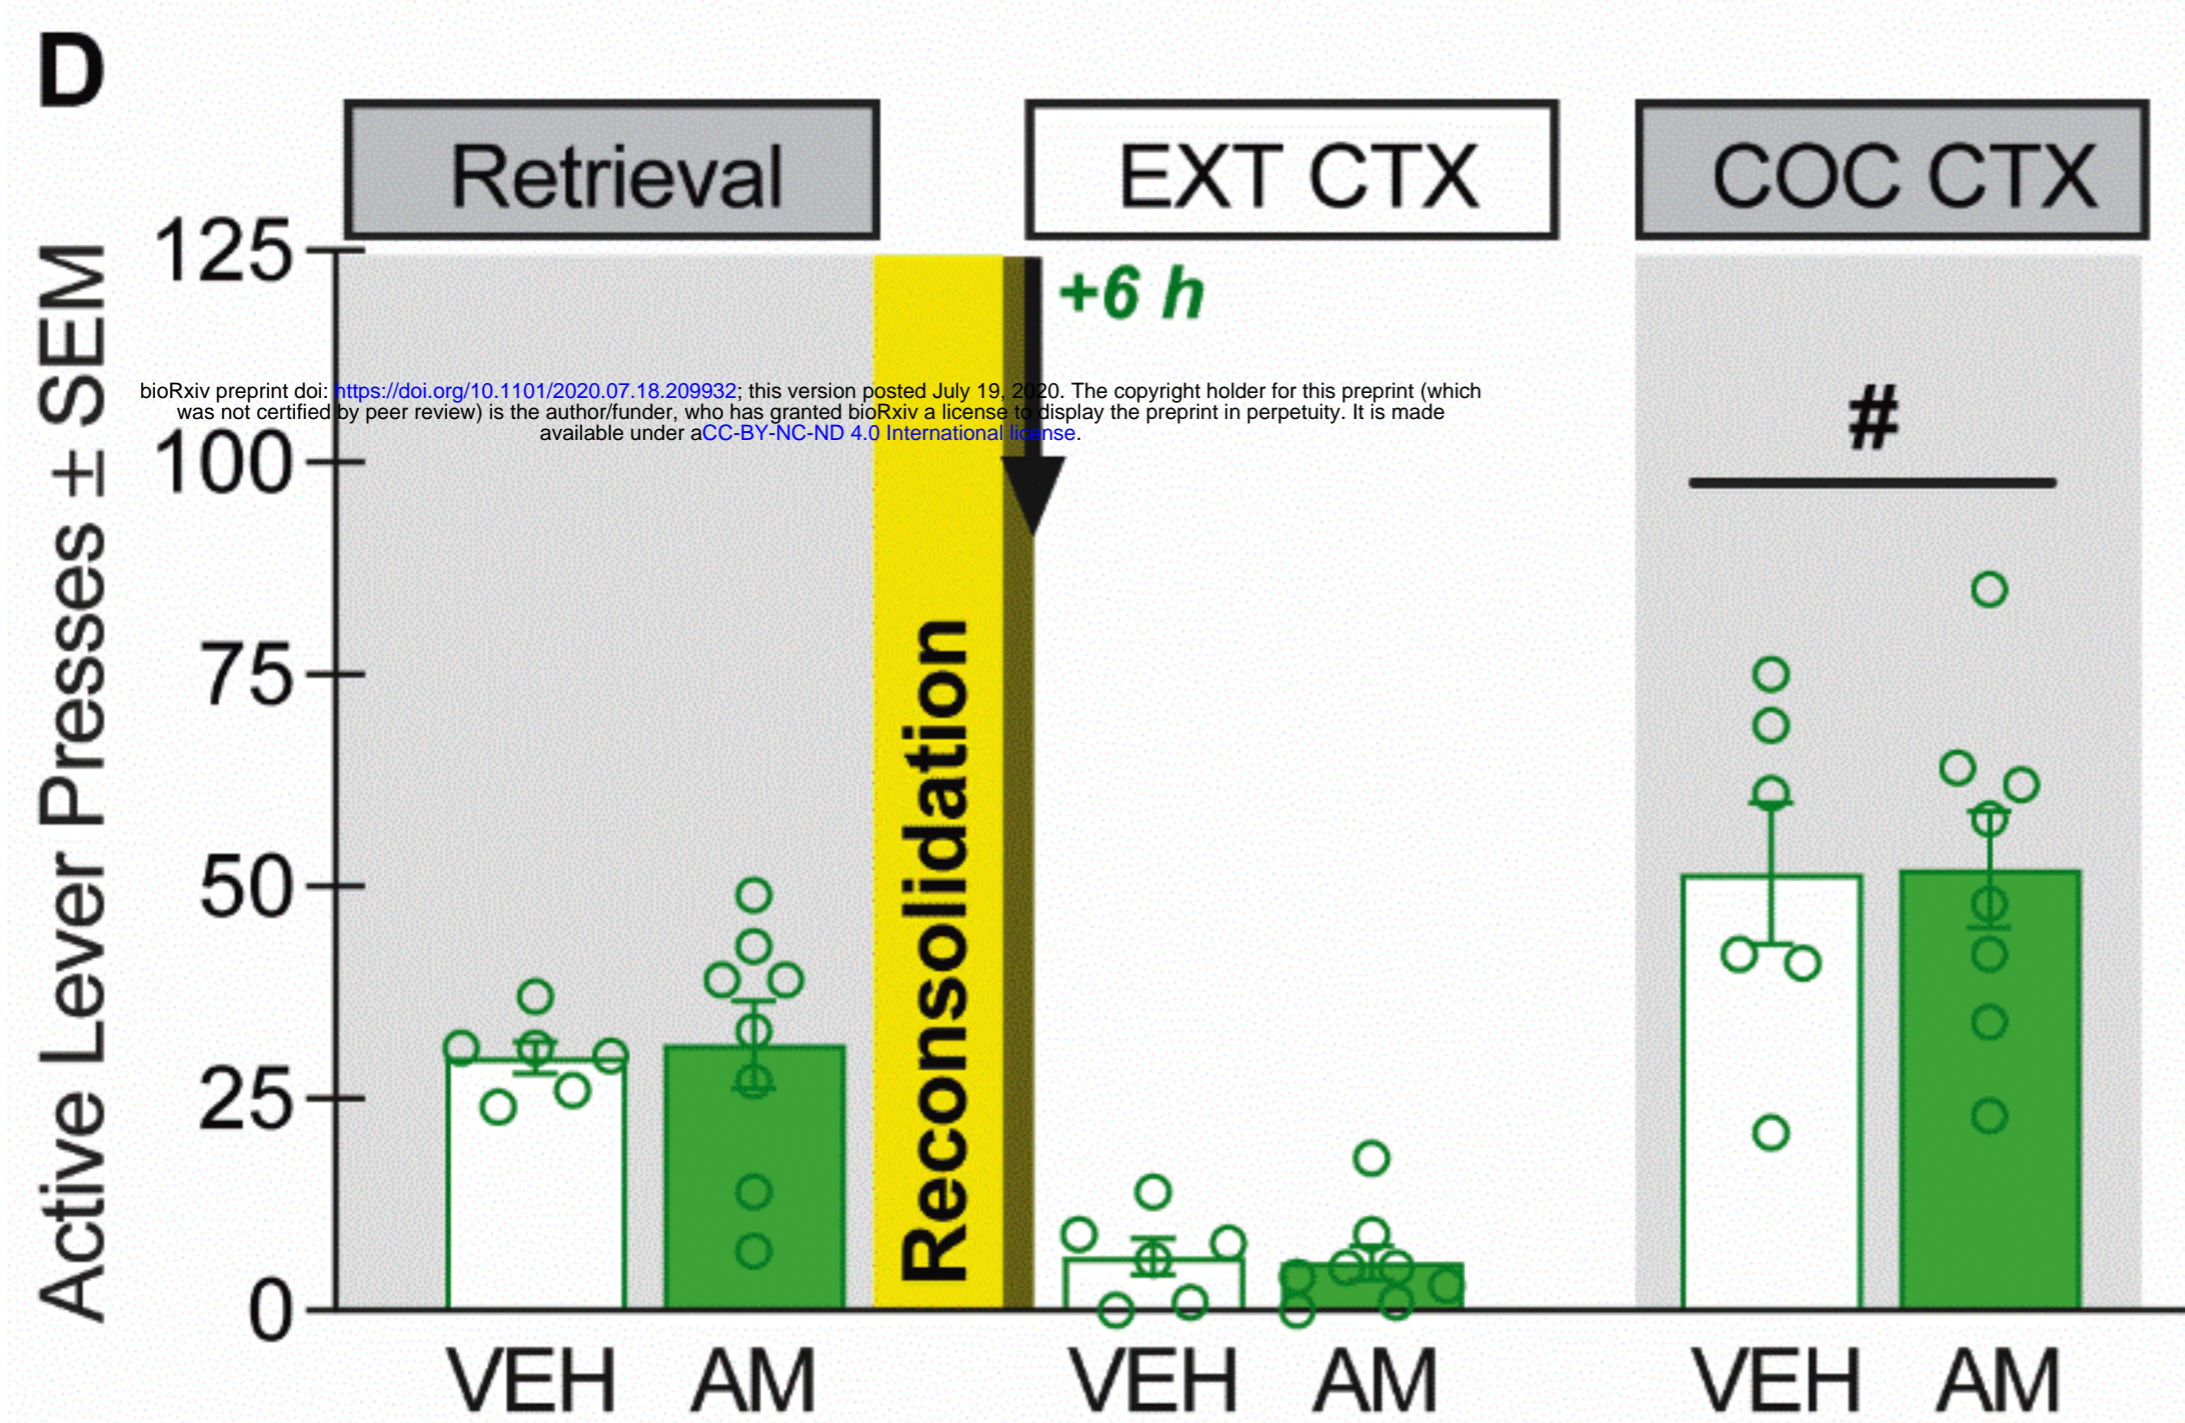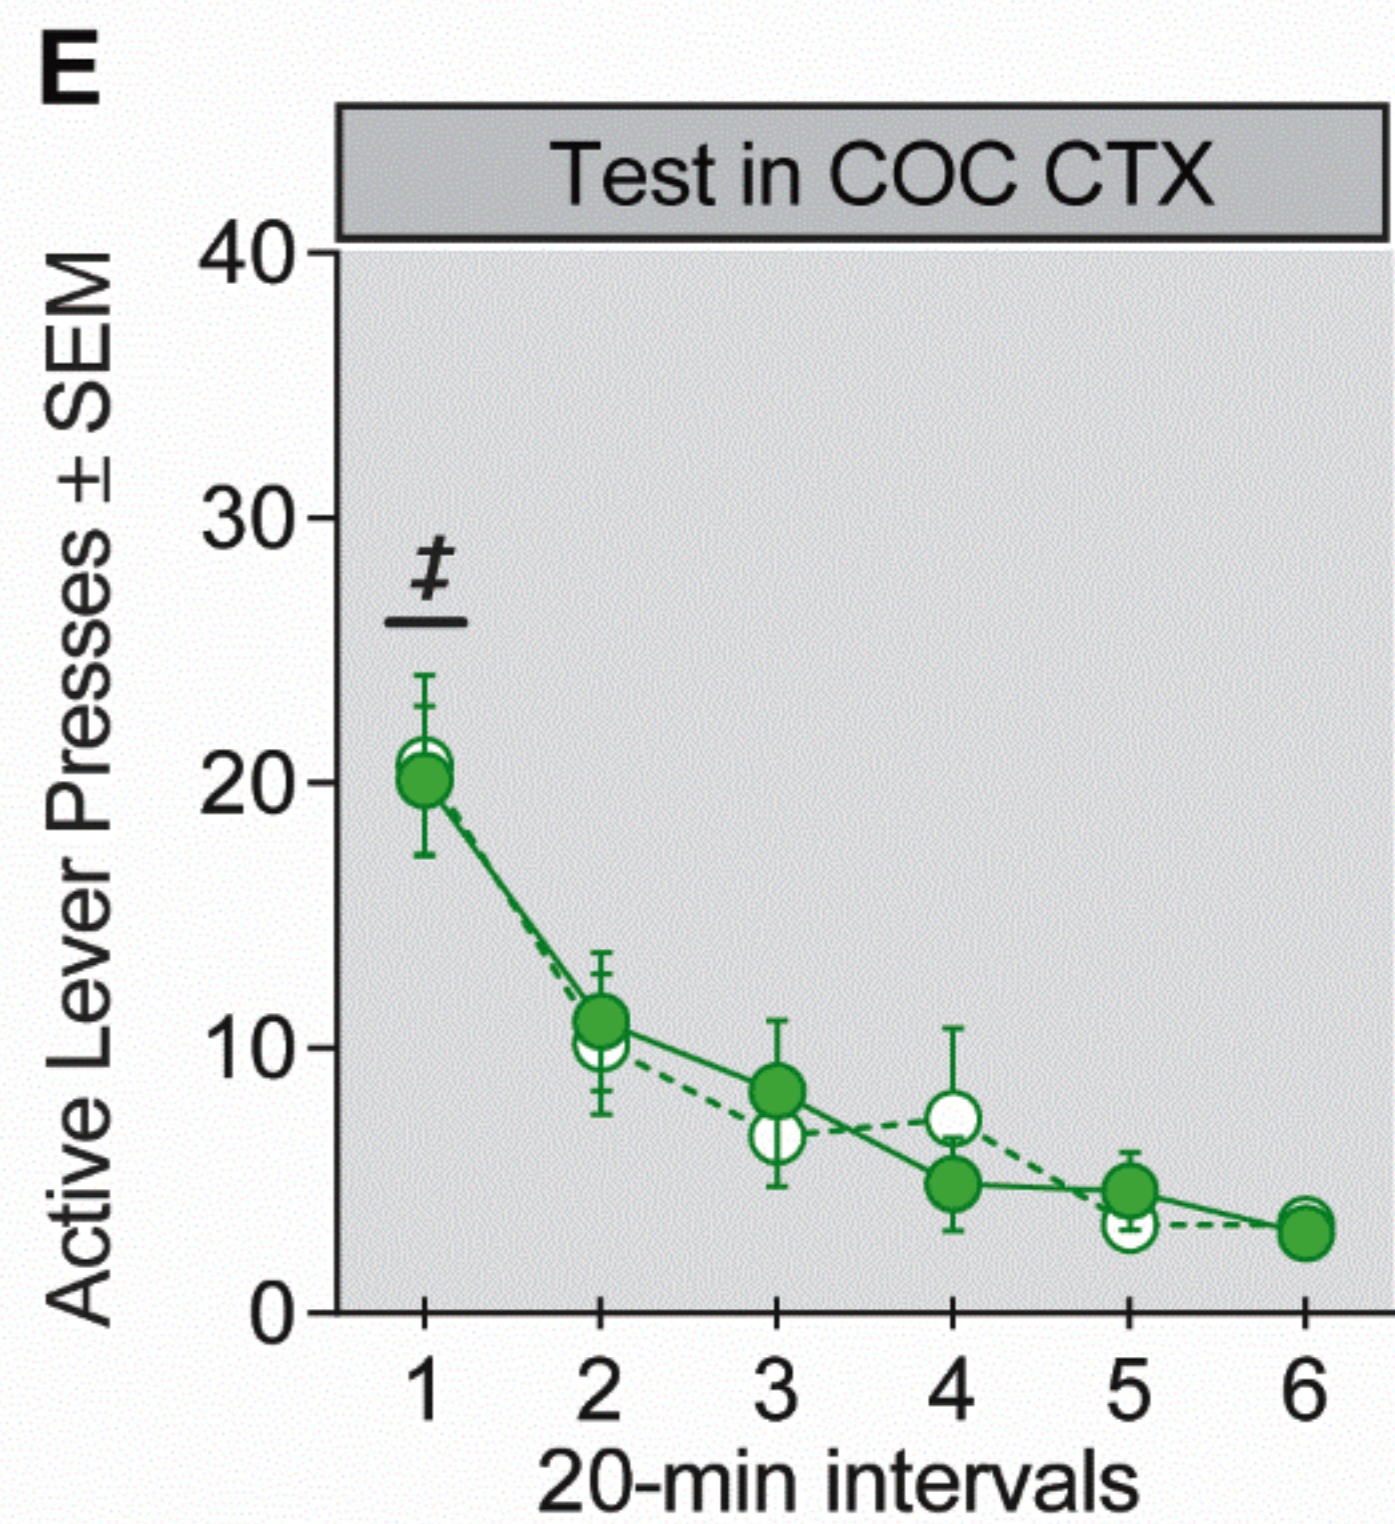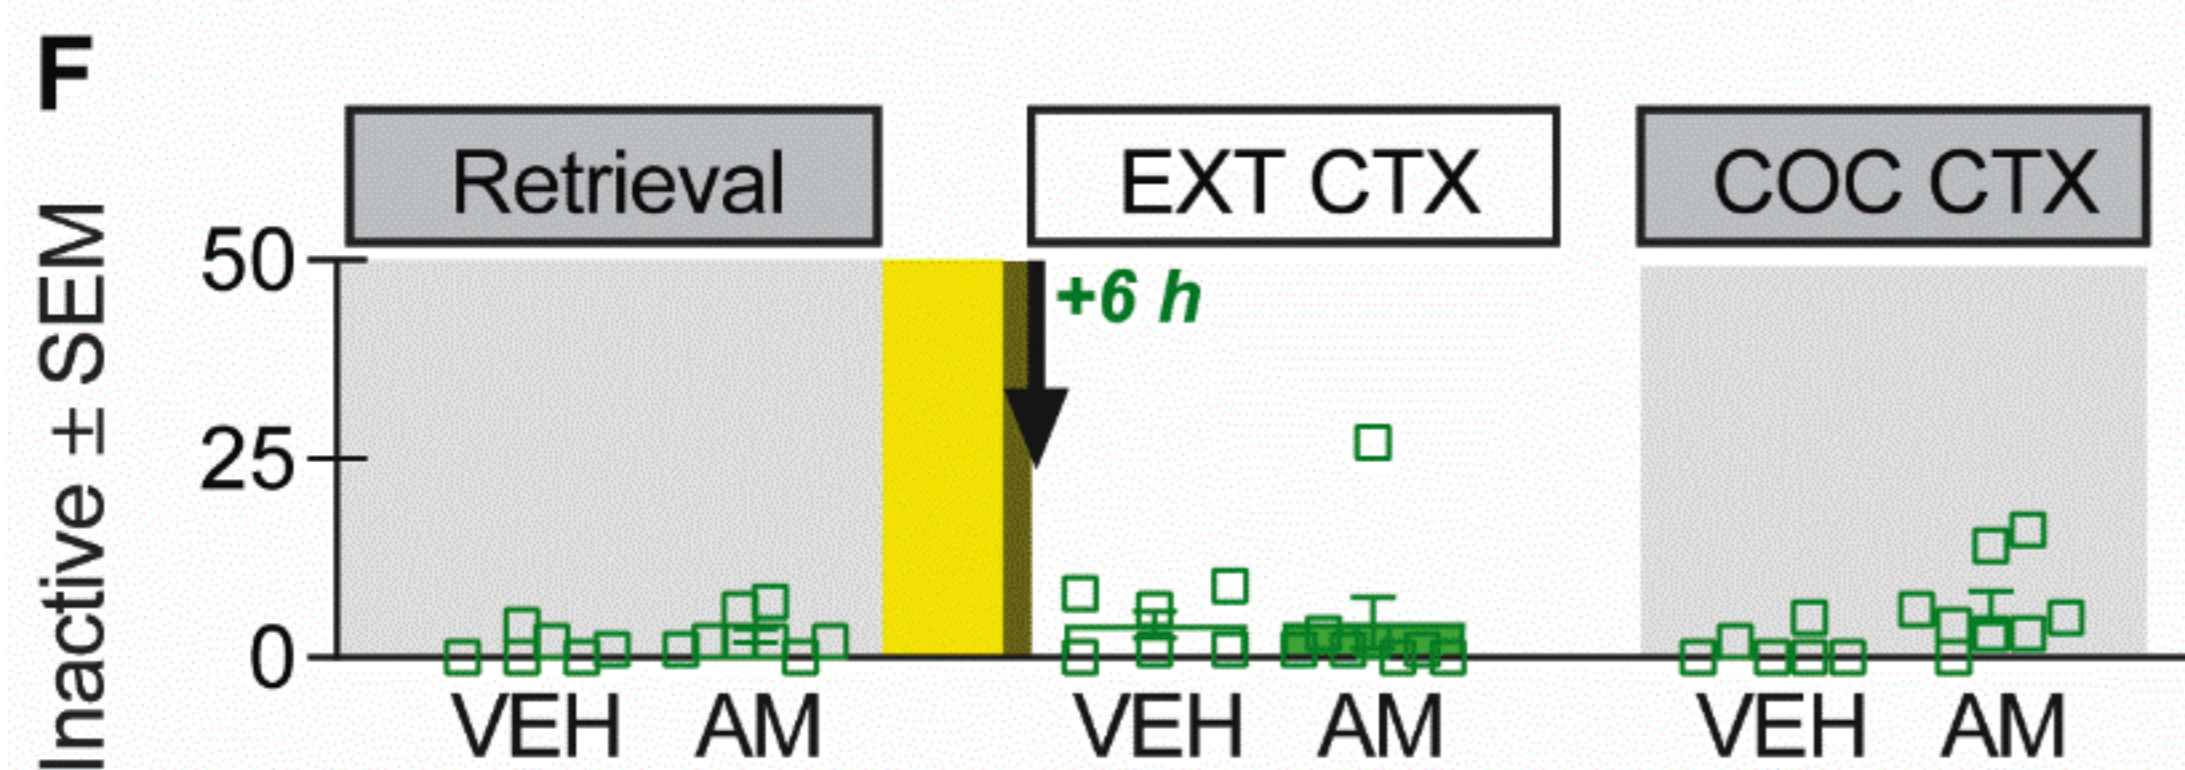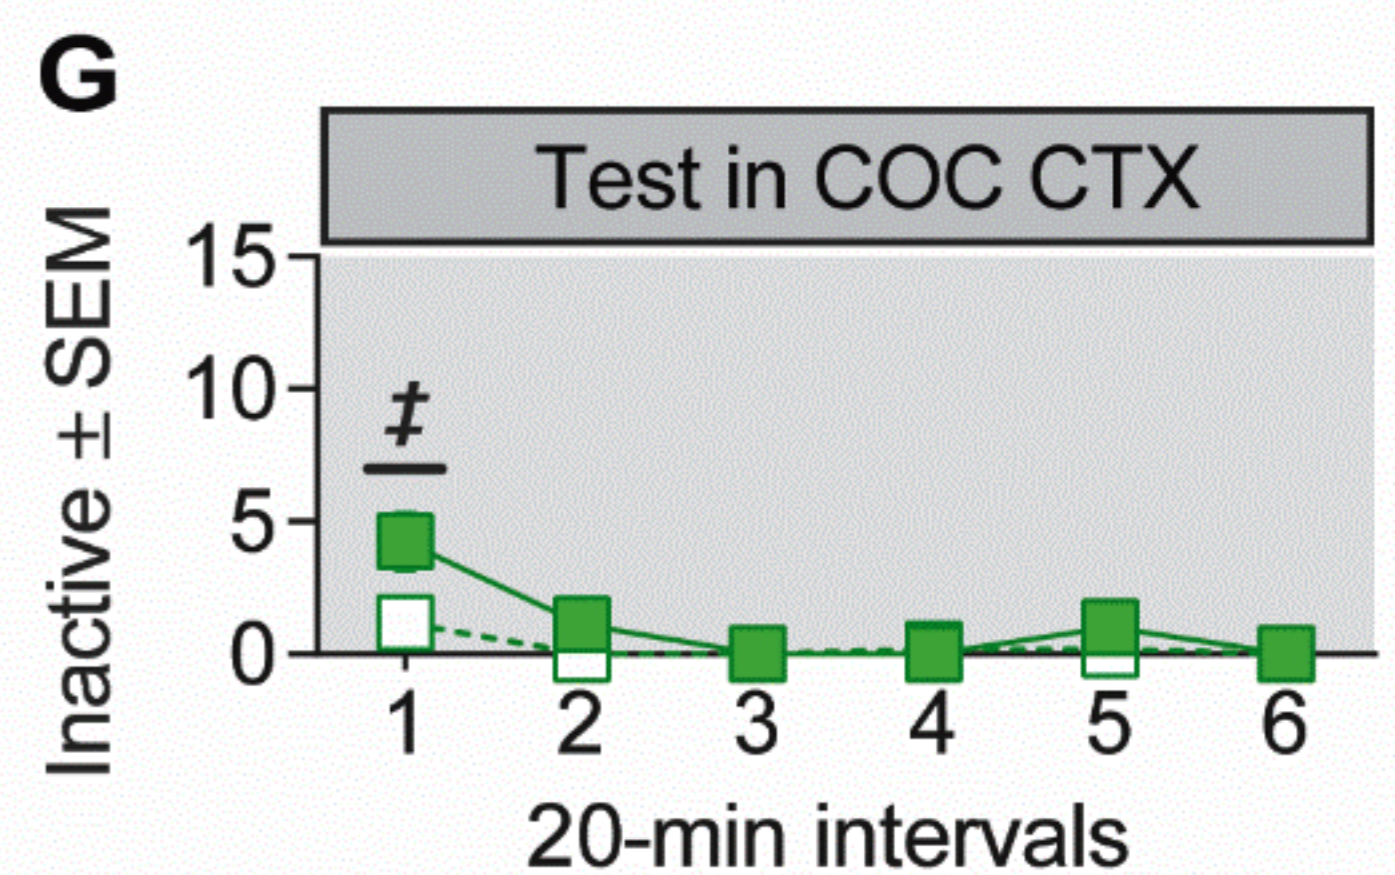

bioRxiv preprint doi: <https://doi.org/10.1101/2020.07.18.209932>; this version posted July 19, 2020. The copyright holder for this preprint (which was not certified by peer review) is the author/funder, who has granted bioRxiv a license to display the preprint in perpetuity. It is made available under aCC-BY-NC-ND 4.0 International license.



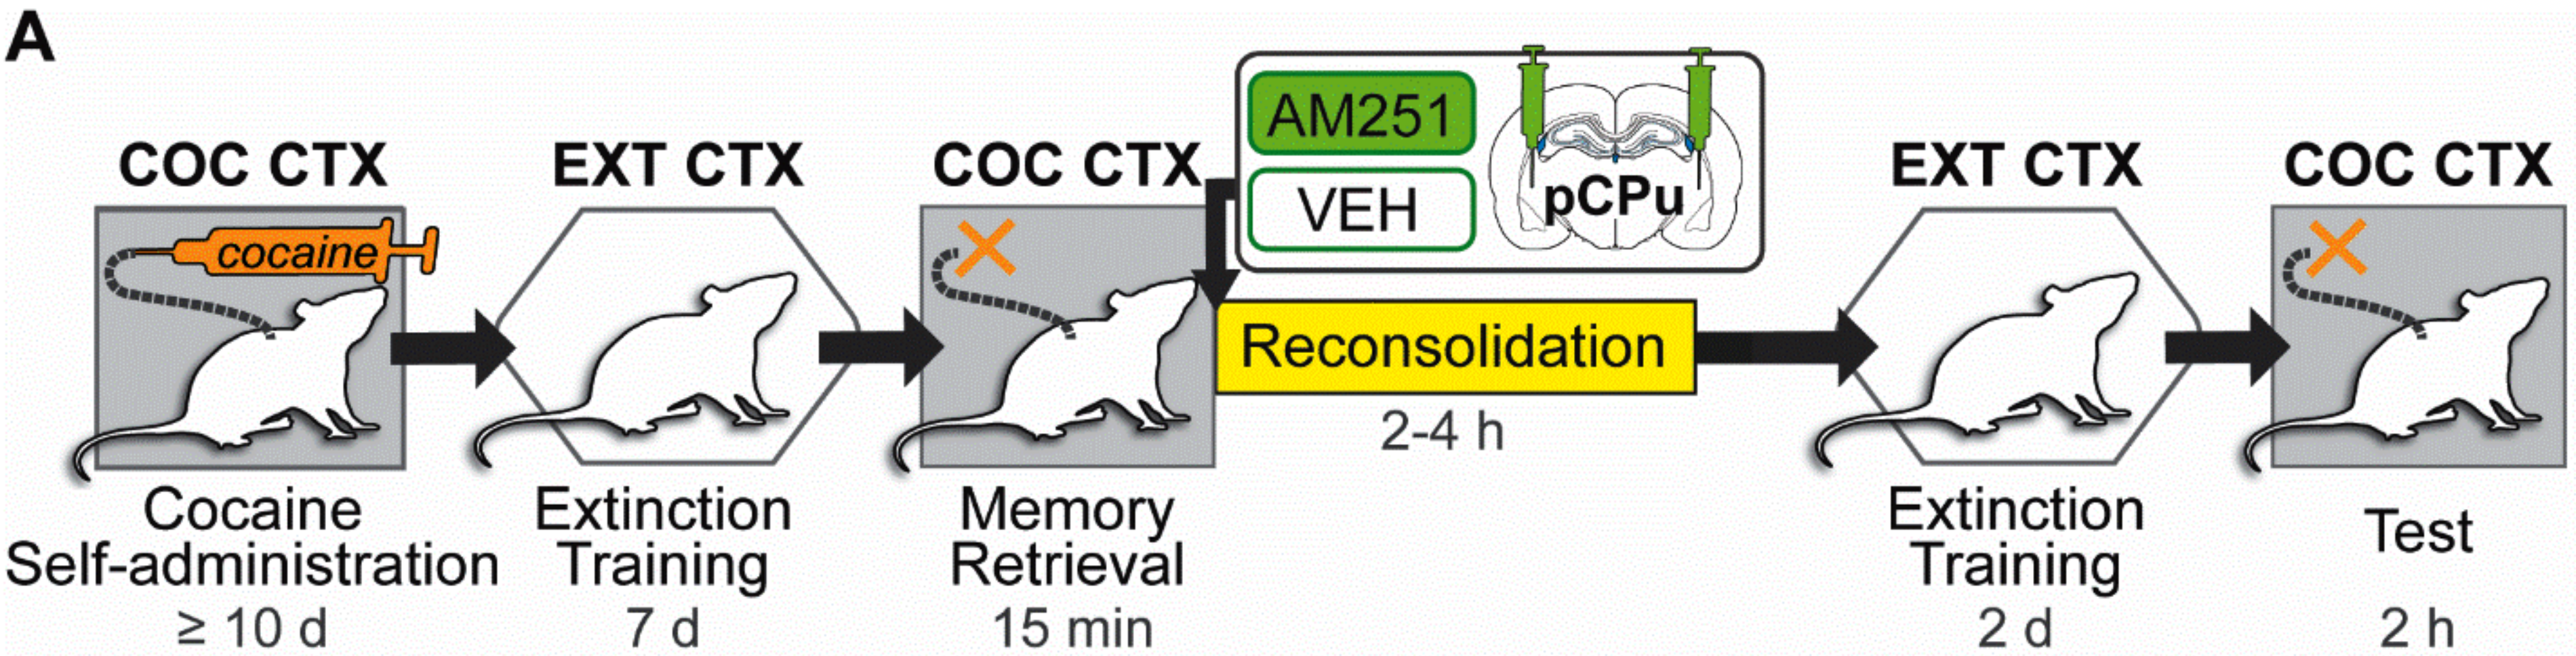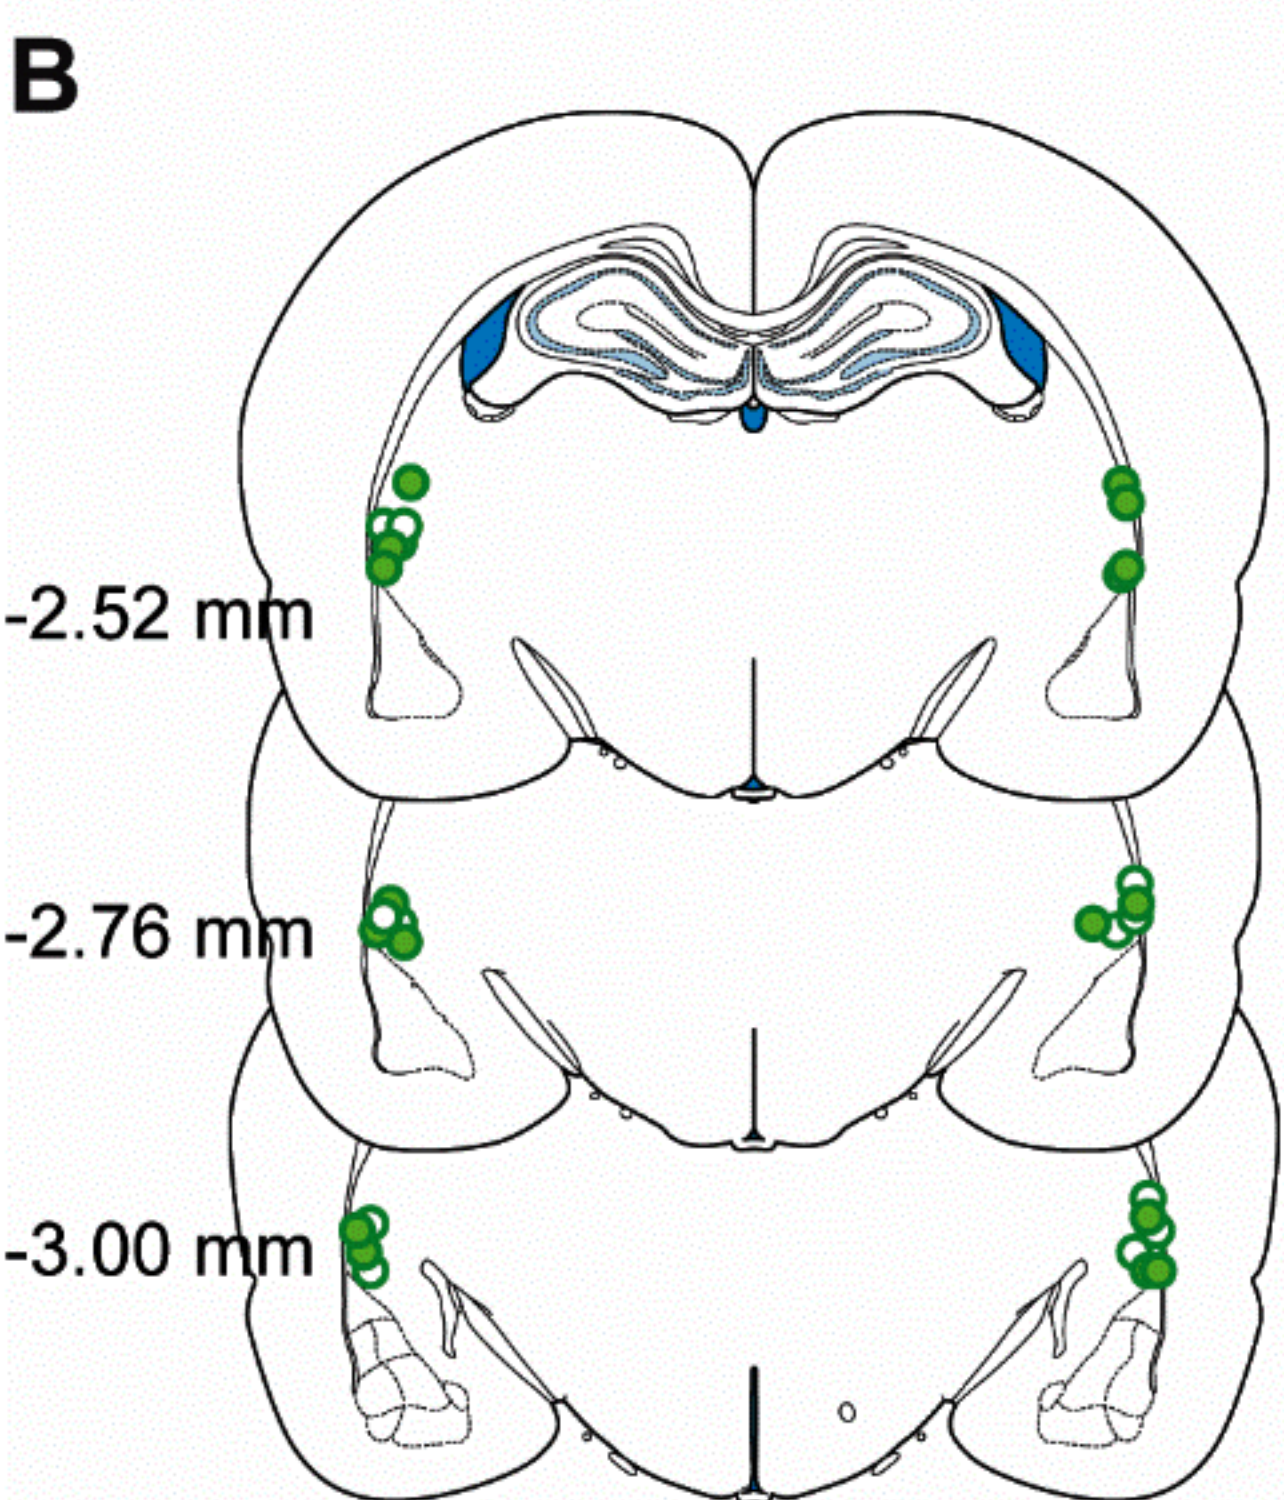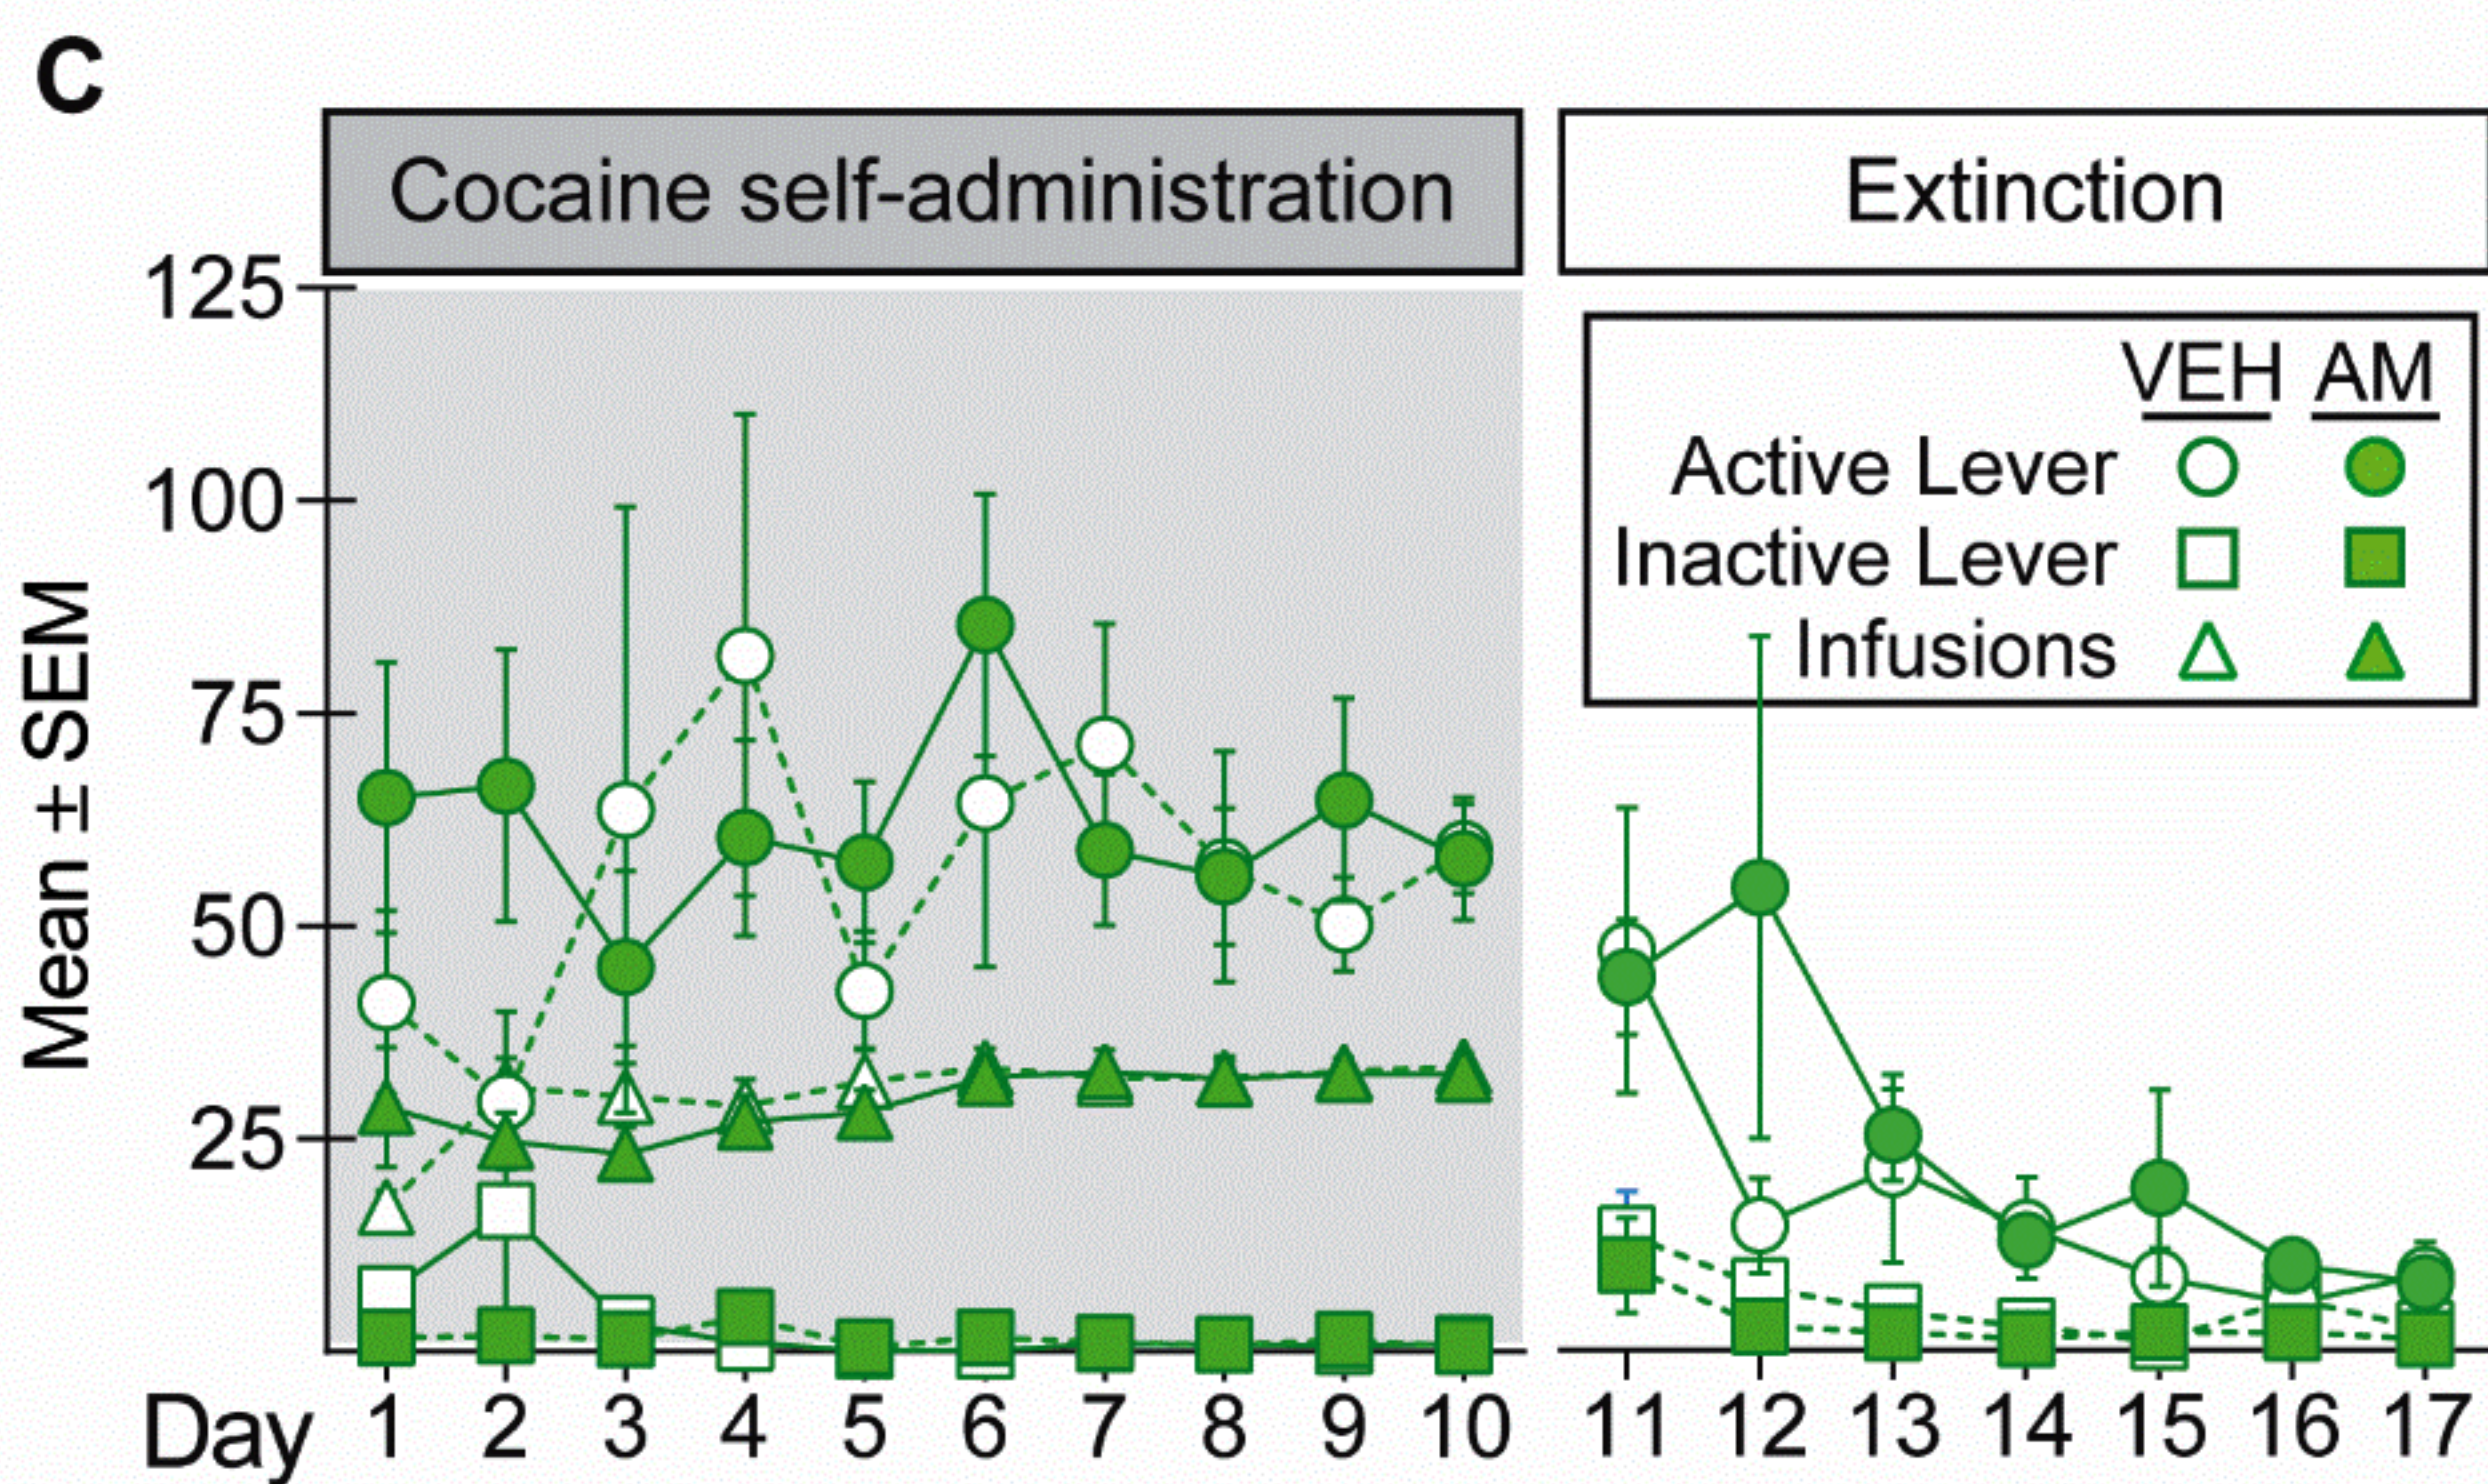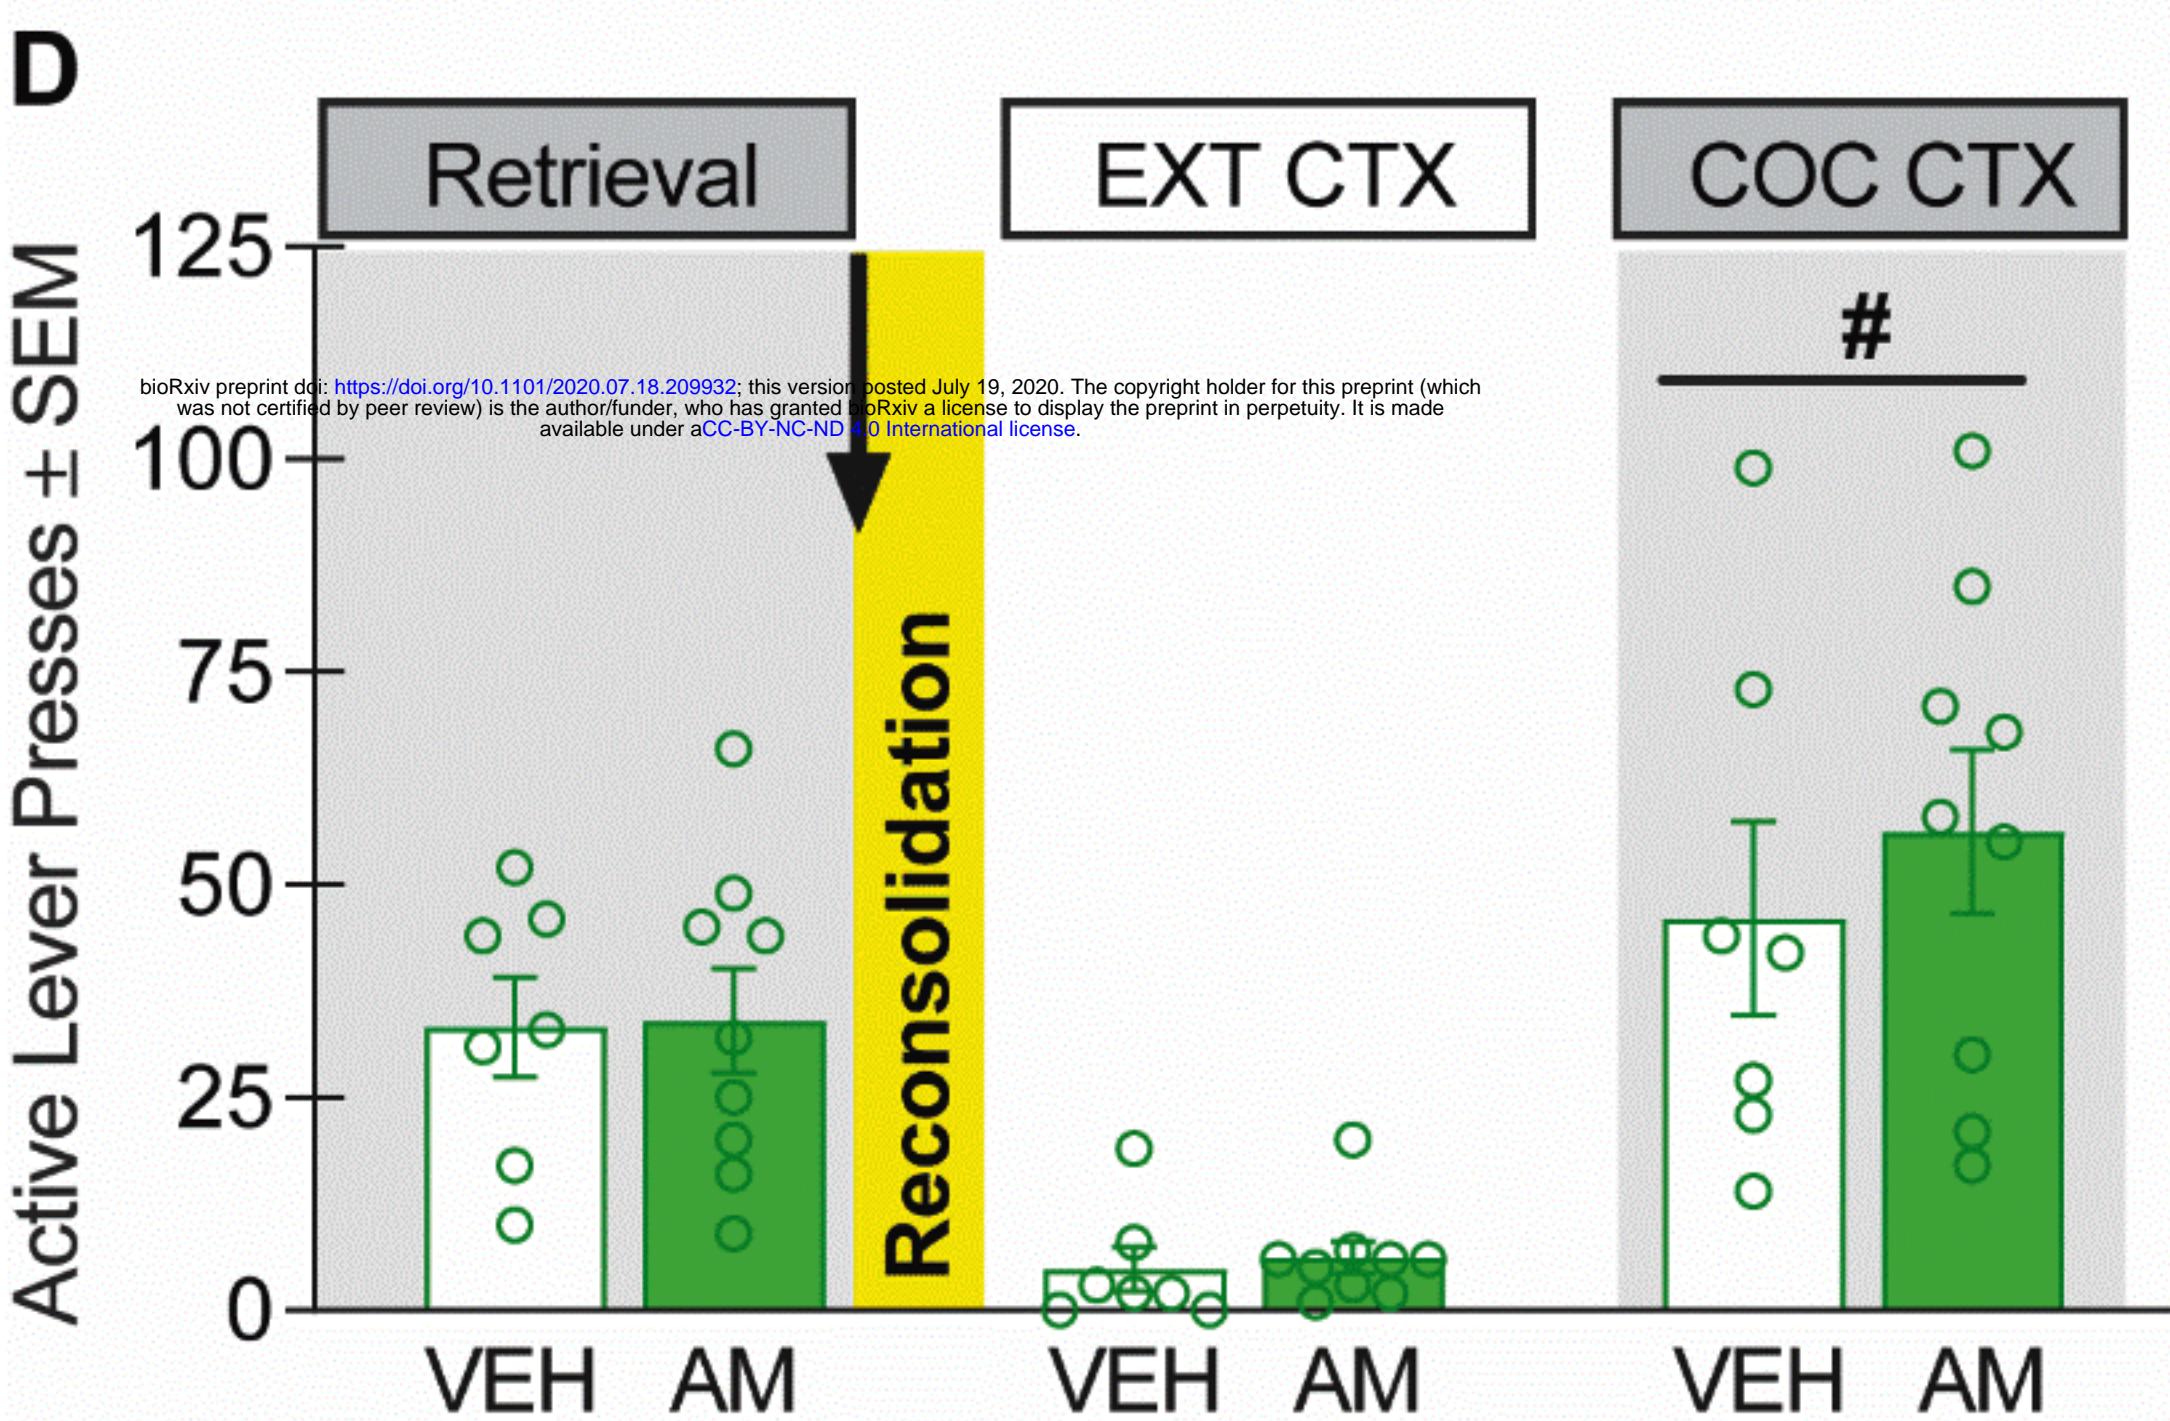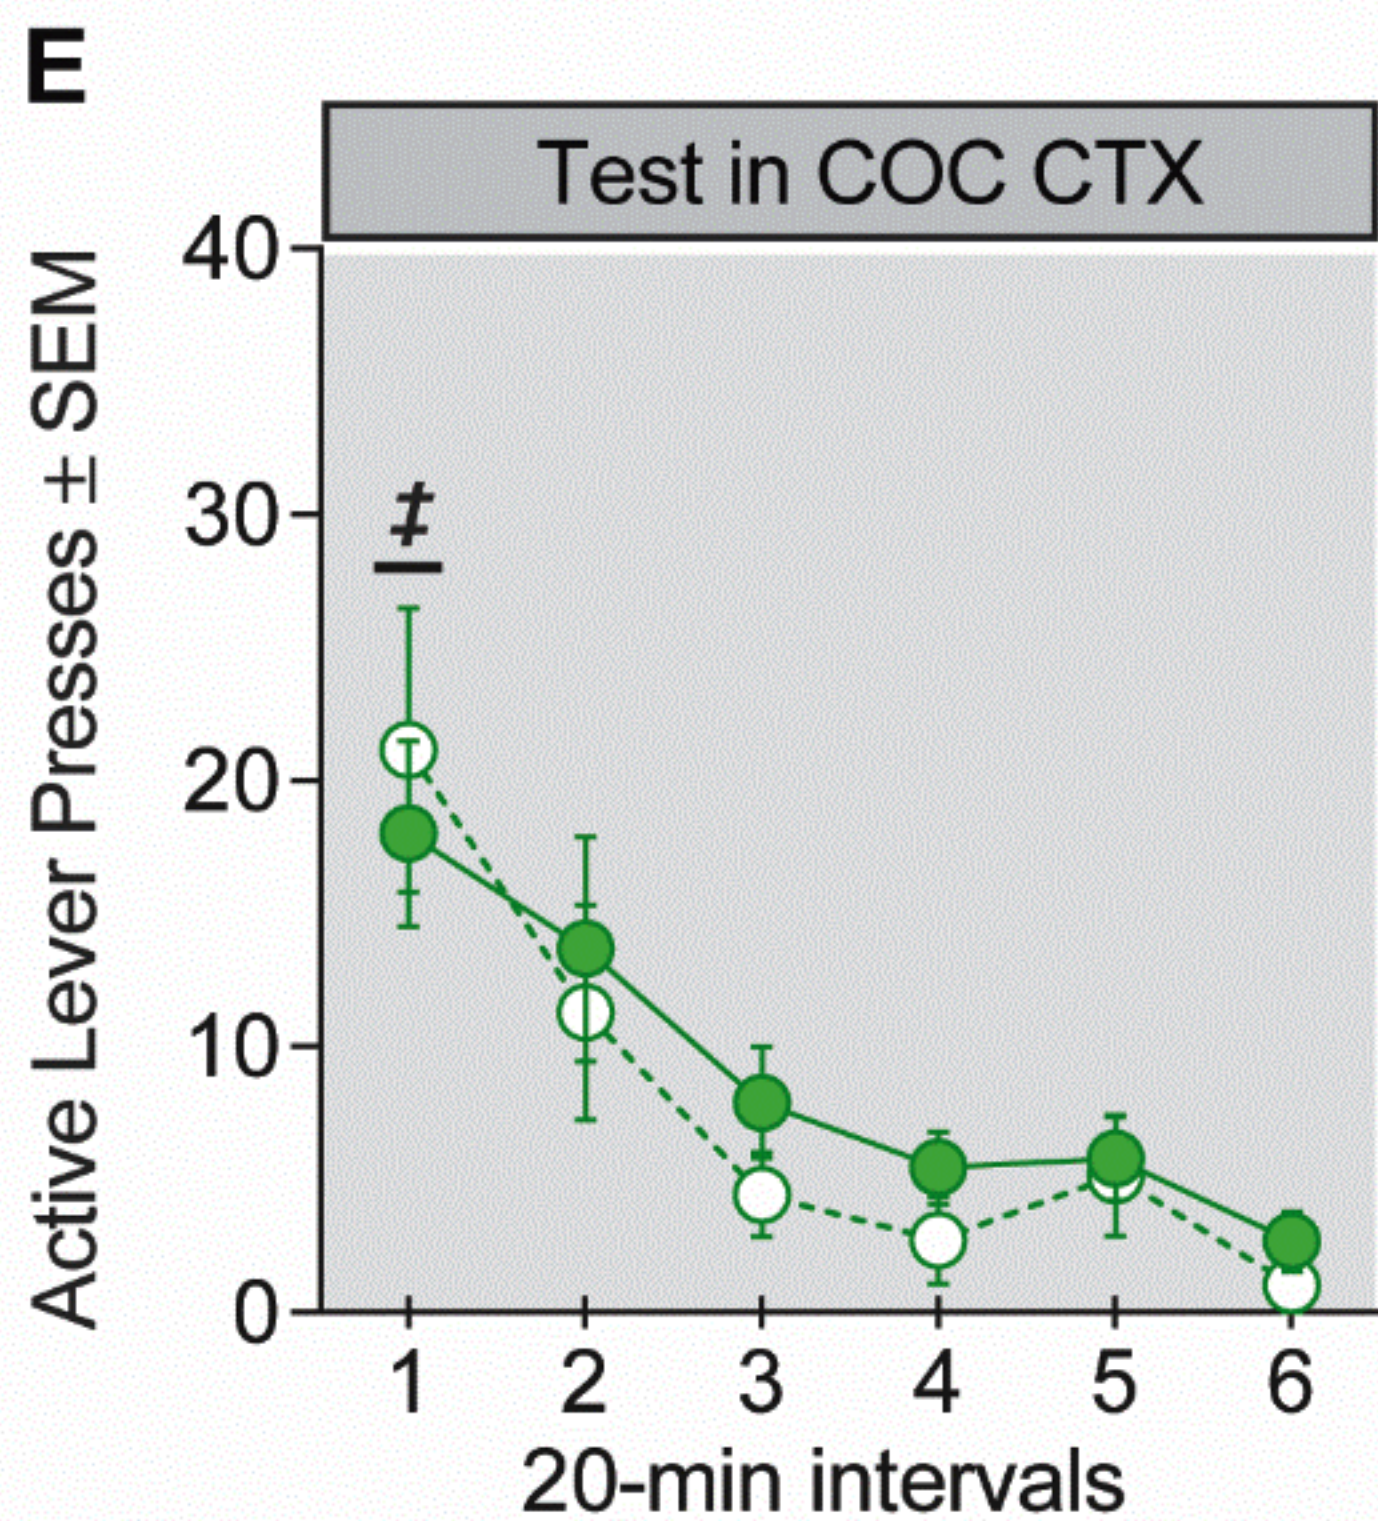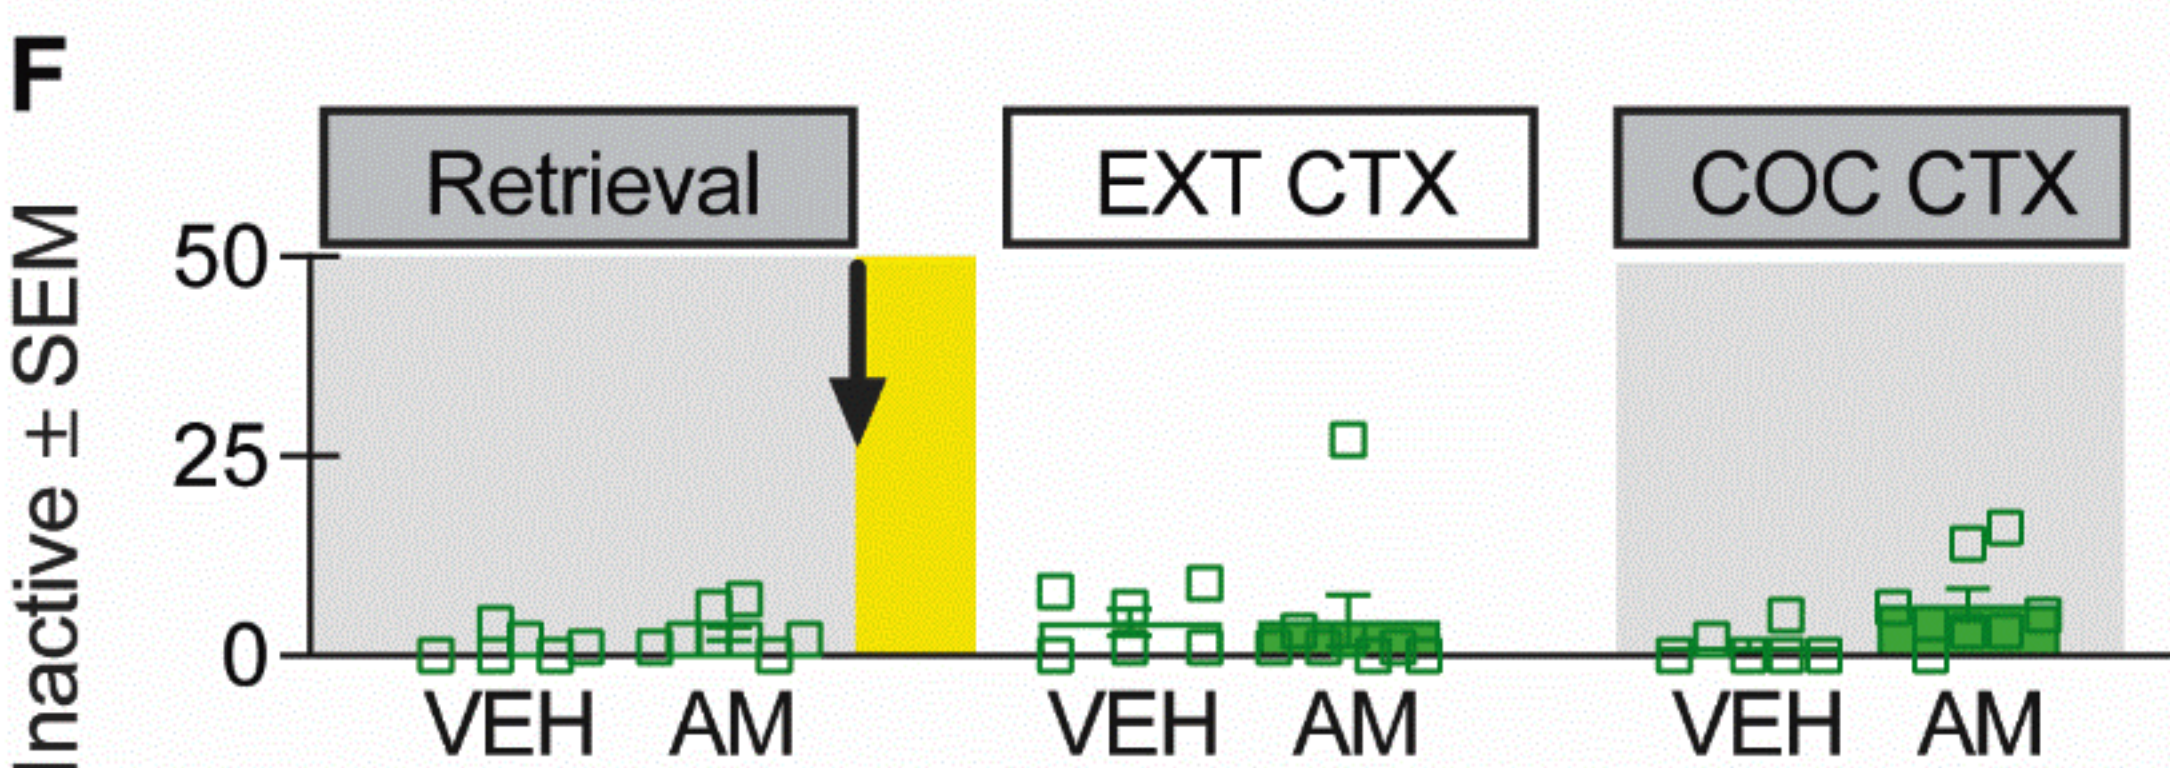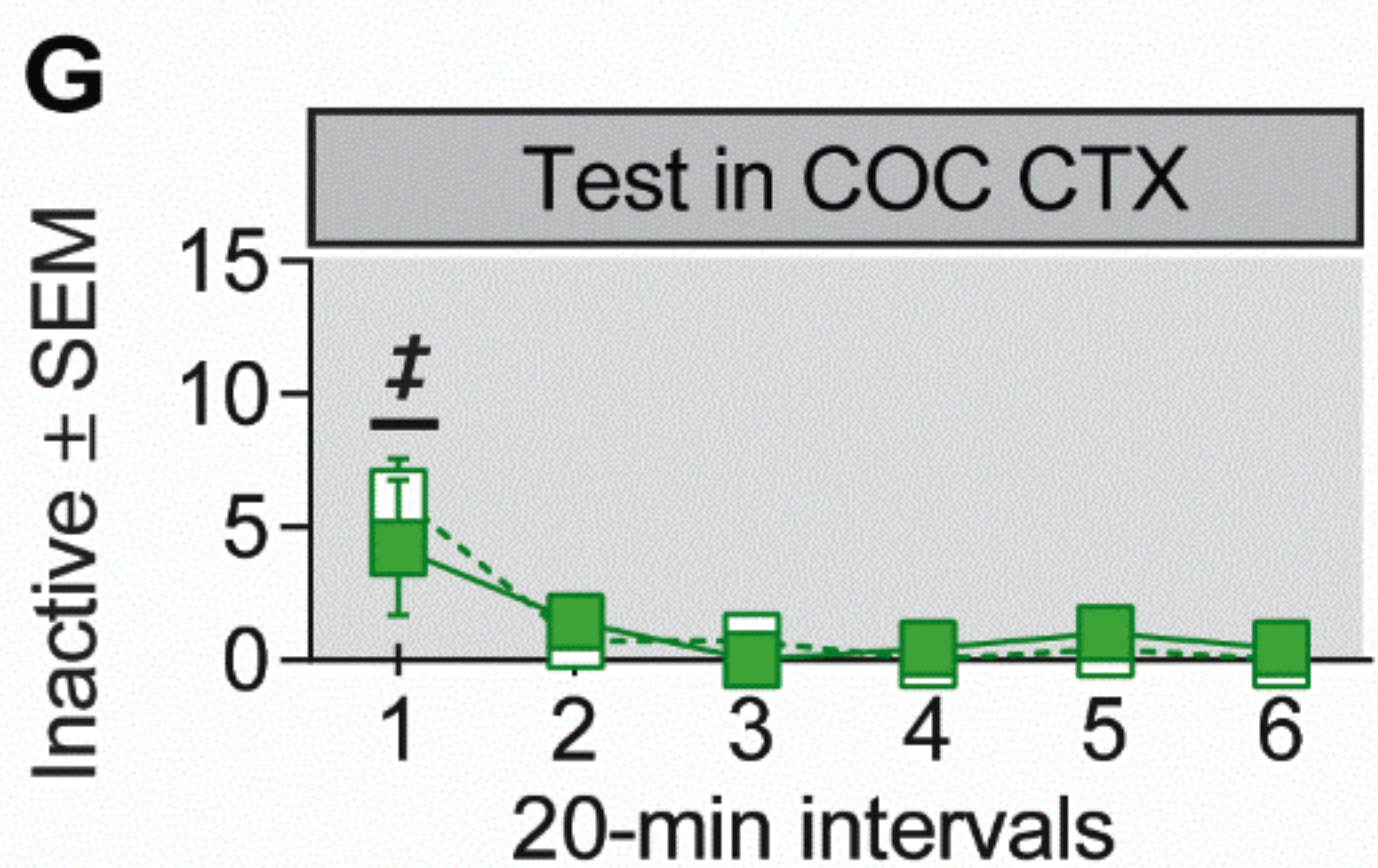

bioRxiv preprint doi: <https://doi.org/10.1101/2020.07.18.209932>; this version posted July 19, 2020. The copyright holder for this preprint (which was not certified by peer review) is the author/funder, who has granted bioRxiv a license to display the preprint in perpetuity. It is made available under aCC-BY-NC-ND 4.0 International license.



**A**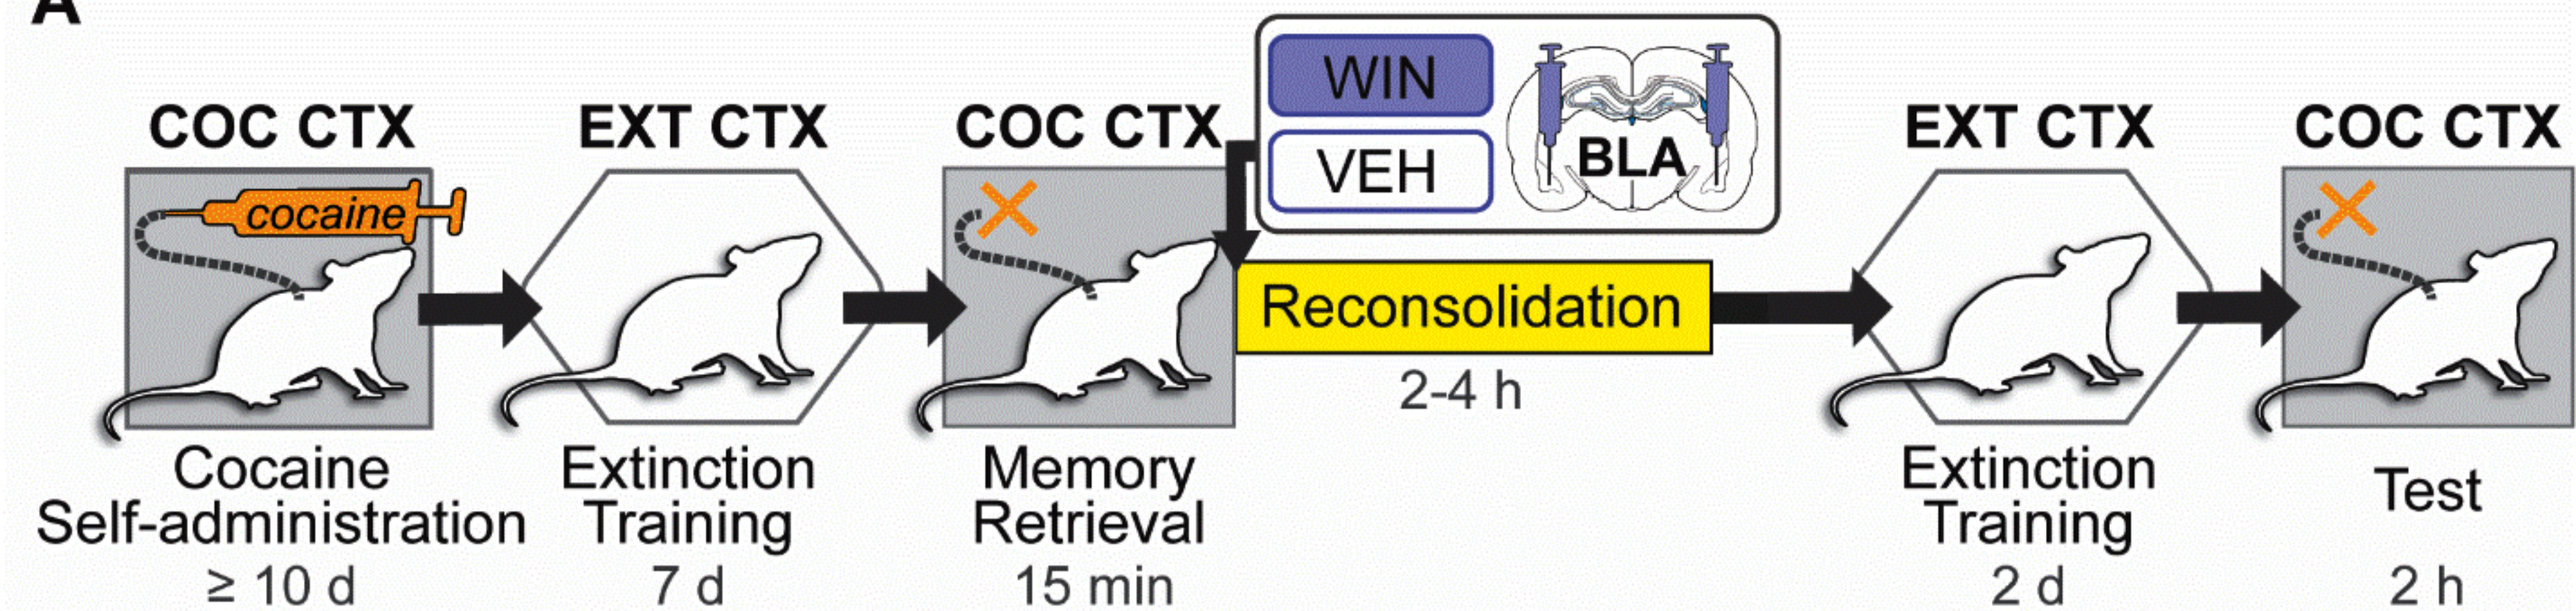**B**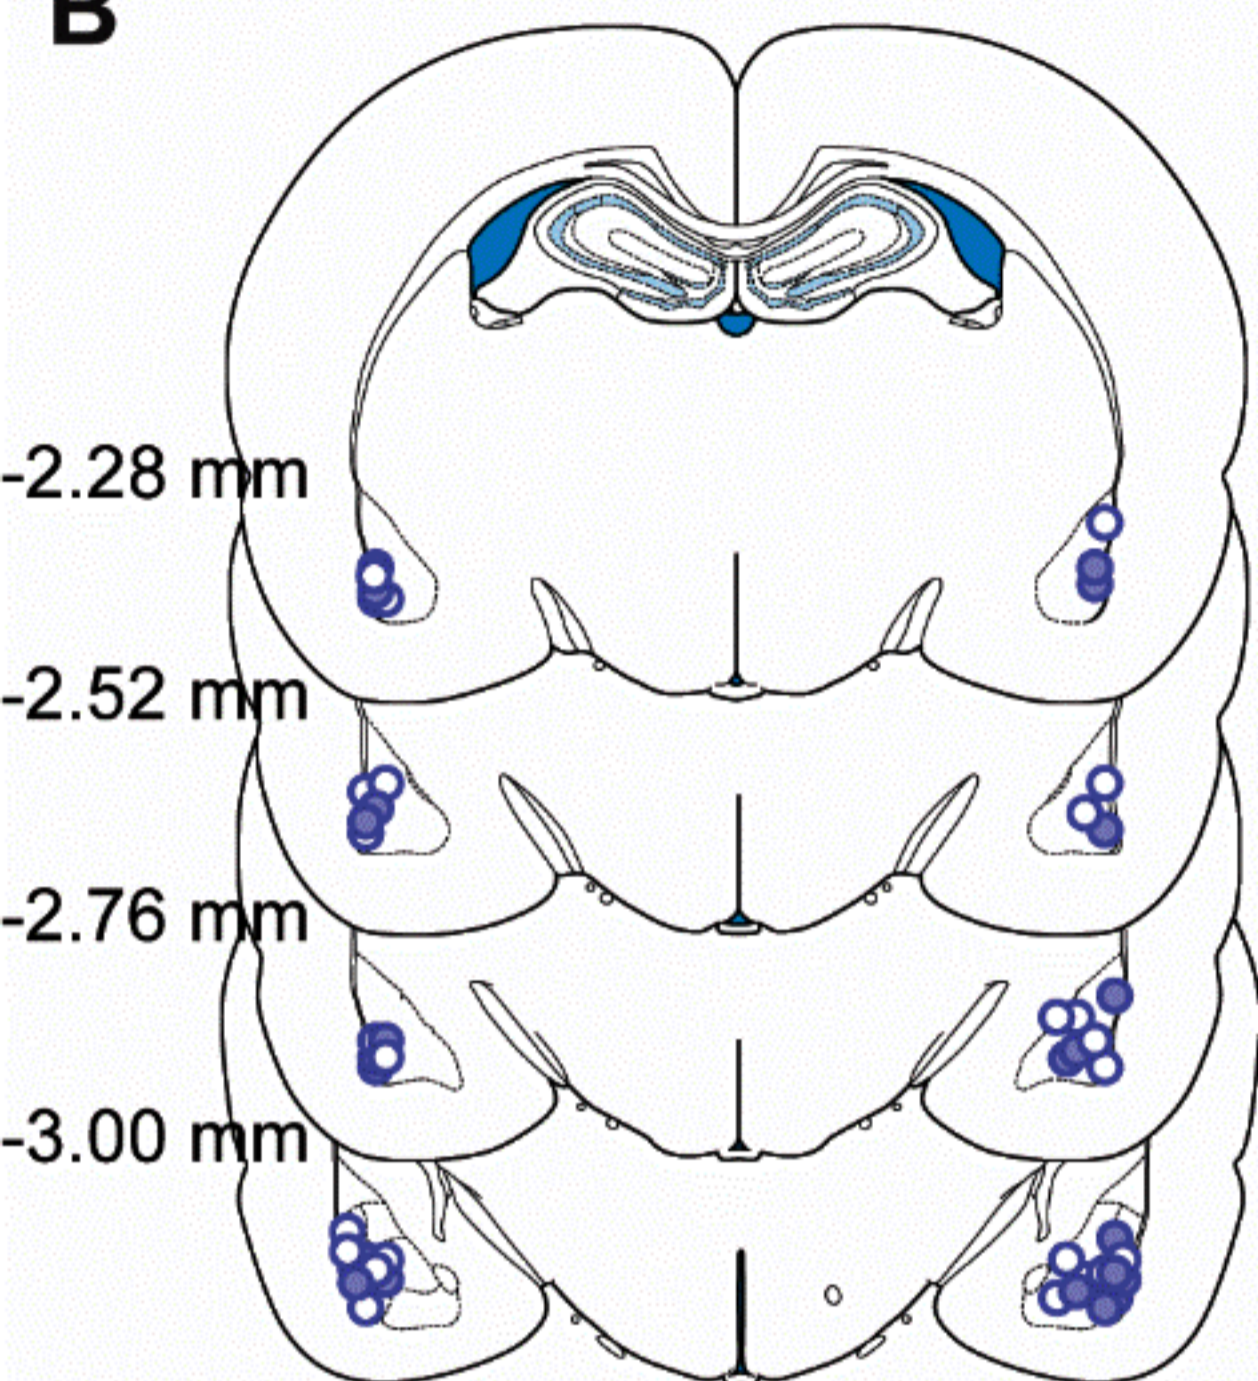**C**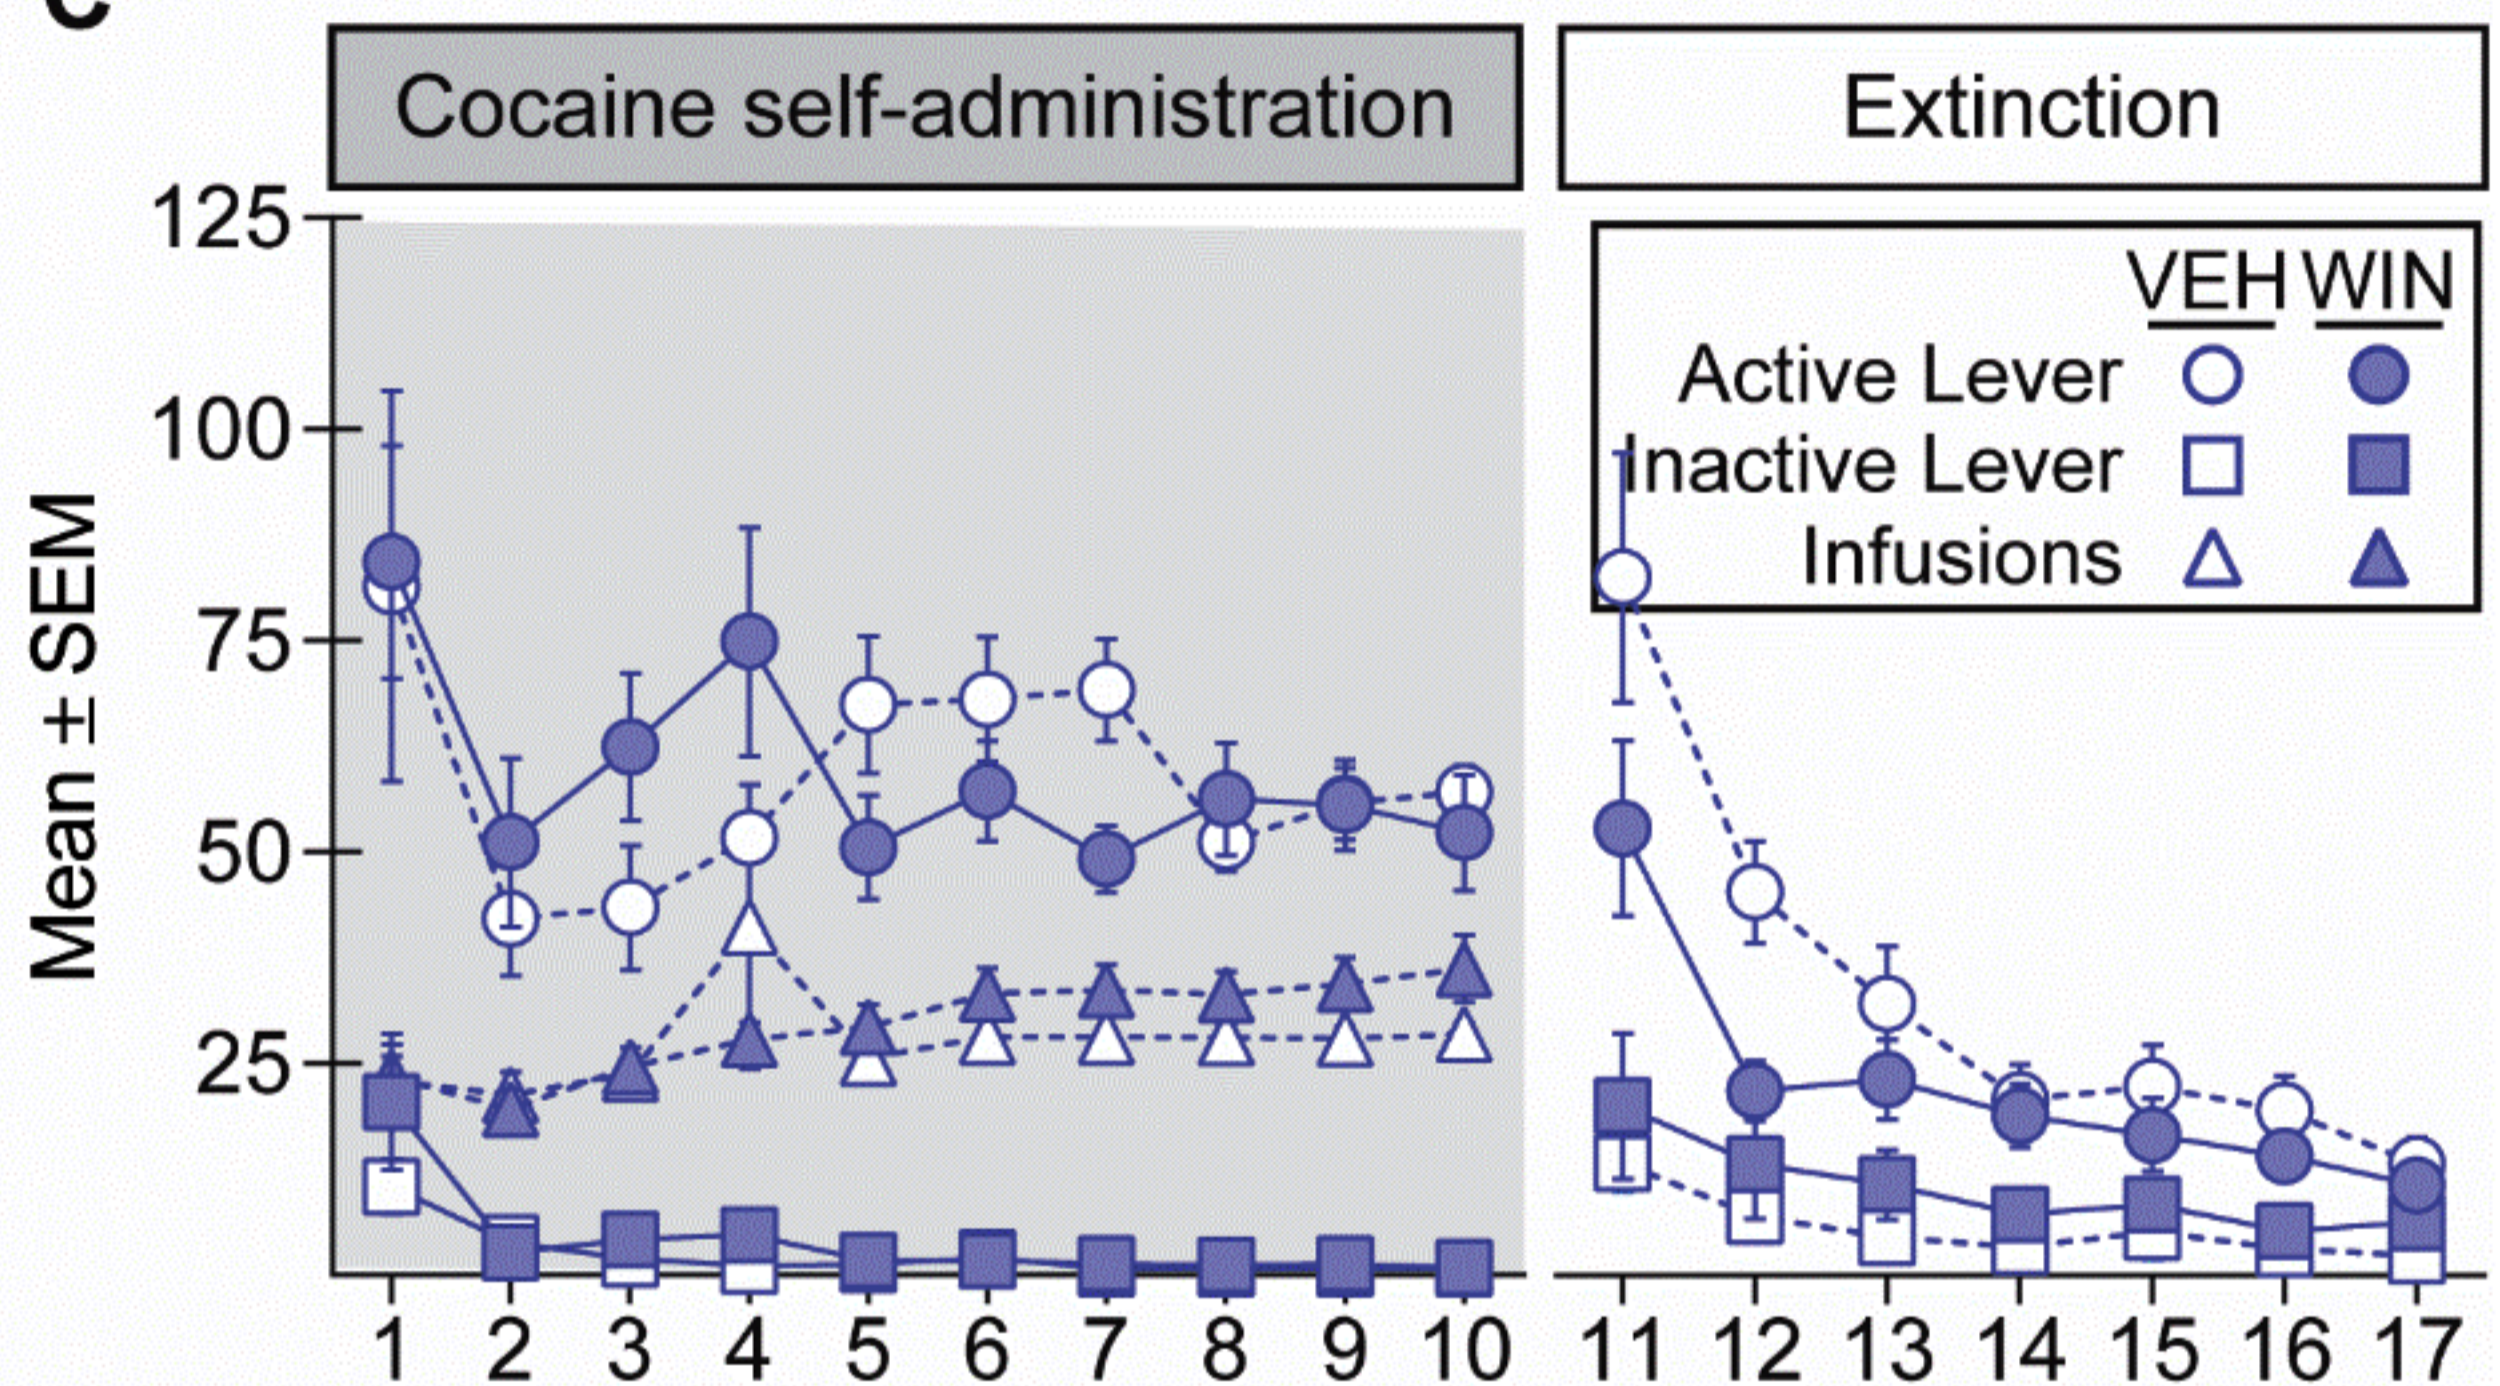**D**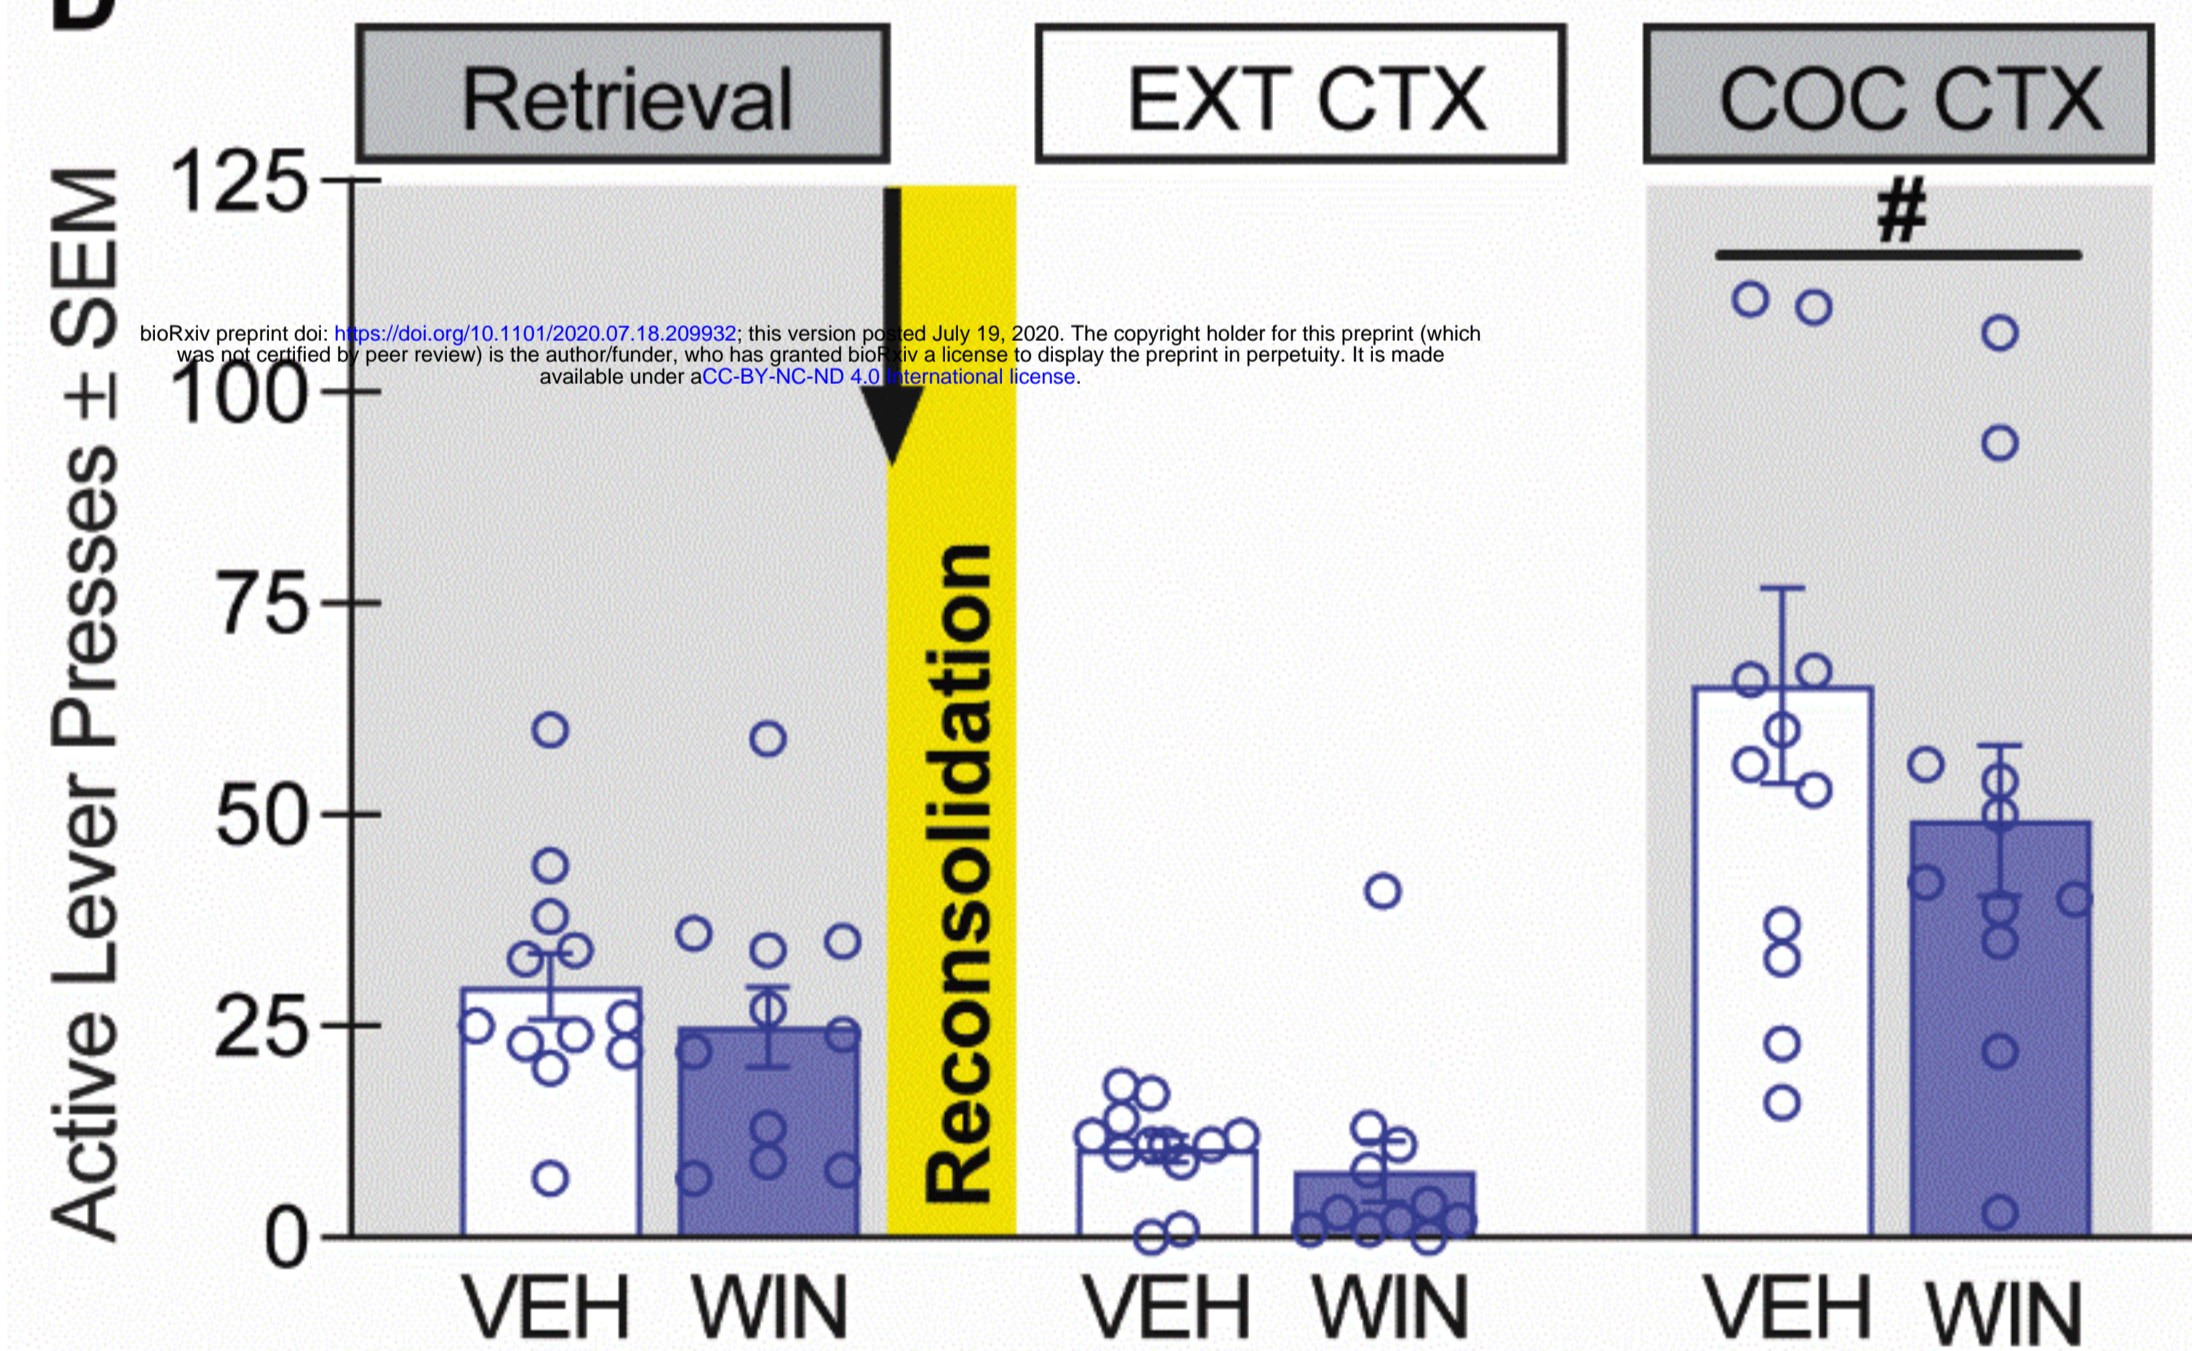**E**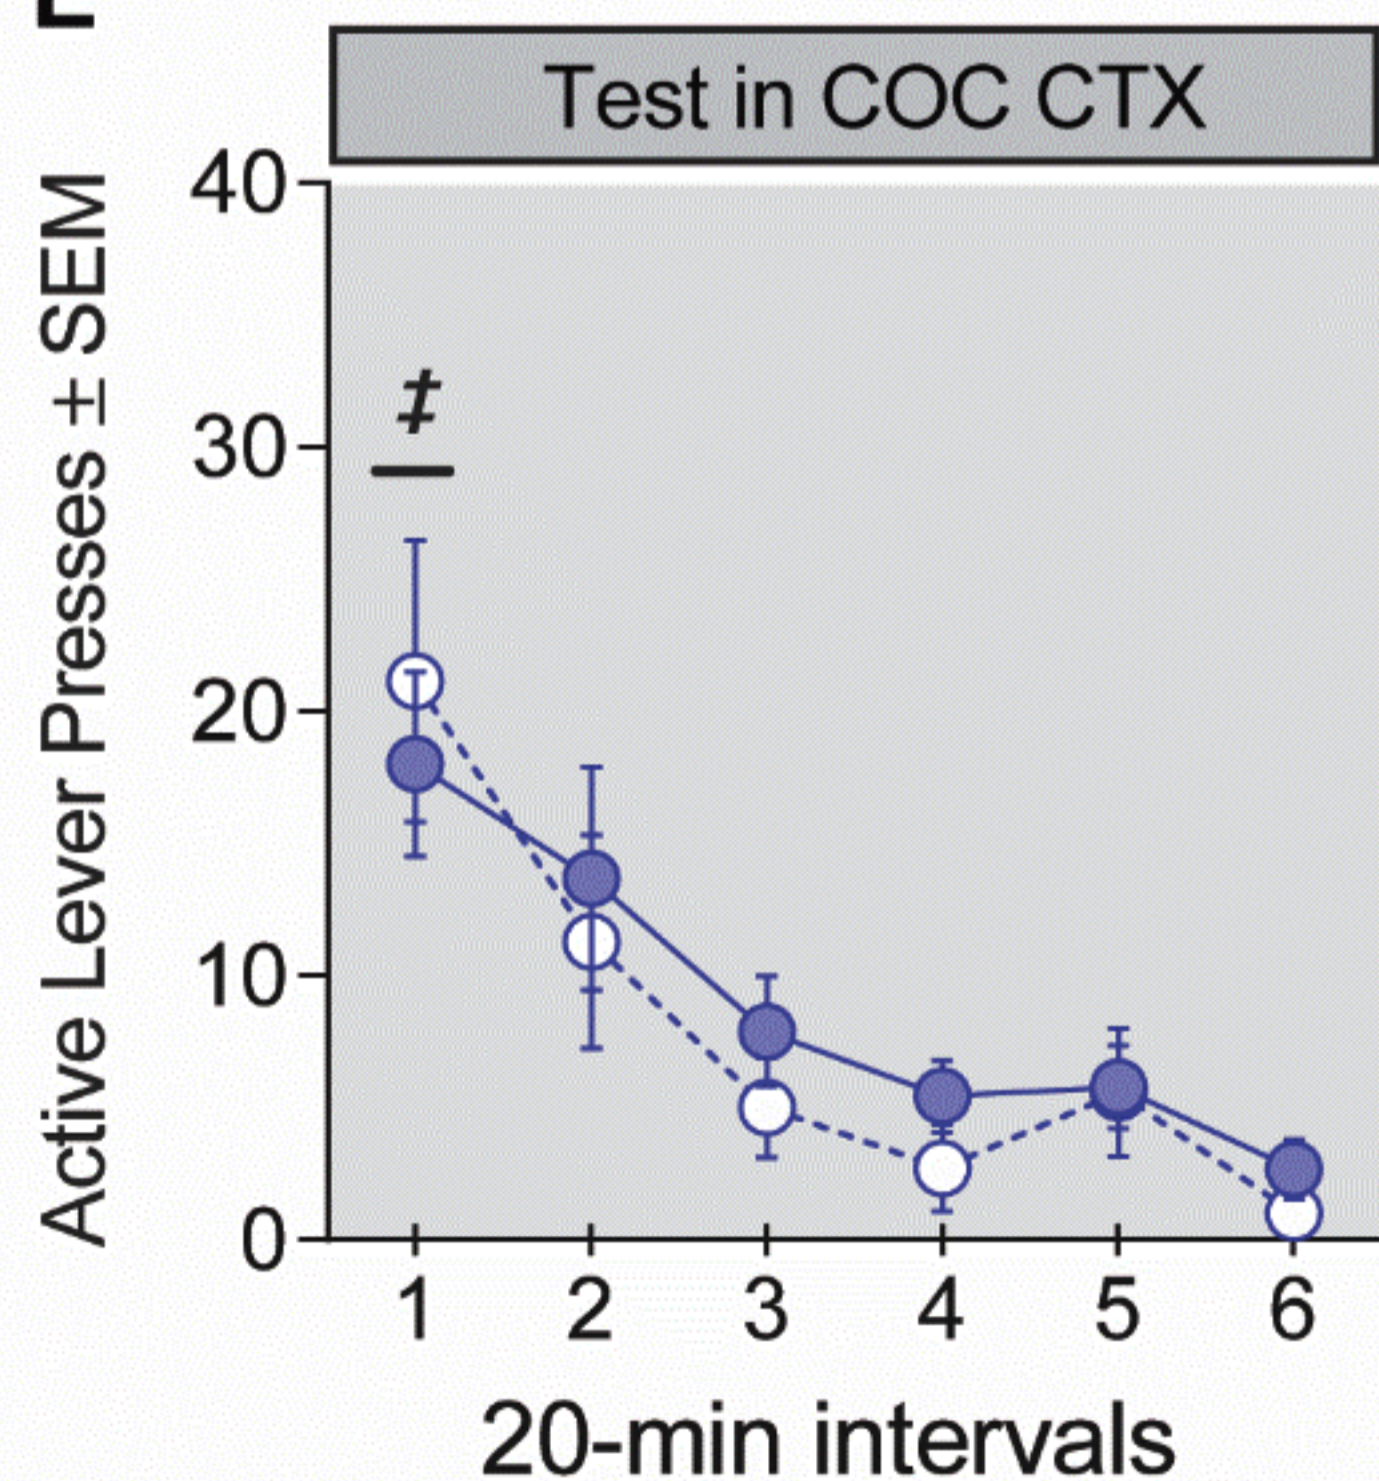**F**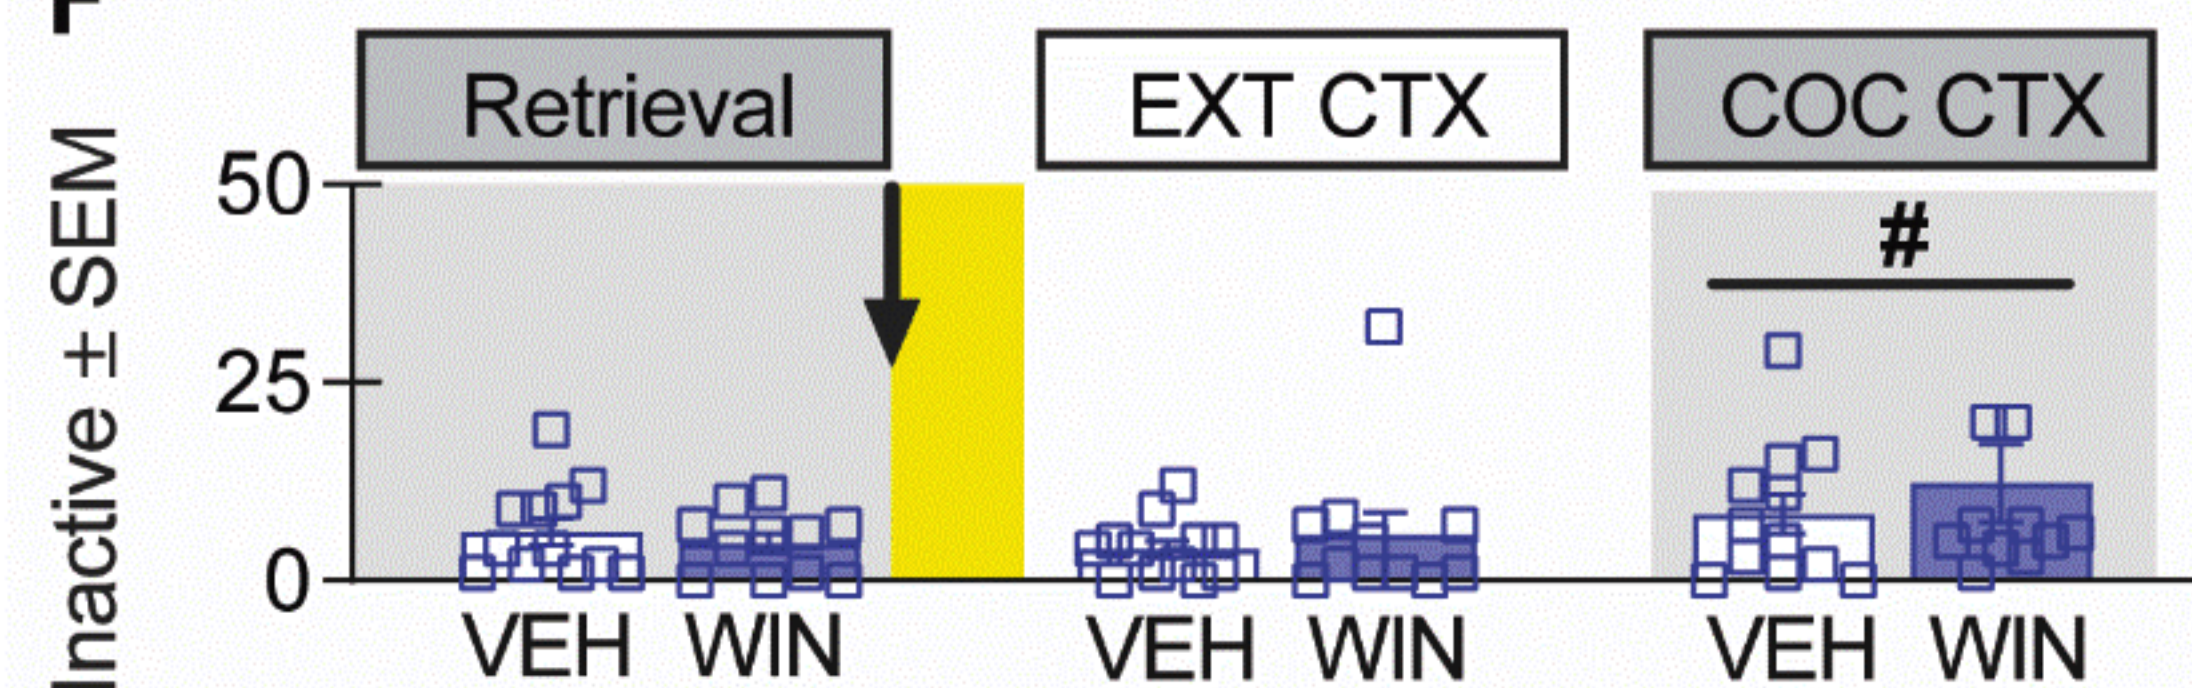**G**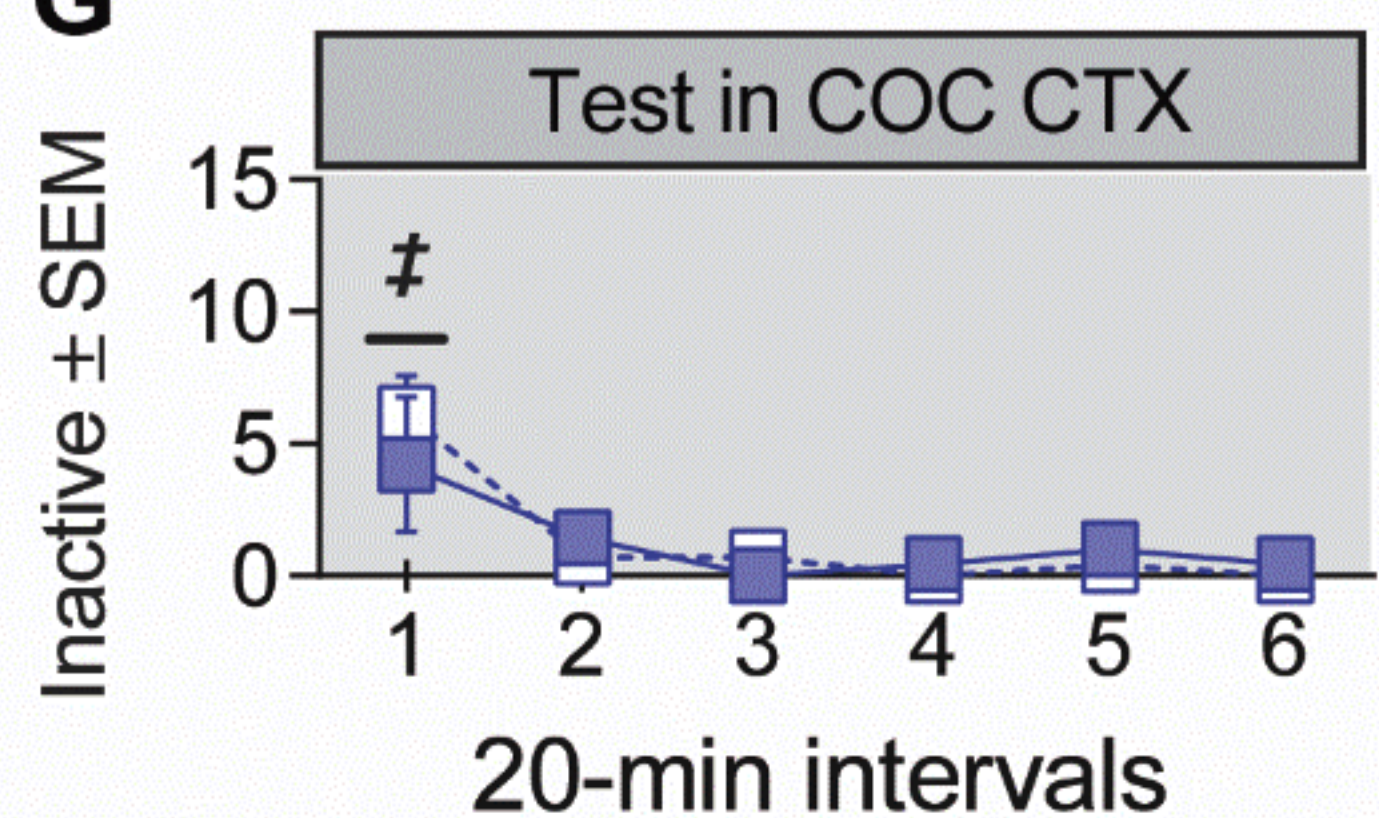



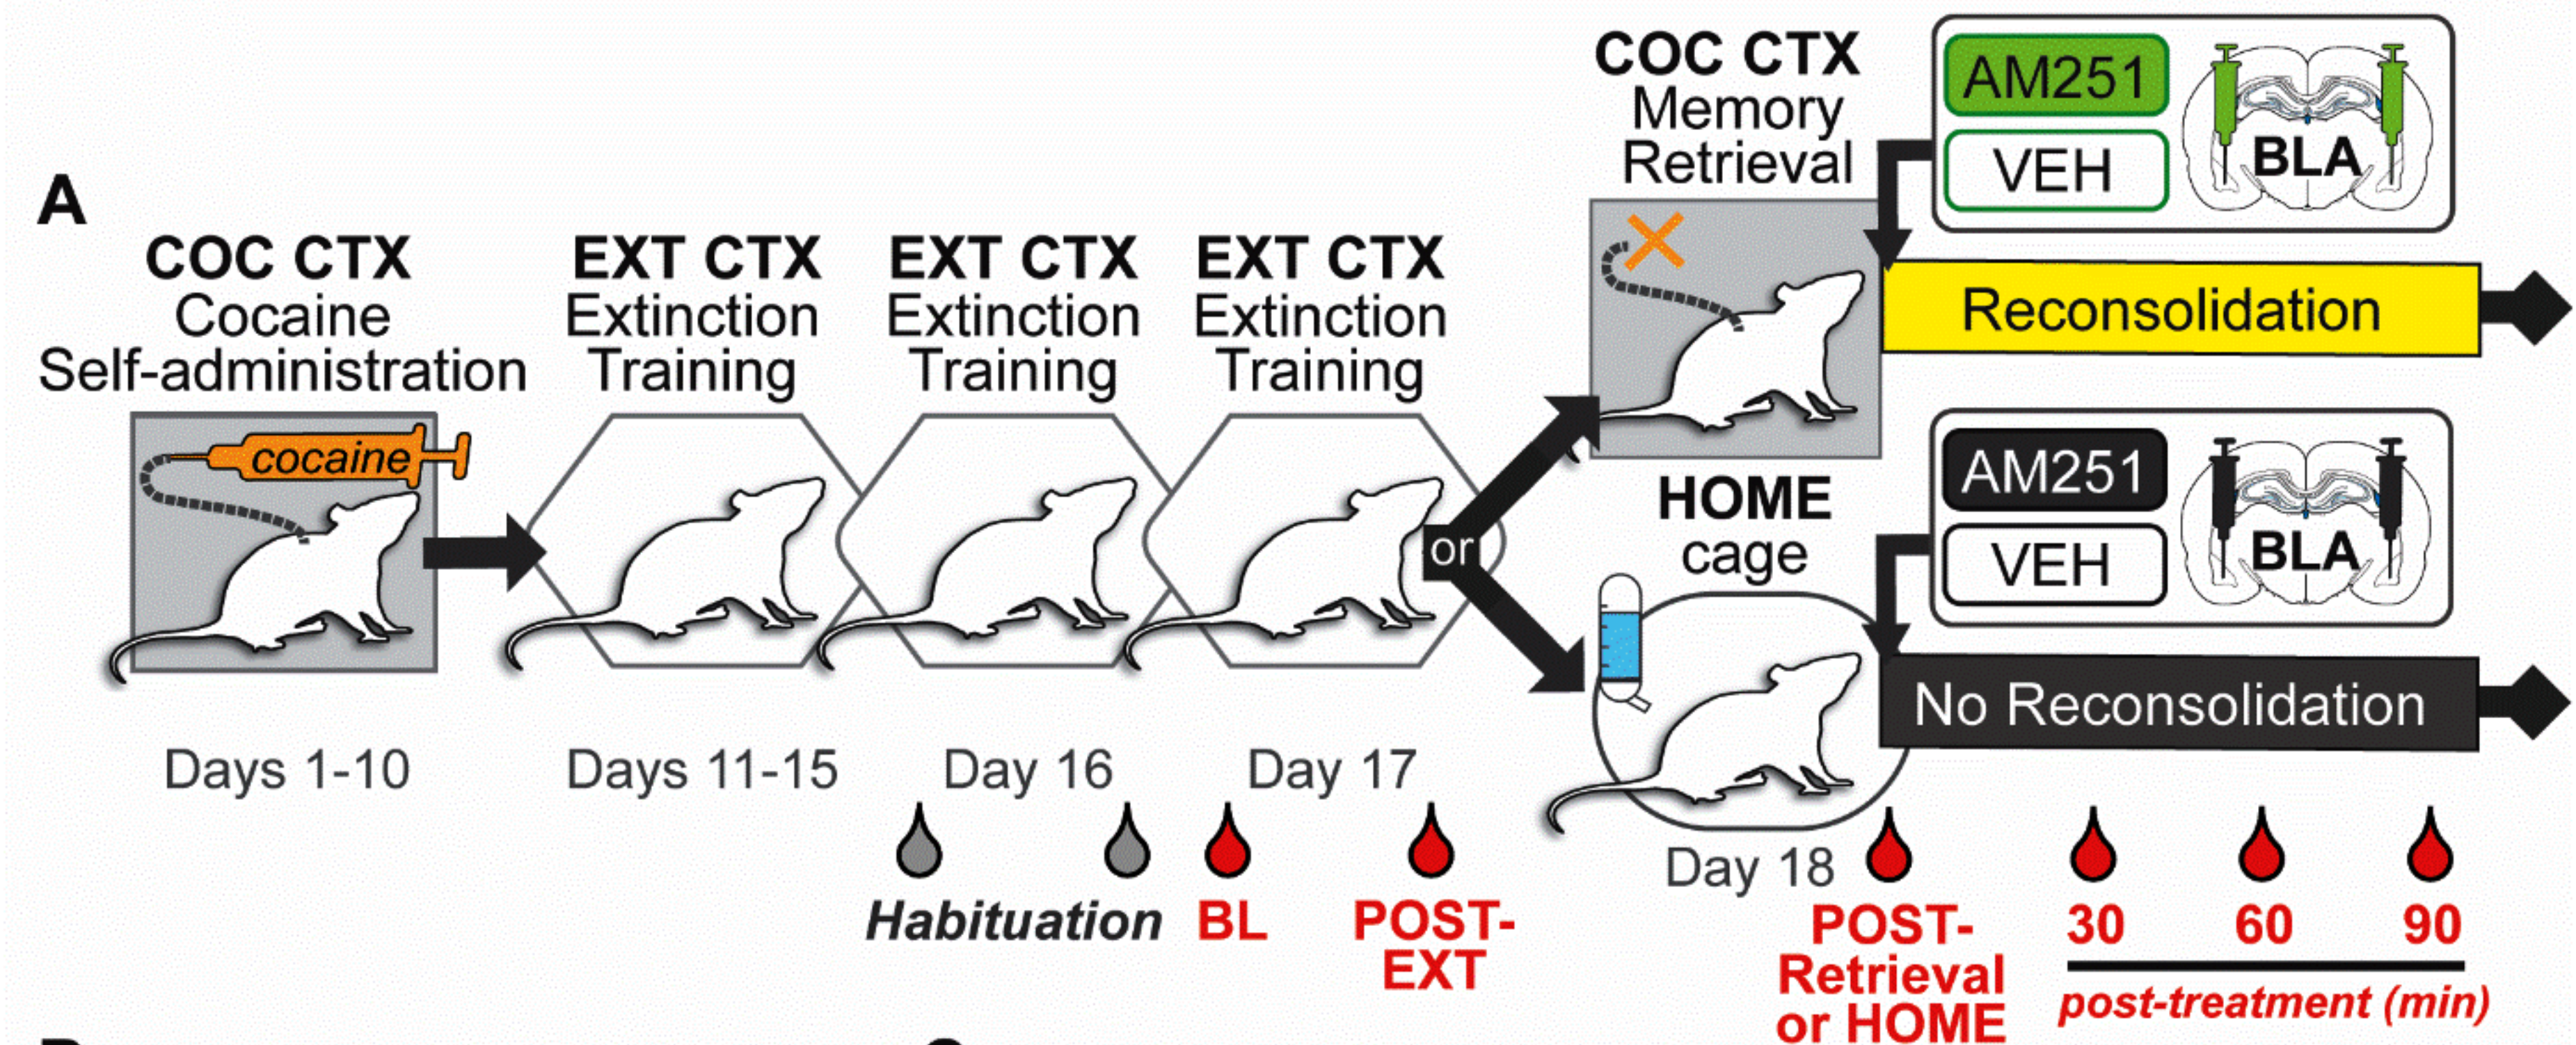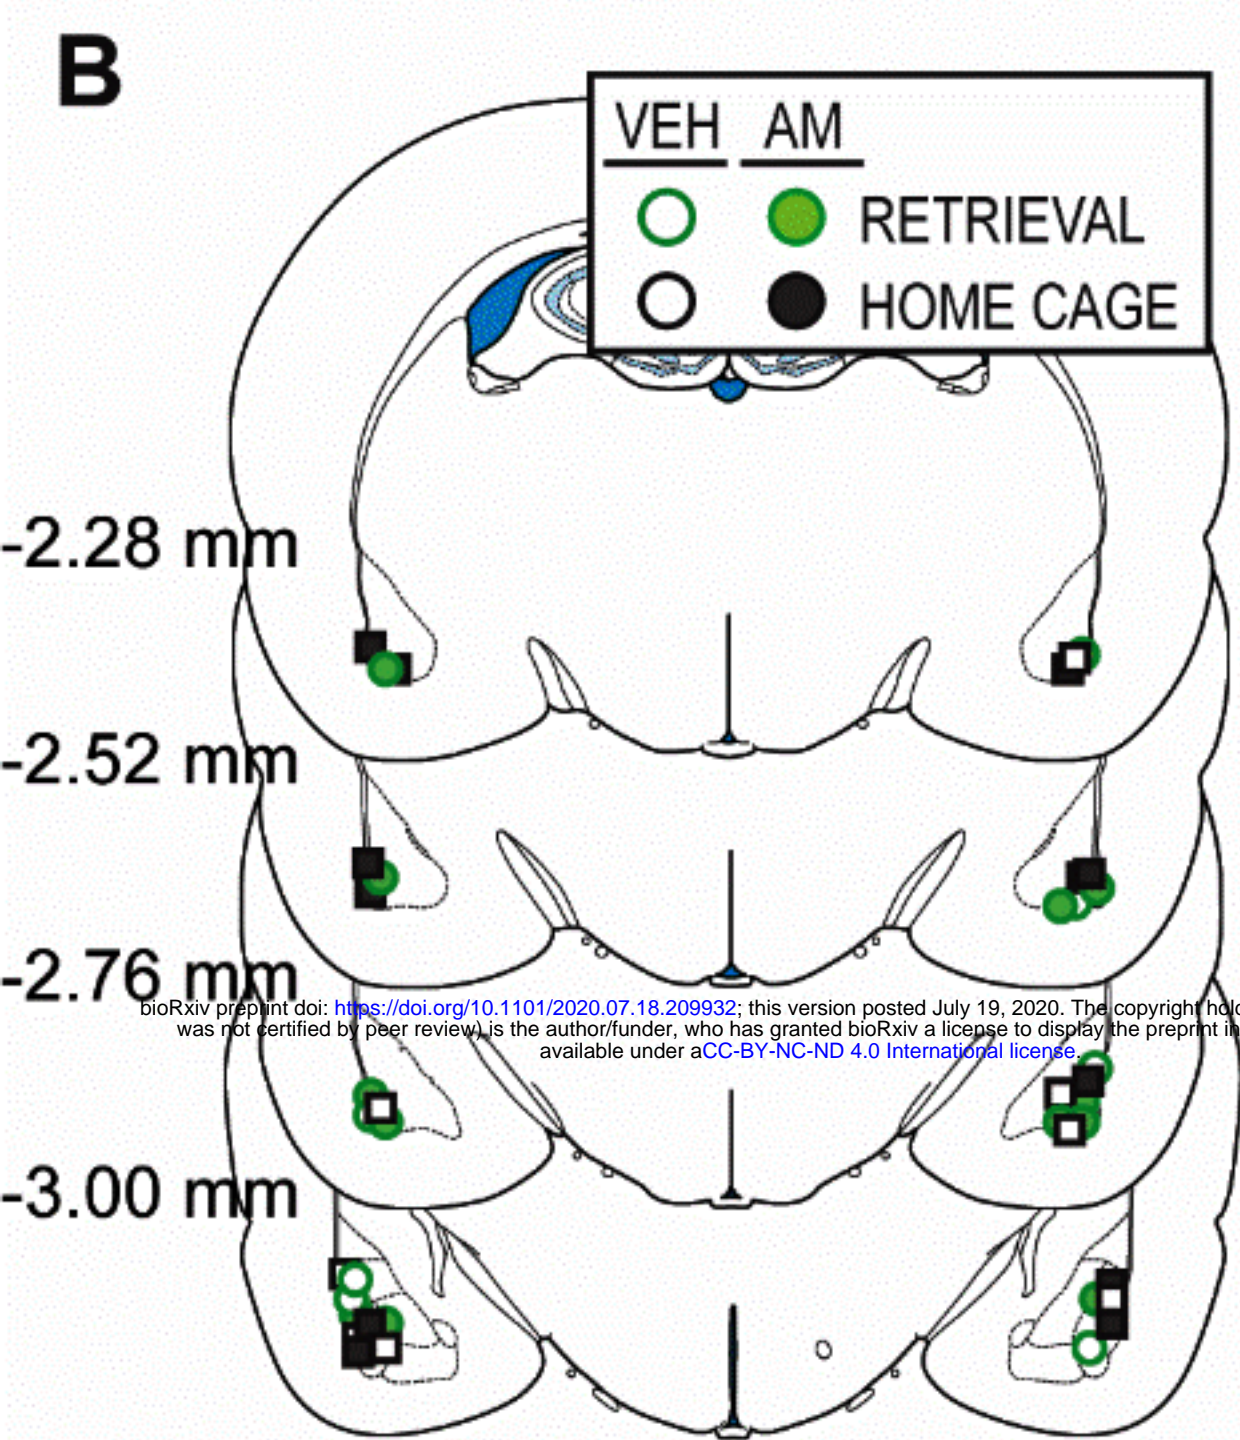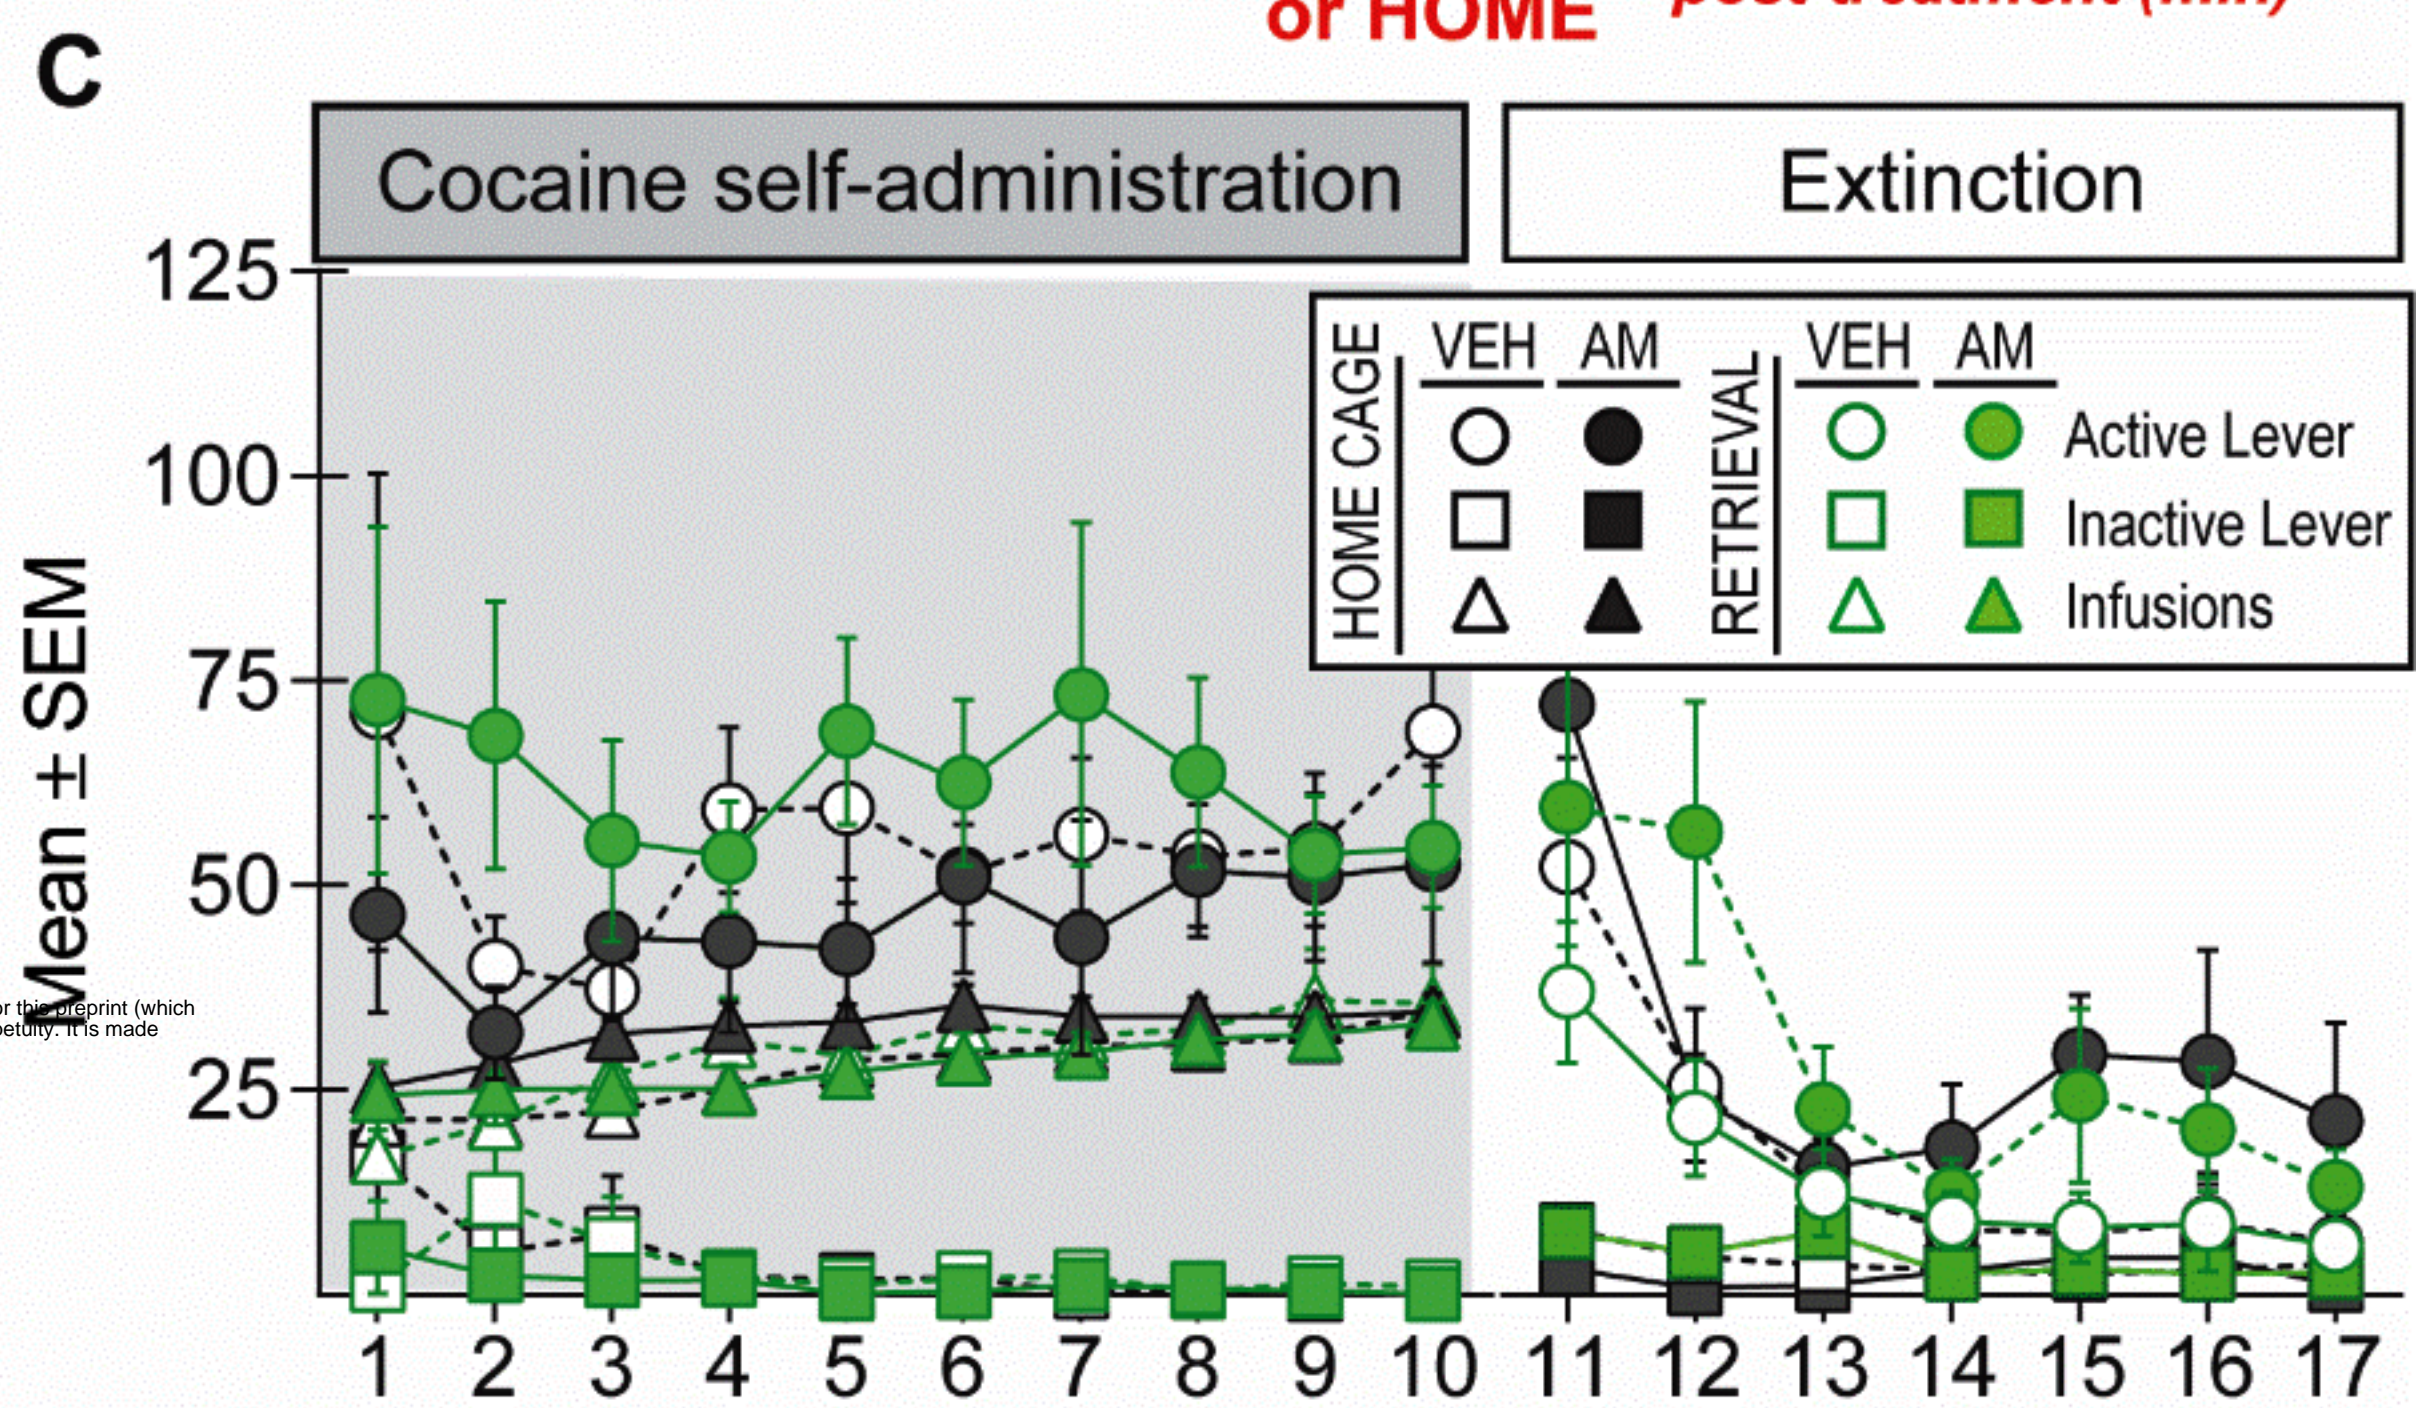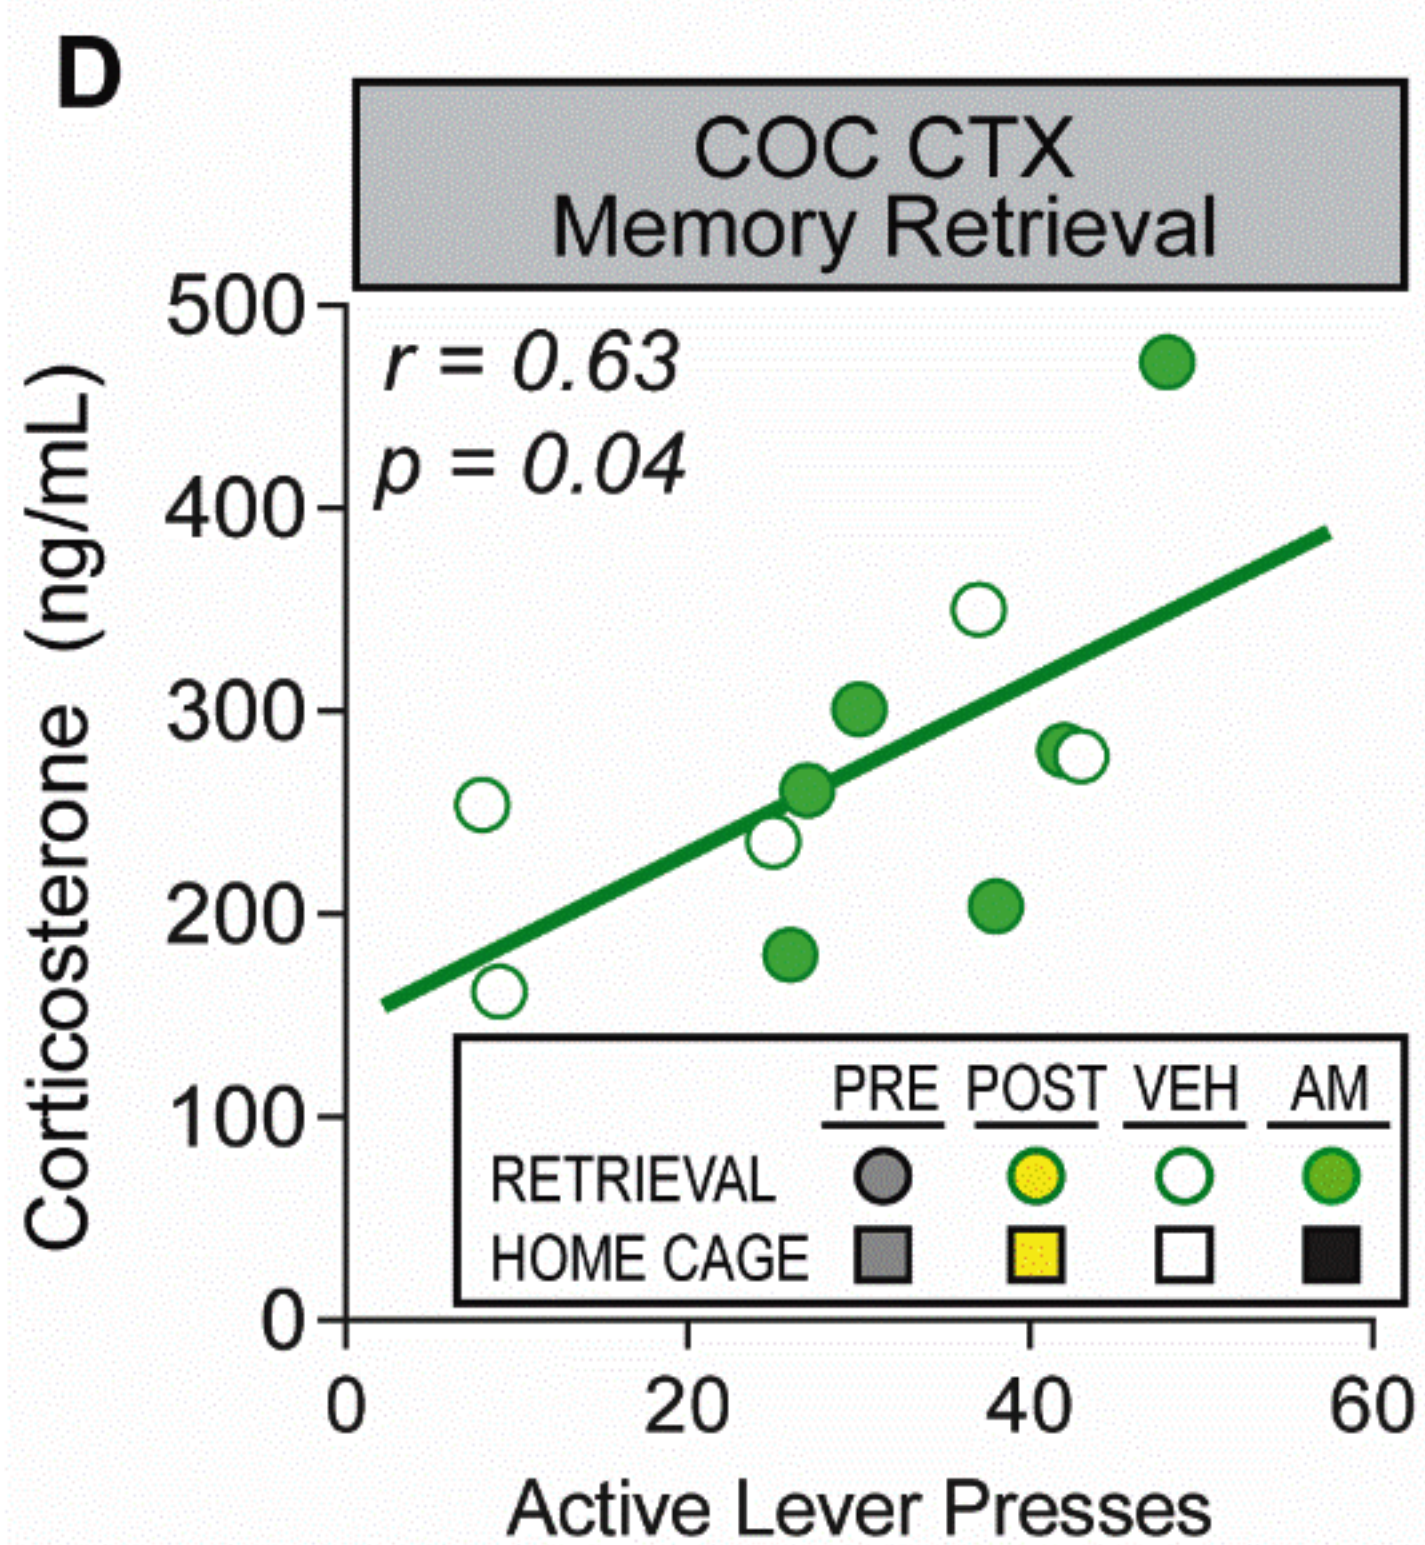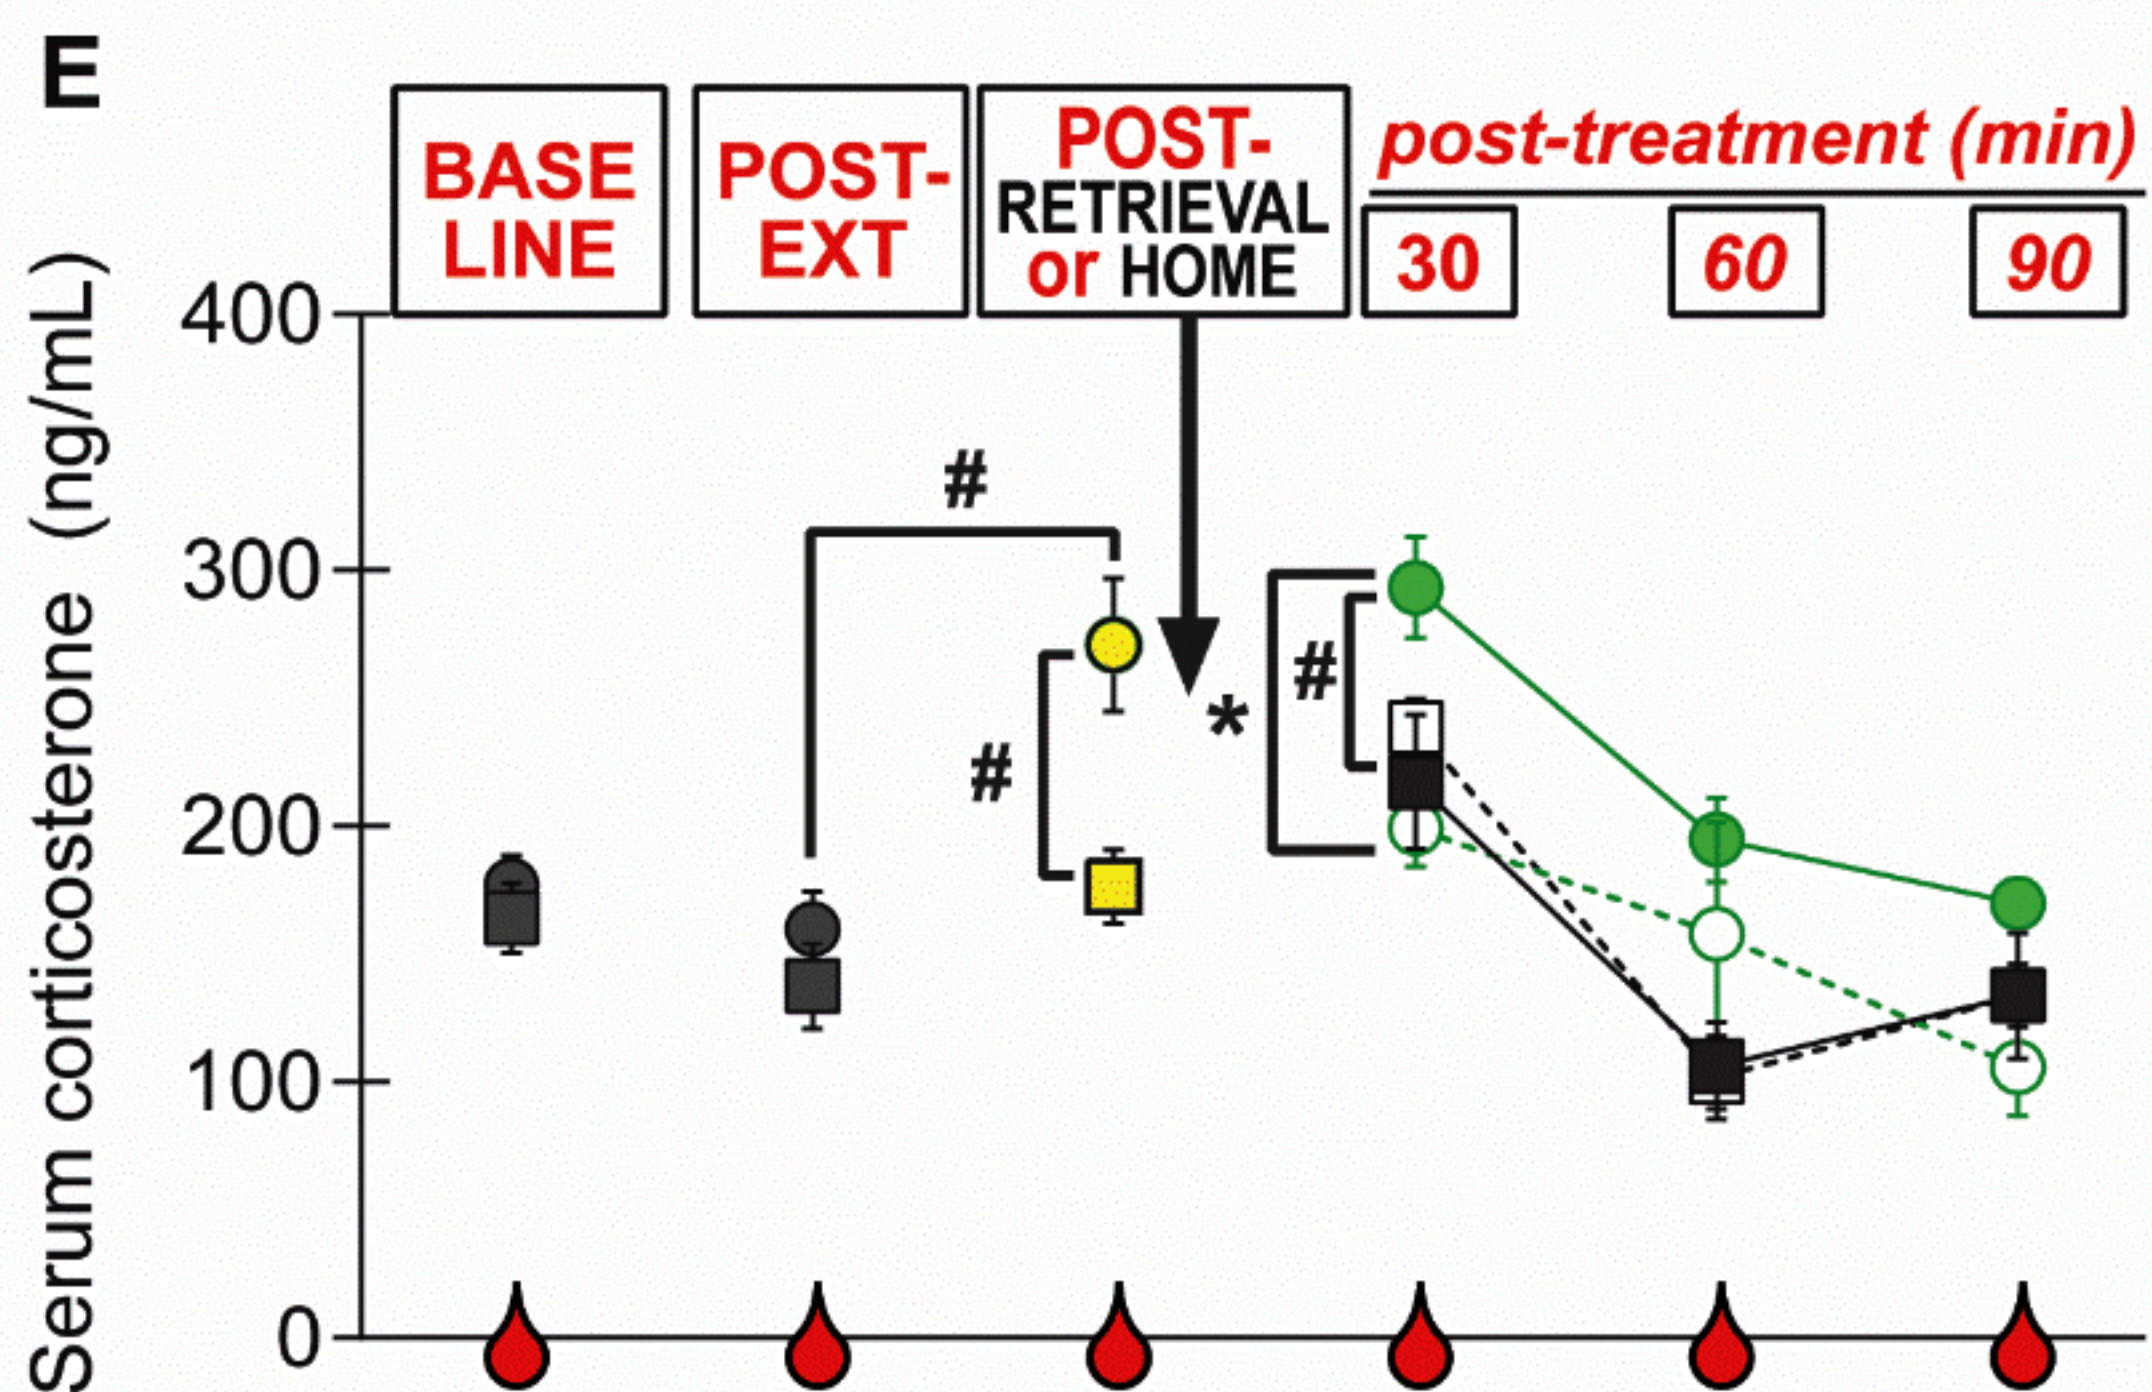



1 **SUPPLEMENTARY MATERIALS**

2

3 **Table S1.**

| <b>Context</b> | <b>Visual</b>                             | <b>Auditory</b>                  | <b>Olfactory</b>              | <b>Tactile</b>                               |
|----------------|-------------------------------------------|----------------------------------|-------------------------------|----------------------------------------------|
| <b>A</b>       | Continuous red house light                | Intermittent tone (78 dB, 10 hz) | Vanilla-scented air freshener | Wire mesh flooring                           |
| <b>B</b>       | Flashing white light above inactive lever | Continuous tone (78 dB, 2kHz)    | Pine-scented air freshener    | Slanted tile bisecting a steel grid flooring |

4

5

6 **Table S2. Behavioral History of Rats in Experiments 1-5**

| Experiment 1 - BLA AM251                |                   |                        |      |           |      |                  |       |           |         |                 |       |           |      |
|-----------------------------------------|-------------------|------------------------|------|-----------|------|------------------|-------|-----------|---------|-----------------|-------|-----------|------|
| Phase                                   | Measure           | Treatment Main Effects |      |           |      | Day Main Effects |       |           |         | Treatment x Day |       |           |      |
|                                         |                   | Test                   | df   | Statistic | p    | Test             | df    | Statistic | p       | Test            | df    | Statistic | p    |
| Self-Administration                     | Active Lever      | F                      | 1,18 | 0.47      | 0.50 | F                | 9,162 | 0.50      | 0.88    | F               | 9,162 | 1.30      | 0.24 |
|                                         | Inactive Lever    | F                      | 1,18 | 1.29      | 0.27 | F                | 9,162 | 1.93      | 0.05    | F               | 9,162 | 0.33      | 0.96 |
|                                         | Cocaine Infusions | F                      | 1,18 | 0.87      | 0.36 | F                | 9,162 | 1.95      | 0.05    | F               | 9,162 | 2.20      | 0.02 |
| Extinction                              | Active Lever      | F                      | 1,18 | 0.02      | 0.89 | F                | 6,108 | 26.27     | <0.0001 | F               | 6,108 | 0.77      | 0.60 |
|                                         | Inactive Lever    | F                      | 1,18 | 1.33      | 0.26 | F                | 6,108 | 6.32      | <0.0001 | F               | 6,108 | 2.36      | 0.03 |
| Memory Retrieval                        | Active Lever      | t                      | 18   | 1.11      | 0.28 |                  |       |           |         |                 |       |           |      |
|                                         | Inactive Lever    | t                      | 18   | 0.22      | 0.83 |                  |       |           |         |                 |       |           |      |
| Post treatment EXT (1st/last)           | Active Lever      | F                      | 1,18 | 0.74      | 0.40 | F                | 1,18  | 0.04      | 0.85    | F               | 1,18  | 0.13      | 0.72 |
|                                         | Inactive Lever    | F                      | 1,18 | 1.22      | 0.28 | F                | 1,18  | 2.97      | 0.10    | F               | 1,18  | 0.69      | 0.42 |
| Experiment 2 - Delayed BLA AM251        |                   |                        |      |           |      |                  |       |           |         |                 |       |           |      |
| Phase                                   | Measure           | Treatment Main Effects |      |           |      | Day Main Effects |       |           |         | Treatment x Day |       |           |      |
|                                         |                   | Test                   | df   | Statistic | p    | Test             | df    | Statistic | p       | Test            | df    | Statistic | p    |
| Self-Administration                     | Active Lever      | F                      | 1,12 | 1.33      | 0.27 | F                | 9,108 | 1.02      | 0.43    | F               | 9,108 | 0.82      | 0.60 |
|                                         | Inactive Lever    | F                      | 1,12 | 0.87      | 0.37 | F                | 9,108 | 2.65      | 0.01    | F               | 9,108 | 0.59      | 0.80 |
|                                         | Cocaine Infusions | F                      | 1,12 | 0.24      | 0.63 | F                | 9,108 | 5.00      | <0.0001 | F               | 9,108 | 1.19      | 0.31 |
| Extinction                              | Active Lever      | F                      | 1,12 | 0.00      | 0.95 | F                | 6,72  | 13.69     | <0.0001 | F               | 6,72  | 0.38      | 0.89 |
|                                         | Inactive Lever    | F                      | 1,12 | 0.57      | 0.46 | F                | 6,72  | 0.89      | 0.50    | F               | 6,72  | 0.56      | 0.76 |
| Memory Retrieval                        | Active Lever      | t                      | 12   | 0.25      | 0.81 |                  |       |           |         |                 |       |           |      |
|                                         | Inactive Lever    | t                      | 12   | 1.38      | 0.19 |                  |       |           |         |                 |       |           |      |
| Post treatment EXT (1st/last)           | Active Lever      | F                      | 1,12 | 0.07      | 0.80 | F                | 1,12  | 0.08      | 0.78    | F               | 1,12  | 0.90      | 0.36 |
|                                         | Inactive Lever    | F                      | 1,12 | 0.24      | 0.63 | F                | 1,12  | 3.41      | 0.09    | F               | 1,12  | 0.65      | 0.44 |
| Experiment 3 - pCPu AM251               |                   |                        |      |           |      |                  |       |           |         |                 |       |           |      |
| Phase                                   | Measure           | Treatment Main Effects |      |           |      | Day Main Effects |       |           |         | Treatment x Day |       |           |      |
|                                         |                   | Test                   | df   | Statistic | p    | Test             | df    | Statistic | p       | Test            | df    | Statistic | p    |
| Self-Administration                     | Active Lever      | F                      | 1,14 | 2.52      | 0.14 | F                | 9,126 | 0.72      | 0.69    | F               | 9,126 | 1.14      | 0.34 |
|                                         | Inactive Lever    | F                      | 1,14 | 1.19      | 0.03 | F                | 9,126 | 2.10      | 0.03    | F               | 9,126 | 1.87      | 0.06 |
|                                         | Cocaine Infusions | F                      | 1,14 | 0.07      | 0.79 | F                | 9,126 | 2.69      | 0.01    | F               | 9,126 | 1.47      | 0.17 |
| Extinction                              | Active Lever      | F                      | 1,14 | 1.07      | 0.32 | F                | 6,84  | 3.44      | 0.00    | F               | 6,84  | 0.94      | 0.47 |
|                                         | Inactive Lever    | F                      | 1,14 | 0.94      | 0.35 | F                | 6,84  | 5.26      | <0.0001 | F               | 6,84  | 0.42      | 0.86 |
| Memory Retrieval                        | Active Lever      | t                      | 14   | 0.08      | 0.94 |                  |       |           |         |                 |       |           |      |
|                                         | Inactive Lever    | t                      | 14   | 0.09      | 0.93 |                  |       |           |         |                 |       |           |      |
| Post treatment EXT (1st/last)           | Active Lever      | F                      | 1,14 | 1.18      | 0.30 | F                | 1,14  | 0.10      | 0.76    | F               | 1,14  | 0.22      | 0.65 |
|                                         | Inactive Lever    | F                      | 1,14 | 0.43      | 0.52 | F                | 1,14  | 1.62      | 0.22    | F               | 1,14  | 0.08      | 0.79 |
| Experiment 4 - BLA WIN                  |                   |                        |      |           |      |                  |       |           |         |                 |       |           |      |
| Phase                                   | Measure           | Treatment Main Effects |      |           |      | Day Main Effects |       |           |         | Treatment x Day |       |           |      |
|                                         |                   | Test                   | df   | Statistic | p    | Test             | df    | Statistic | p       | Test            | df    | Statistic | p    |
| Self-Administration                     | Active Lever      | F                      | 1,21 | 0.01      | 0.94 | F                | 9,189 | 3.50      | 0.00    | F               | 9,189 | 1.89      | 0.06 |
|                                         | Inactive Lever    | F                      | 1,21 | 1.63      | 0.22 | F                | 9,189 | 10.03     | <0.0001 | F               | 9,189 | 1.34      | 0.22 |
|                                         | Cocaine Infusions | F                      | 1,21 | 0.47      | 0.50 | F                | 9,189 | 2.16      | 0.03    | F               | 9,189 | 0.99      | 0.45 |
| Extinction                              | Active Lever      | F                      | 1,21 | 3.72      | 0.07 | F                | 6,126 | 25.36     | <0.0001 | F               | 6,126 | 2.14      | 0.05 |
|                                         | Inactive Lever    | F                      | 1,21 | 1.56      | 0.23 | F                | 6,126 | 6.06      | <0.0001 | F               | 6,126 | 0.25      | 0.96 |
| Memory Retrieval                        | Active Lever      | t                      | 21   | 0.78      | 0.44 |                  |       |           |         |                 |       |           |      |
|                                         | Inactive Lever    | t                      | 21   | 0.49      | 0.49 |                  |       |           |         |                 |       |           |      |
| Post treatment EXT (1st/last)           | Active Lever      | F                      | 1,21 | 1.27      | 0.27 | F                | 1,21  | 0.01      | 0.92    | F               | 1,21  | 0.02      | 0.88 |
|                                         | Inactive Lever    | F                      | 1,21 | 1.60      | 0.22 | F                | 1,21  | 1.20      | 0.29    | F               | 1,21  | 1.78      | 0.20 |
| Experiment 5 - BLA AM251 Corticosterone |                   |                        |      |           |      |                  |       |           |         |                 |       |           |      |
| Phase                                   | Measure           | Treatment Main Effects |      |           |      | Day Main Effects |       |           |         | Treatment x Day |       |           |      |
|                                         |                   | Test                   | df   | Statistic | p    | Test             | df    | Statistic | p       | Test            | df    | Statistic | p    |
| Self-Administration                     | Active Lever      | F                      | 1,14 | 0.24      | 0.63 | F                | 9,126 | 0.99      | 0.45    | F               | 9,126 | 1.21      | 0.29 |
|                                         | Inactive Lever    | F                      | 1,14 | 1.19      | 0.29 | F                | 9,126 | 2.10      | 0.03    | F               | 9,126 | 1.87      | 0.06 |
|                                         | Cocaine Infusions | F                      | 1,14 | 0.07      | 0.79 | F                | 9,126 | 2.69      | 0.01    | F               | 9,126 | 1.47      | 0.17 |
| Extinction                              | Active Lever      | F                      | 1,14 | 1.07      | 0.32 | F                | 6,84  | 3.44      | 0.00    | F               | 6,84  | 0.94      | 0.47 |
|                                         | Inactive Lever    | F                      | 1,14 | 0.94      | 0.35 | F                | 6,84  | 5.26      | <0.0001 | F               | 6,84  | 0.42      | 0.86 |
| Memory Retrieval                        | Active Lever      | t                      | 14   | 0.08      | 0.94 |                  |       |           |         |                 |       |           |      |
|                                         | Inactive Lever    | t                      | 14   | 0.09      | 0.93 |                  |       |           |         |                 |       |           |      |

7

8

9

10

11
